# Supplementary material for: Ecological ReGional Ocean Model with vertically resolved sediments (ERGOM SED 1.0): Coupling benthic and pelagic biogeochemistry of the south-western Baltic Sea
Source: Copernicus journal article supplement (doi:10.5194/gmd-2018-109), 2018-05-02
Supplement: Supplementary file 2 [file gmd-2018-109-supplement.zip]

# **ERGOM ( SED 1.0 ) Documentation**

Thomas Neumann, Hagen Radtke, Martin Schmidt, and Bronwyn Cahill

June 16, 2017

# Contents

|          |                                                                |           |
|----------|----------------------------------------------------------------|-----------|
| <b>1</b> | <b>Introduction</b>                                            | <b>3</b>  |
| <b>2</b> | <b>Description of model state variables (tracers)</b>          | <b>4</b>  |
| <b>3</b> | <b>Description of model processes, ordered by process type</b> | <b>8</b>  |
| 3.1      | Process type BGC/benthic/bioresuspension . . . . .             | 8         |
| 3.2      | Process type BGC/benthic/mineralization . . . . .              | 11        |
| 3.3      | Process type BGC/benthic/precipitation . . . . .               | 21        |
| 3.4      | Process type BGC/benthic/reoxidation . . . . .                 | 26        |
| 3.5      | Process type BGC/pelagic/mineralization . . . . .              | 36        |
| 3.6      | Process type BGC/pelagic/phytoplankton . . . . .               | 40        |
| 3.7      | Process type BGC/pelagic/reoxidation . . . . .                 | 47        |
| 3.8      | Process type BGC/pelagic/zooplankton . . . . .                 | 51        |
| 3.9      | Process type gas_exchange . . . . .                            | 54        |
| 3.10     | Process type only1d . . . . .                                  | 59        |
| 3.11     | Process type physics/adsorption . . . . .                      | 62        |
| 3.12     | Process type physics/erosion . . . . .                         | 68        |
| 3.13     | Process type physics/parameterization_deep_burial . . . . .    | 71        |
| 3.14     | Process type physics/parameterization_diffusion . . . . .      | 73        |
| 3.15     | Process type physics/parameterization_lateral . . . . .        | 78        |
| 3.16     | Process type physics/precipitation . . . . .                   | 81        |
| 3.17     | Process type physics/sedimentation . . . . .                   | 88        |
| 3.18     | Process type standard . . . . .                                | 90        |
| <b>4</b> | <b>Tracer equations</b>                                        | <b>91</b> |

# 1 Introduction

This is an automatically generated description of the ecosystem model ERGOM version SED 1.0 . Model formulation is provided by text files in compliance with the rules of the Code Generation Tool (CGT) by Hagen Radtke (see [www.ergom.net](http://www.ergom.net)).

The model consists of a set of state variables, the so called tracers. They are defined and described in Chapter 2.

The following Chapter 3 is the main part of this model description document, since it describes the processes which change the tracer concentrations over time. They are defined analog to chemical processes, two components describe their action:

- A process equation which describes the transformation from precursors (on the left-hand side) to products (on the right-hand side), and
- a turnover rate, describing how fast the process runs.

The rate at which a process changes a tracer can then easily be determined by multiplying the process turnover rate with the stoichiometric ratio in which it consumes or produces the tracer according to the reaction equation.

We structured the documentation into different process types to keep the documentation readable. So all processes belonging to one type (e.g. phytoplankton assimilation) are listed together with their constants and auxiliary variables they depend on. This means that some constants, such as stoichiometric ratios, will occur several times in this documentation, making it longer. We take this compromise for the sake of readability, keeping all information required to understand a specific process in its own section.

The classical way of describing an ecosystem model is by giving the tracer equations. We still do this in the last chapter for the sake of completeness, but rather suggest to stick to Chapter 3 to understand the model, and see Chapter 4 as a supplement only.

## 2 Description of model state variables (tracers)

| Tracers in the water column only |                                                   |
|----------------------------------|---------------------------------------------------|
| t_don                            | autochthonous dissolved organic nitrogen (mol/kg) |
| t_spp                            | small-cell phytoplankton (mol/kg)                 |
| opacity =                        | 30.0 m <sup>2</sup> /mol                          |
| t_zoo                            | zooplankton (mol/kg)                              |
| t_ipw                            | suspended iron phosphate (mol/kg)                 |
| vertical speed =                 | -1.0 m/day                                        |
| t_lpp                            | large-cell phytoplankton (mol/kg)                 |
| vertical speed =                 | -0.5 m/day                                        |
| opacity =                        | 30.0 m <sup>2</sup> /mol                          |
| t_cya                            | diazotroph cyanobacteria (mol/kg)                 |
| vertical speed =                 | 0.1 m/day                                         |
| opacity =                        | 30.0 m <sup>2</sup> /mol                          |
| t_det_1                          | detritus fractions_1 (mol/kg)                     |
| vertical speed =                 | -4.5 m/day                                        |
| opacity =                        | 45.0 m <sup>2</sup> /mol                          |
| t_det_2                          | detritus fractions_2 (mol/kg)                     |
| vertical speed =                 | -4.5 m/day                                        |
| opacity =                        | 45.0 m <sup>2</sup> /mol                          |
| t_det_3                          | detritus fractions_3 (mol/kg)                     |
| vertical speed =                 | -4.5 m/day                                        |
| opacity =                        | 45.0 m <sup>2</sup> /mol                          |
| t_det_4                          | detritus fractions_4 (mol/kg)                     |
| vertical speed =                 | -4.5 m/day                                        |
| opacity =                        | 45.0 m <sup>2</sup> /mol                          |
| t_det_5                          | detritus fractions_5 (mol/kg)                     |
| vertical speed =                 | -4.5 m/day                                        |
| opacity =                        | 45.0 m <sup>2</sup> /mol                          |
| continued on next page...        |                                                   |

| Tracers in the water column only, continued from previous page |                                             |
|----------------------------------------------------------------|---------------------------------------------|
| t_det_6                                                        | detritus fractions__6 (mol/kg)              |
| vertical speed =                                               | -4.5 m/day                                  |
| opacity =                                                      | 45.0 m <sup>2</sup> /mol                    |
| t_ihw                                                          | suspended iron hydroxide (mol/kg)           |
| vertical speed =                                               | -1.0 m/day                                  |
| t_mow                                                          | suspended manganese oxide (mol/kg)          |
| vertical speed =                                               | -1.0 m/day                                  |
| t_detp_1                                                       | phosphate in detritus fractions__1 (mol/kg) |
| vertical speed =                                               | -4.5 m/day                                  |
| t_detp_2                                                       | phosphate in detritus fractions__2 (mol/kg) |
| vertical speed =                                               | -4.5 m/day                                  |
| t_detp_3                                                       | phosphate in detritus fractions__3 (mol/kg) |
| vertical speed =                                               | -4.5 m/day                                  |
| t_detp_4                                                       | phosphate in detritus fractions__4 (mol/kg) |
| vertical speed =                                               | -4.5 m/day                                  |
| t_detp_5                                                       | phosphate in detritus fractions__5 (mol/kg) |
| vertical speed =                                               | -4.5 m/day                                  |
| t_detp_6                                                       | phosphate in detritus fractions__6 (mol/kg) |
| vertical speed =                                               | -4.5 m/day                                  |
| t_poc                                                          | particulate organic carbon (mol/kg)         |
| vertical speed =                                               | -0.5 m/day                                  |
| Tracers in water and pore water                                |                                             |
| t_n2                                                           | dissolved molecular nitrogen (mol/kg)       |
| t_o2                                                           | dissolved molecular oxygen (mol/kg)         |
| t_dic                                                          | dissolved inorganic carbon (mol/kg)         |
| t_nh4                                                          | ammonium (mol/kg)                           |
| t_no3                                                          | nitrate (mol/kg)                            |
| t_po4                                                          | phosphate (mol/kg)                          |
| t_h2s                                                          | hydrogen sulfide (mol/kg)                   |
| continued on next page...                                      |                                             |

| Tracers in water and pore water, continued from previous page |                                                                   |
|---------------------------------------------------------------|-------------------------------------------------------------------|
| t_sul                                                         | sulfur (mol/kg)                                                   |
| t_alk                                                         | total alkalinity (mol/kg)                                         |
| t_so4                                                         | sulfate (mol/kg)                                                  |
| t_fe2                                                         | ferrous iron (mol/kg)                                             |
| t_ca2                                                         | dissolved calcium (mol/kg)                                        |
| t_mn2                                                         | dissolved manganese-II (mol/kg)                                   |
| t_ohm_quickdiff                                               | OH- ions with realistically quick diffusion (mol/kg)              |
| t_ohm_slowdiff                                                | OH- ions which move unrealistically slow with alkalinity (mol/kg) |
| t_sil                                                         | silicate (mol/kg)                                                 |
| Tracers in fluff and sediment                                 |                                                                   |
| t_ips                                                         | iron-bound phosphate in the sediment (mol/m <sup>2</sup> )        |
| t_sed_1                                                       | sedimentary detritus fractions_1 (mol/m <sup>2</sup> )            |
| t_sed_2                                                       | sedimentary detritus fractions_2 (mol/m <sup>2</sup> )            |
| t_sed_3                                                       | sedimentary detritus fractions_3 (mol/m <sup>2</sup> )            |
| t_sed_4                                                       | sedimentary detritus fractions_4 (mol/m <sup>2</sup> )            |
| t_sed_5                                                       | sedimentary detritus fractions_5 (mol/m <sup>2</sup> )            |
| t_sed_6                                                       | sedimentary detritus fractions_6 (mol/m <sup>2</sup> )            |
| t_ihs                                                         | iron hydroxide in the sediment (mol/m <sup>2</sup> )              |
| t_pyr                                                         | pyrite (mol/m <sup>2</sup> )                                      |
| t_ims                                                         | iron monosulphide (mol/m <sup>2</sup> )                           |
| t_mos                                                         | manganese oxide in the sediments (mol/m <sup>2</sup> )            |
| t_rho                                                         | rhodochrosite (mol/m <sup>2</sup> )                               |
| continued on next page...                                     |                                                                   |

| Tracers in fluff and sediment, continued from previous page |                                                                                                     |
|-------------------------------------------------------------|-----------------------------------------------------------------------------------------------------|
| t_iim                                                       | iron-II adsorbed to illite-montmorillonite mixed layer minerals (mol/m <sup>2</sup> )               |
| t_i3i                                                       | potentially reducible iron-III in illite-montmorillonite mixed layer minerals (mol/m <sup>2</sup> ) |
| t_ihc                                                       | iron hydroxide in the sediment - crystalline phase (mol/m <sup>2</sup> )                            |
| t_pim                                                       | phosphate adsorbed to illite-montmorillonite (mol/m <sup>2</sup> )                                  |
| t_aim                                                       | ammonium adsorbed to illite-montmorillonite (mol/m <sup>2</sup> )                                   |
| t_sedp_1                                                    | phosphate in sedimentary detritus fractions_1 (mol/m <sup>2</sup> )                                 |
| t_sedp_2                                                    | phosphate in sedimentary detritus fractions_2 (mol/m <sup>2</sup> )                                 |
| t_sedp_3                                                    | phosphate in sedimentary detritus fractions_3 (mol/m <sup>2</sup> )                                 |
| t_sedp_4                                                    | phosphate in sedimentary detritus fractions_4 (mol/m <sup>2</sup> )                                 |
| t_sedp_5                                                    | phosphate in sedimentary detritus fractions_5 (mol/m <sup>2</sup> )                                 |
| t_sedp_6                                                    | phosphate in sedimentary detritus fractions_6 (mol/m <sup>2</sup> )                                 |

## 3 Description of model processes, ordered by process type

### 3.1 Process type BGC/benthic/bioresuspension

| Processes                                                                                                                                                                                                                                                   |
|-------------------------------------------------------------------------------------------------------------------------------------------------------------------------------------------------------------------------------------------------------------|
| bio resuspension of sedimentary detritus (index 1 to 6) (sediment only)<br>[mol/m <sup>2</sup> /day]<br>t_sed_1 -> t_det_1<br>p_sed_1_biores_det = (r_biores*t_sed_1*(1.0-cgt_in_sediment))*lim_t_o2_7*<br>= lim_t_sed_1_22                                 |
| bio resuspension of sedimentary detritus (index 1 to 6) (sediment only)<br>[mol/m <sup>2</sup> /day]<br>t_sedp_1 -> t_detp_1<br>(r_biores*t_sedp_1*(1.0-cgt_in_sediment))*lim_t_o2_7*<br>p_sedp_1_biores_detplim_t_sedp_1_46<br>=                           |
| bio resuspension of iron PO4 (sediment only) [mol/m <sup>2</sup> /day]<br>t_ips -> t_ipw<br>p_ips_biores_ipw = (r_biores*t_ips*(1.0-cgt_in_sediment))*lim_t_o2_7*<br>lim_t_ips_52                                                                           |
| bio resuspension of iron hydroxyde (sediment only) [mol/m <sup>2</sup> /day]<br>t_ihs -> t_ihw<br>p_ihs_biores_ihw = (r_biores*t_ihs*(1.0-cgt_in_sediment))*lim_t_o2_7*<br>lim_t_ihs_53                                                                     |
| bio resuspension of iron hydroxyde (sediment only) [mol/m <sup>2</sup> /day]<br>t_ihc -> t_ihw<br>p_ihc_biores_ihw = (r_biores*t_ihc*(1.0-cgt_in_sediment))*lim_t_o2_7*<br>lim_t_ihc_54                                                                     |
| bio resuspension of iron monosulfide (sediment only) [mol/m <sup>2</sup> /day]<br>0.125*t_so4 + 0.25*h3oplu + 2.25*h2o + t_ims -> t_ihw + 1.125*t_h2s<br>p_ims_biores_ihw = (r_biores*t_ims*(1.0-cgt_in_sediment))*lim_t_o2_7*<br>lim_t_so4_28*lim_t_ims_57 |
| bio resuspension of pyrite (sediment only) [mol/m <sup>2</sup> /day]                                                                                                                                                                                        |
| continued on next page...                                                                                                                                                                                                                                   |



| Processes, continued from previous page                                                                                                                                                       |  |
|-----------------------------------------------------------------------------------------------------------------------------------------------------------------------------------------------|--|
| $t_{\text{pyr}} + 3.75 \cdot h_{2o} \rightarrow 0.25 \cdot h_{3oplus} + 1.875 \cdot t_{h2s} + 0.125 \cdot t_{so4} + t_{ihw}$                                                                  |  |
| $p_{\text{pyr\_biores\_ihw}} = (r_{\text{biores}} \cdot t_{\text{pyr}} \cdot (1.0 - \text{cgt\_in\_sediment})) \cdot \text{lim\_t\_o2\_7} \cdot \text{lim\_t\_pyr\_58}$                       |  |
| <b>bio resuspension of manganese oxide (sediment only) [mol/m<sup>2</sup>/day]</b>                                                                                                            |  |
| $t_{\text{mos}} \rightarrow t_{\text{mow}}$                                                                                                                                                   |  |
| $p_{\text{mos\_biores\_mow}} = (r_{\text{biores}} \cdot t_{\text{mos}} \cdot (1.0 - \text{cgt\_in\_sediment})) \cdot \text{lim\_t\_o2\_7} \cdot \text{lim\_t\_mos\_59}$                       |  |
| <b>bio resuspension of rhodochrosite (sediment only) [mol/m<sup>2</sup>/day]</b>                                                                                                              |  |
| $0.25 \cdot t_{so4} + 1.7 \cdot h_{3oplus} + t_{rho} \rightarrow t_{mow} + 0.25 \cdot t_{h2s} + 2.3 \cdot h_{2o} + 0.6 \cdot t_{ca2} + 1.6 \cdot t_{dic}$                                     |  |
| $p_{\text{rho\_biores\_mow}} = (r_{\text{biores}} \cdot t_{rho} \cdot (1.0 - \text{cgt\_in\_sediment})) \cdot \text{lim\_t\_o2\_7} \cdot \text{lim\_t\_so4\_28} \cdot \text{lim\_t\_rho\_60}$ |  |
| <b>bio resuspension of iron in clay minerals (sediment only) [mol/m<sup>2</sup>/day]</b>                                                                                                      |  |
| $0.125 \cdot t_{so4} + 0.25 \cdot h_{2o} + 0.25 \cdot h_{3oplus} + t_{iim} \rightarrow t_{ihw} + 0.125 \cdot t_{h2s}$                                                                         |  |
| $p_{\text{iim\_biores\_ihw}} = (r_{\text{biores}} \cdot t_{iim} \cdot (1.0 - \text{cgt\_in\_sediment})) \cdot \text{lim\_t\_o2\_7} \cdot \text{lim\_t\_so4\_28} \cdot \text{lim\_t\_iim\_61}$ |  |
| Auxiliary variables                                                                                                                                                                           |  |
| Constants                                                                                                                                                                                     |  |
| <b>oxygen half-saturation constant for recycling of sediment detritus using oxygen [mol/kg]</b>                                                                                               |  |
| $o2_{\text{min\_sed\_resp}} = 2.0E-5$                                                                                                                                                         |  |
| <b>bio-resuspension rate [1/day]</b>                                                                                                                                                          |  |
| $r_{\text{biores}} = 0.03$                                                                                                                                                                    |  |
| Process limitation factors                                                                                                                                                                    |  |
| $\text{lim\_t\_o2\_7} = t_{o2} \cdot t_{o2} / (t_{o2} \cdot t_{o2} + o2_{\text{min\_sed\_resp}} \cdot o2_{\text{min\_sed\_resp}})$                                                            |  |
| $\text{lim\_t\_ips\_52} = \text{theta}(t_{\text{ips}} - 0.0)$                                                                                                                                 |  |
| $\text{lim\_t\_so4\_28} = \text{theta}(t_{so4} - 0.0)$                                                                                                                                        |  |
| $\text{lim\_t\_sed\_1\_22} = \text{theta}(t_{\text{sed\_1}} - 0.0)$                                                                                                                           |  |
| $\text{lim\_t\_sed\_2\_23} = \text{theta}(t_{\text{sed\_2}} - 0.0)$                                                                                                                           |  |
| $\text{lim\_t\_sed\_3\_24} = \text{theta}(t_{\text{sed\_3}} - 0.0)$                                                                                                                           |  |
| $\text{lim\_t\_sed\_4\_25} = \text{theta}(t_{\text{sed\_4}} - 0.0)$                                                                                                                           |  |
| $\text{lim\_t\_sed\_5\_26} = \text{theta}(t_{\text{sed\_5}} - 0.0)$                                                                                                                           |  |
| continued on next page...                                                                                                                                                                     |  |

---

Process limitation factors, continued from previous page

---

```
lim_t_sed_6_27 = theta(t_sed_6-0.0)
```

```
lim_t_ihs_53 = theta(t_ihs-0.0)
```

```
lim_t_pyr_58 = theta(t_pyr-0.0)
```

```
lim_t_ims_57 = theta(t_ims-0.0)
```

```
lim_t_mos_59 = theta(t_mos-0.0)
```

```
lim_t_rho_60 = theta(t_rho-0.0)
```

```
lim_t_iim_61 = theta(t_iim-0.0)
```

```
lim_t_ihc_54 = theta(t_ihc-0.0)
```

```
lim_t_sedp_1_46 = theta(t_sedp_1-0.0)
```

```
lim_t_sedp_2_47 = theta(t_sedp_2-0.0)
```

```
lim_t_sedp_3_48 = theta(t_sedp_3-0.0)
```

```
lim_t_sedp_4_49 = theta(t_sedp_4-0.0)
```

```
lim_t_sedp_5_50 = theta(t_sedp_5-0.0)
```

```
lim_t_sedp_6_51 = theta(t_sedp_6-0.0)
```

### 3.2 Process type BGC/benthic/mineralization

| Processes                                                                                                                                                                                                                                                                                                                                                                                                                                                                                                                                                                                                                                                                                                                                                                                                                                                                                                                                                                                                                  |
|----------------------------------------------------------------------------------------------------------------------------------------------------------------------------------------------------------------------------------------------------------------------------------------------------------------------------------------------------------------------------------------------------------------------------------------------------------------------------------------------------------------------------------------------------------------------------------------------------------------------------------------------------------------------------------------------------------------------------------------------------------------------------------------------------------------------------------------------------------------------------------------------------------------------------------------------------------------------------------------------------------------------------|
| <p>recycling of sedimentary detritus to ammonium using oxygen (respiration) (index 1 to 6) (sediment only) [mol/m<sup>2</sup>/day]</p> $\text{h3oplus} + \text{rfr\_pc\_enrichment\_det} * 6.625 * \text{t\_o2} + \text{t\_sed\_1} \rightarrow \text{rfr\_si} * \text{t\_sil} + (1.0 + 6.625 * \text{rfr\_pc\_enrichment\_det}) * \text{h2o} + \text{rfr\_pc\_enrichment\_det} * \text{rfr\_c} * \text{t\_dic} + \text{t\_nh4}$ $\text{p\_sed\_1\_resp\_nh4} = (\text{t\_sed\_1} * \text{r\_det\_1\_rec} * \exp(\text{q10\_det\_rec} * \text{cgt\_temp})) * \text{lim\_t\_o2\_12} * \text{lim\_t\_sed\_1\_22}$                                                                                                                                                                                                                                                                                                                                                                                                             |
| <p>recycling of sedimentary detritus to ammonium using nitrate (denitrification) (index 1 to 6) (sediment only) [mol/m<sup>2</sup>/day]</p> $\text{t\_sed\_1} + (1.0 + 5.3 * \text{rfr\_pc\_enrichment\_det}) * \text{h3oplus} + \text{rfr\_pc\_enrichment\_det} * 5.3 * \text{t\_no3} \rightarrow \text{rfr\_pc\_enrichment\_det} * \text{rfr\_c} * \text{t\_dic} + \text{t\_nh4} + \text{rfr\_pc\_enrichment\_det} * 2.65 * \text{t\_n2} + (1.0 + 14.575 * \text{rfr\_pc\_enrichment\_det}) * \text{h2o} + \text{rfr\_si} * \text{t\_sil}$ $\text{p\_sed\_1\_denit\_nh4} = (\text{t\_sed\_1} * \text{r\_det\_1\_rec} * \exp(\text{q10\_det\_rec} * \text{cgt\_temp})) * \text{pH\_inhibition\_ironred} * (1.0 - \text{lim\_t\_o2\_2}) * \text{lim\_t\_no3\_3} * \text{lim\_t\_sed\_1\_22}$                                                                                                                                                                                                                               |
| <p>recycling of sedimentary detritus to ammonium using sulfate (sulfate reduction) (index 1 to 6) (sediment only) [mol/m<sup>2</sup>/day]</p> $(1.0 + \text{rfr\_pc\_enrichment\_det} * 6.625) * \text{h3oplus} + \text{rfr\_pc\_enrichment\_det} * 3.3125 * \text{t\_so4} + \text{t\_sed\_1} \rightarrow (1.0 + \text{rfr\_pc\_enrichment\_det} * 13.25) * \text{h2o} + \text{rfr\_pc\_enrichment\_det} * 3.3125 * \text{t\_h2s} + \text{rfr\_pc\_enrichment\_det} * \text{rfr\_c} * \text{t\_dic} + \text{t\_nh4} + \text{rfr\_si} * \text{t\_sil}$ $\text{p\_sed\_1\_sulf\_nh4} = (\text{t\_sed\_1} * \text{r\_det\_1\_rec} * \exp(\text{q10\_det\_rec} * \text{cgt\_temp})) * \max(\text{t\_so4}, 0.0) / (\max(\text{t\_so4}, 0.0) + \text{so4\_min\_det\_sulf}) * \text{pH\_inhibition\_ironred} * (1.0 - \text{lim\_t\_o2\_2}) * (1.0 - \text{lim\_t\_no3\_3}) * (1.0 - \text{lim\_t\_ihs\_4}) * (1.0 - \text{lim\_t\_mos\_5}) * (1.0 - \text{lim\_t\_i3i\_6}) * \text{lim\_t\_so4\_28} * \text{lim\_t\_sed\_1\_22}$ |
| <p>recycling of sedimentary detritus to ammonium using manganese oxide (manganese reduction) (index 1 to 6) (sediment only) [mol/m<sup>2</sup>/day]</p> $\text{t\_sed\_1} + (1.0 + 26.5 * \text{rfr\_pc\_enrichment\_det}) * \text{h3oplus} + 13.25 * \text{rfr\_pc\_enrichment\_det} * \text{t\_mos} \rightarrow \text{rfr\_si} * \text{t\_sil} + (1.0 + 46.375 * \text{rfr\_pc\_enrichment\_det}) * \text{h2o} + 13.25 * \text{rfr\_pc\_enrichment\_det} * \text{t\_mn2} + \text{t\_nh4} + \text{rfr\_pc\_enrichment\_det} * \text{rfr\_c} * \text{t\_dic}$ $\text{p\_sed\_1\_mnred\_mn2} = (\text{t\_sed\_1} * \text{r\_det\_1\_rec} * \exp(\text{q10\_det\_rec} * \text{cgt\_temp})) * \text{pH\_inhibition\_ironred} * (1.0 - \text{lim\_t\_o2\_2}) * (1.0 - \text{lim\_t\_no3\_3}) * \text{lim\_t\_mos\_5} * \text{lim\_t\_sed\_1\_22}$                                                                                                                                                                              |
| <p>recycling of sedimentary detritus to ammonium using iron hydroxide (iron reduction) (index 1 to 6) (sediment only) [mol/m<sup>2</sup>/day]</p> $26.5 * \text{rfr\_pc\_enrichment\_det} * \text{t\_h2s} + 26.5 * \text{rfr\_pc\_enrichment\_det} * \text{t\_ihs} + \text{h3oplus} + \text{t\_sed\_1} \rightarrow \text{rfr\_pc\_enrichment\_det} * \text{rfr\_c} * \text{t\_dic} + \text{t\_nh4} + 26.5 * \text{rfr\_pc\_enrichment\_det} * \text{t\_ims} + (1.0 + 72.875 * \text{rfr\_pc\_enrichment\_det}) * \text{h2o} + \text{rfr\_si} * \text{t\_sil}$                                                                                                                                                                                                                                                                                                                                                                                                                                                              |
| continued on next page...                                                                                                                                                                                                                                                                                                                                                                                                                                                                                                                                                                                                                                                                                                                                                                                                                                                                                                                                                                                                  |

## Processes, continued from previous page

```
p_sed_1_irred_ims = (t_sed_1*r_det_1_rec*exp(q10_det_rec*cgt_temp)*
    t_ihs/max(fe3_sed,epsilon)*fe2_ims_is_smallest*
    pH_inhibition_ironred)*(1.0-lim_t_o2_2)*(1.0-lim_t_no3_3)*
    (1.0-lim_t_mos_5)*lim_t_ihs_4*lim_t_h2s_29*lim_t_sed_1_22
```

recycling of sedimentary detritus to ammonium using iron phosphate (iron reduction) (index 1 to 6) (sediment only) [mol/m<sup>2</sup>/day]

```
26.5*rfr_pc_enrichment_det*t_ips + (1.0+159.1875*rfr_pc_enrichment_det)*h3oplus
+ 86.125*rfr_pc_enrichment_det*h2o + t_sed_1 + 26.5*rfr_pc_enrichment_det*t_h2s
-> rfr_si*t_sil + rfr_pc_enrichment_det*rfr_c*t_dic + t_nh4 + 26.5*
rfr_pc_enrichment_det*t_ims + h2o + 26.5*rfr_pc_enrichment_det*t_po4 +
238.6875*rfr_pc_enrichment_det*h3oplus
    (t_sed_1*r_det_1_rec*exp(q10_det_rec*cgt_temp)*
p_sed_1_irredips_imst_ips/max(fe3_sed,epsilon)*fe2_ims_is_smallest*
=
    pH_inhibition_ironred)*(1.0-lim_t_o2_2)*(1.0-lim_t_no3_3)*
    (1.0-lim_t_mos_5)*lim_t_ihs_4*lim_t_ips_52*lim_t_sed_1_22*
    lim_t_h2s_29
```

recycling of sedimentary detritus to ammonium using iron hydroxide (iron reduction) (index 1 to 6) (sediment only) [mol/m<sup>2</sup>/day]

```
53.0*rfr_pc_enrichment_det*h3oplus + t_sed_1 + h3oplus + 26.5*
rfr_pc_enrichment_det*t_ihs + 53*rfr_pc_enrichment_det*ohminus -> rfr_si*t_sil
+ 125.875*rfr_pc_enrichment_det*h2o + h2o + 26.5*rfr_pc_enrichment_det*t_iim +
t_nh4 + rfr_pc_enrichment_det*rfr_c*t_dic
p_sed_1_irred_iim = (t_sed_1*r_det_1_rec*exp(q10_det_rec*cgt_temp)*
    t_ihs/max(fe3_sed,epsilon)*fe2_iim_is_smallest*
    pH_inhibition_ironred)*(1.0-lim_t_o2_2)*(1.0-lim_t_no3_3)*
    (1.0-lim_t_mos_5)*lim_t_ihs_4*lim_t_sed_1_22
```

recycling of sedimentary detritus to ammonium using iron hydroxide (iron reduction) (index 1 to 6) (sediment only) [mol/m<sup>2</sup>/day]

```
26.5*rfr_pc_enrichment_det*t_ips + t_sed_1 + (1+53.0*rfr_pc_enrichment_det)*
h3oplus + 33.125*rfr_pc_enrichment_det*h2o + 53*rfr_pc_enrichment_det*ohminus -
> rfr_si*t_sil + rfr_pc_enrichment_det*rfr_c*t_dic + rfr_pc_enrichment_det*
26.5*t_po4 + t_nh4 + 26.5*rfr_pc_enrichment_det*t_iim + h2o + 79.5*
rfr_pc_enrichment_det*h3oplus
    (t_sed_1*r_det_1_rec*exp(q10_det_rec*cgt_temp)*
p_sed_1_irredips_iimt_ips/max(fe3_sed,epsilon)*fe2_iim_is_smallest*
=
    pH_inhibition_ironred)*(1.0-lim_t_o2_2)*(1.0-lim_t_no3_3)*
    (1.0-lim_t_mos_5)*lim_t_ihs_4*lim_t_ips_52*lim_t_sed_1_22
```

recycling of sedimentary detritus to ammonium using iron-III in clay minerals (iron reduction) (index 1 to 6) (sediment only) [mol/m<sup>2</sup>/day]

continued on next page...

## Processes, continued from previous page

```

t_sed_1 + h3oplus + 26.5*rfr_pc_enrichment_det*t_i3i -> rfr_si*t_sil + (1.0+
19.875*rfr_pc_enrichment_det)*h2o + 26.5*rfr_pc_enrichment_det*i2i + t_nh4 +
rfr_pc_enrichment_det*rfr_c*t_dic
p_i3i_1_irred_i2i = (t_sed_1*r_det_1_rec*exp(q10_det_rec*cgt_temp)*
pH_inhibition_ironred)*(1.0-lim_t_o2_2)*(1.0-lim_t_no3_3)*
(1.0-lim_t_mos_5)*(1.0-lim_t_ihs_4)*lim_t_i3i_6*
lim_t_sed_1_22

```

## recycling of sediment detrital phosphate (index 1 to 6) (sediment only)

[mol/m<sup>2</sup>/day]

```

t_sedp_1 + 3*rfr_pc_enrichment_det*rfr_p*h2o -> 3*rfr_pc_enrichment_det*rfr_p*
h3oplus + rfr_pc_enrichment_det*rfr_p*t_po4
p_sedp_1_remin_po4 (t_sedp_1*r_det_1_rec*exp(q10_det_rec*cgt_temp)*(1.0+
= (factor_pref_remin_p-1.0)*o2_min_sed_resp/(t_o2 +
o2_min_sed_resp)))*lim_t_sedp_1_46

```

## Auxiliary variables

## absolute temperature [K]

```
temp_k = cgt_temp + 273.15
```

## temporary value assumed for pH [1]

```
ph_temp = 0.0-log(min(max(h3o,1.0e-12),1.0e-2))/log(10.0)
```

calculated iteratively, 10 iterations, initial value = 0.0

self-ionization constant of Water [mol<sup>2</sup>/kg<sup>2</sup>]

```

k_water = exp( -13847.26 / temp_k + 148.96502 - 23.6521 * log(temp_k)
+ (118.67/temp_k - 5.977 + 1.0495 * log(temp_k)) *
sqrt(cgt_sali) - 0.01615 * cgt_sali)

```

Acid dissociation constant CO<sub>2</sub> + 2 H<sub>2</sub>O <-> HCO<sub>3</sub><sup>-</sup> + H<sub>3</sub>O<sup>+</sup> [mol/kg]

```

k1_co2 = power(10.0,( -3633.86 / temp_k + 61.2172 - 9.6777 *
log(temp_k) + 0.011555 * cgt_sali - 0.0001152 * cgt_sali *
cgt_sali))

```

Acid dissociation constant HCO<sub>3</sub><sup>-</sup> + H<sub>2</sub>O <-> [CO<sub>3</sub> 2<sup>-</sup>] + H<sub>3</sub>O<sup>+</sup> [mol/kg]

```

k2_co2 = power(10.0,( -471.78 / temp_k - 25.929 + 3.16967 *
log(temp_k)+ 0.01781 * cgt_sali - 0.0001122 * cgt_sali *
cgt_sali))

```

## Acid dissociation constant of boric acid [mol/kg]

```

k_boron = exp(( -8966.9 - 2890.53*sqrt(cgt_sali) - 77.942*cgt_sali +
1.728*cgt_sali*sqrt(cgt_sali) - 0.0996*cgt_sali*cgt_sali) /
temp_k + 148.0248 + 137.1942*sqrt(cgt_sali) + 1.62142*
cgt_sali + (-24.4344 - 25.085*sqrt(cgt_sali) - 0.2474*
cgt_sali)*log(temp_k) + 0.053105*sqrt(cgt_sali)*temp_k )

```

continued on next page...

## Auxiliary variables, continued from previous page

**Acid dissociation constant  $\text{H}_3\text{PO}_4 + \text{H}_2\text{O} \rightleftharpoons [\text{H}_2\text{PO}_4^-] + \text{H}_3\text{O}^+$  [mol/kg]**

$$k1\_po4 = \exp(-4576.752/\text{temp\_k} + 115.525 - 18.453 \cdot \log(\text{temp\_k}) + (0.69171 - 106.736/\text{temp\_k}) \cdot \sqrt{\text{cgt\_sali}} - (0.01844 + 0.65643/\text{temp\_k}) \cdot \text{cgt\_sali})$$

**Acid dissociation constant  $[\text{H}_2\text{PO}_4^-] + \text{H}_2\text{O} \rightleftharpoons [\text{HPO}_4^{2-}] + \text{H}_3\text{O}^+$  [mol/kg]**

$$k2\_po4 = \exp(-8814.715/\text{temp\_k} + 172.0883 - 27.927 \cdot \log(\text{temp\_k}) + (1.35660 - 160.340/\text{temp\_k}) \cdot \sqrt{\text{cgt\_sali}} - (0.05778 - 0.37335/\text{temp\_k}) \cdot \text{cgt\_sali})$$

**Acid dissociation constant  $[\text{HPO}_4^{2-}] + \text{H}_2\text{O} \rightleftharpoons [\text{PO}_4^{3-}] + \text{H}_3\text{O}^+$  [mol/kg]**

$$k3\_po4 = \exp(-3070.75/\text{temp\_k} - 18.141 + (2.81197 + 17.27039/\text{temp\_k}) \cdot \sqrt{\text{cgt\_sali}} - (0.09984 + 44.99486/\text{temp\_k}) \cdot \text{cgt\_sali})$$

**Acid dissociation constant  $\text{H}_2\text{S} + \text{H}_2\text{O} \rightleftharpoons \text{HS}^- + \text{H}_3\text{O}^+$  [mol/kg]**

$$k1\_h2s = \exp(-3131.42/\text{temp\_k} - 5.818 + 0.368 \cdot (\text{power}(\max(0.0, \text{cgt\_sali}), (1.0/3.0))))$$

**total concentration of boron [mol/kg]**

$$\text{boron\_total} = 0.000416 \cdot \text{cgt\_sali}/35.0$$

**boron alkalinity [mol/kg]**

$$\text{alk\_boron} = \text{boron\_total} \cdot k\_boron / (k\_boron + h3o)$$

calculated iteratively, 10 iterations, initial value = 0.0

**hydrogen sulfide alkalinity [mol/kg]**

$$\text{alk\_h2s} = t\_h2s \cdot k1\_h2s / (k1\_h2s + h3o)$$

calculated iteratively, 10 iterations, initial value = 0.0

**water alkalinity [mol/kg]**

$$\text{alk\_water} = k\_water / h3o - h3o$$

calculated iteratively, 10 iterations, initial value = 0.0

**denominator in phosphate alkalinity formula [mol<sup>3</sup>/kg<sup>3</sup>]**

$$\text{alk\_po4\_denominator} = (h3o \cdot h3o \cdot h3o + k1\_po4 \cdot h3o \cdot h3o + k1\_po4 \cdot k2\_po4 \cdot h3o + k1\_po4 \cdot k2\_po4 \cdot k3\_po4)$$

calculated iteratively, 10 iterations, initial value = 0.0

**phosphate alkalinity [mol/kg]**

$$\text{alk\_po4} = (t\_po4 \cdot (k1\_po4 \cdot k2\_po4 \cdot h3o + 2.0 \cdot k1\_po4 \cdot k2\_po4 \cdot k3\_po4 - h3o \cdot h3o \cdot h3o)) / \text{alk\_po4\_denominator}$$

calculated iteratively, 10 iterations, initial value = 0.0

continued on next page...

### Auxiliary variables, continued from previous page

#### denominator in carbonate alkalinity formula [mol<sup>2</sup>/kg<sup>2</sup>]

```
alk_co2_denominator (h3o*h3o + k1_co2*h3o + k1_co2*k2_co2)
=
calculated iteratively, 10 iterations, initial value = 0.0
```

#### carbonate alkalinity [mol/kg]

```
alk_co2 = t_dic*k1_co2*(h3o+2*k2_co2)/alk_co2_denominator
calculated iteratively, 10 iterations, initial value = 0.0
```

#### error in total alkalinity calculation at the assumed pH [mol/kg]

```
alk_residual = t_alk - alk_co2 - alk_po4 - alk_boron - alk_h2s - alk_water
calculated iteratively, 10 iterations, initial value = 0.0
```

#### derivative of phosphate alkalinity with respect to h3o [1]

```
dalkp_dh3o = t_po4*(0.0-k1_po4*h3o*h3o*h3o-h3o-4*k1_po4*k2_po4*h3o*h3o*
h3o-(k1_po4*k1_po4*k2_po4+9*k1_po4*k2_po4*k3_po4)*h3o*h3o-
4*k1_po4*k1_po4*k2_po4*k3_po4*h3o-k1_po4*k1_po4*k2_po4*
k2_po4*k3_po4)/(alk_po4_denominator*alk_po4_denominator)
calculated iteratively, 10 iterations, initial value = 0.0
```

#### derivative of carbonate alkalinity with respect to h3o [1]

```
dalkc_dh3o = t_dic*(0.0-k1_co2*h3o*h3o-k1_co2*k1_co2*k2_co2-4*k1_co2*
k2_co2*h3o)/(alk_co2_denominator*alk_co2_denominator)
calculated iteratively, 10 iterations, initial value = 0.0
```

#### derivative of residual\_alk with respect to pH [mol/kg]

```
dalkresidual_dpH = 0.0-log(10.0)*h3o*(alk_boron/(k_boron+h3o)+alk_h2s/(k1_h2s+
h3o)+k_water/(h3o*h3o)+1-dalkp_dh3o-dalkc_dh3o)
calculated iteratively, 10 iterations, initial value = 0.0
```

#### newly determined pH value [1]

```
temp1 = alk_residual/dalkresidual_dpH
ph = ph_temp - temp1 + theta(abs(temp1) - 1)*0.5*temp1
calculated iteratively, 10 iterations, initial value = 0.0
```

#### h3o ion concentration [mol/kg]

```
h3o = power(10.0,0.0-max(1.0,min(13.0,ph)))
calculated iteratively, 10 iterations, initial value = 1.0e-8
```

#### Acid dissociation constant H2S + H2O <-> HS- + H3O+ [mol/kg]

```
k1_h2s_sed = exp( -3131.42/temp_k - 5.818 + 0.368*
(power(max(0.0,cgt_sali),(1.0/3.0))))
```

#### iron hydroxide half-saturation constant converted to [mol/m<sup>2</sup>]

continued on next page...

| Auxiliary variables, continued from previous page                                                   |                                                             |
|-----------------------------------------------------------------------------------------------------|-------------------------------------------------------------|
| ih <sub>s</sub> _min_sed_irred_2d                                                                   | ih <sub>s</sub> _min_sed_irred*cgt_cellheight*cgt_density   |
| =                                                                                                   |                                                             |
| manganese oxide half-saturation constant converted to [mol/m <sup>2</sup> ]                         |                                                             |
| mos_min_sed_irred_2d                                                                                | mos_min_sed_irred*cgt_cellheight*cgt_density                |
| =                                                                                                   |                                                             |
| sum of Fe-III in the sediment [mol/m <sup>2</sup> ]                                                 |                                                             |
| fe3_sed =                                                                                           | t_ips+t_ihs                                                 |
| ionic strength of the solution [mol/kg]                                                             |                                                             |
| ionic_strength =                                                                                    | 0.02*cgt_sali                                               |
| dielectric constant of seawater [F/m]                                                               |                                                             |
| temp1 =                                                                                             | cgt_sali*(1.707e-2+1.205e-5*cgt_sali+4.058e-9*              |
|                                                                                                     | power(cgt_sali,2.0))                                        |
| temp2 =                                                                                             | 1.0-0.2551*temp1+5.151e-2*temp1*temp1-6.889e-3*temp1*temp1* |
|                                                                                                     | temp1                                                       |
| temp3 =                                                                                             | 87.74-0.40008*temp_k+9.398e-4*temp_k*temp_k+1.401e-6*       |
|                                                                                                     | temp_k*temp_k*temp_k                                        |
| dielectric_constant                                                                                 | temp2*temp3                                                 |
| =                                                                                                   |                                                             |
| concentration of HS <sup>-</sup> ions [mol/kg]                                                      |                                                             |
| hsminus =                                                                                           | t_h2s * k1_h2s_sed / (k1_h2s_sed + h3o)                     |
| parameter A for the Davies formula [mol <sup>0.5</sup> l <sup>-0.5</sup> ]                          |                                                             |
| davies_parameter_a                                                                                  | 1.82e6*power(dielectric_constant*temp_k,-1.5)               |
| =                                                                                                   |                                                             |
| activity to concentration ratio of ions with a charge of +1/-1 [1]                                  |                                                             |
| activity_coefficient/(1+sqrt(ionic_strength))-0.3*ionic_strength)                                   | power(10.0,0.0-davies_parameter_a*1*(sqrt(ionic_strength)   |
| =                                                                                                   |                                                             |
| activity to concentration ratio of ions with a charge of +2/-2 [1]                                  |                                                             |
| activity_coefficient/(1+sqrt(ionic_strength))-0.3*ionic_strength)                                   | power(10.0,0.0-davies_parameter_a*2*(sqrt(ionic_strength)   |
| =                                                                                                   |                                                             |
| activity of H <sub>3</sub> O <sup>+</sup> ions (concentration corrected by ionic strength) [mol/kg] |                                                             |
| activity_h3oplus =                                                                                  | h3o*activity_coefficient_1                                  |
| Fe-II concentration in equilibrium with iron monosulfide precipitation [mol/kg]                     |                                                             |
| fe2_eq_ims =                                                                                        | power(10.0,-2.95)*activity_h3oplus/max(hsminus*             |
|                                                                                                     | activity_coefficient_1,1.0e-3*epsilon)                      |
|                                                                                                     | /activity_coefficient_2                                     |
| continued on next page...                                                                           |                                                             |



### Auxiliary variables, continued from previous page

**Fe-II concentration in equilibrium with iron adsorbed to illite-montmorillonite mixed layer minerals [mol/kg]**

```
temp1 = 2.7 * max(vol_fraction_im*(1.0-POR),epsilon)
fe2_eq_iim = (max(t_iim,epsilon)/cgt_cellheight/cgt_density)/(100*temp1)
+1000*(1.0-cgt_in_sediment)
```

**siderite is the favoured species for precipitation (0 or 1) [1]**

```
fe2_ims_is_smallest theta(fe2_eq_iim-fe2_eq_ims)
=
```

**minnesotaite is the favoured species for precipitation (0 or 1) [1]**

```
fe2_iim_is_smallest theta(fe2_eq_ims-fe2_eq_iim)
=
```

**factor for inhibition of iron / sulfate reduction at large pH [1]**

```
1.0+0.0*(theta(pH_opt_ironred-pH)+theta(pH-pH_opt_ironred)*
ph_inhibition_ironredmax((pH_max_ironred-pH)/(pH_max_ironred-pH_opt_ironred)
= ,0.0))
```

### Constants

**no division by 0**

```
epsilon = 4.5E-17
```

**iron hydroxide half-saturation concentration for detritus remineralization by iron reduction [mol/kg]**

```
ihs_min_sed_irred = 0.0065
```

**iron hydroxide half-saturation concentration for detritus remineralization by iron reduction [mol/kg]**

```
mos_min_sed_irred = 0.0004
```

**nitrate half-saturation concentration for denitrification in the water column [mol/kg]**

```
no3_min_sed_denit = 4.0E-6
```

**oxygen half-saturation constant for recycling of sediment detritus using oxygen [mol/kg]**

```
o2_min_sed_resp = 2.0E-5
```

**q10 rule factor for recycling [1/K]**

```
q10_det_rec = 0.15
```

**redfield ratio C/N**

```
rfr_c = 6.625
```

continued on next page...

---

 Constants, continued from previous page
 

---

**redfield ratio P/N**

rfr\_p = 0.0625

**enrichment factor for P and C in detritus [1]**
 1.5  
 rfr\_pc\_enrichment\_de  
 =
**minimum sulfate concentration for sulfate reduction [mol/kg]**

so4\_min\_det\_sulf = 1.0E-6

**detritus recycling rates [1/d]**

r\_det\_1\_rec = 0.0647

**detritus recycling rates [1/d]**

r\_det\_2\_rec = 0.00924

**detritus recycling rates [1/d]**

r\_det\_3\_rec = 0.00136

**detritus recycling rates [1/d]**

r\_det\_4\_rec = 0.000108

**detritus recycling rates [1/d]**

r\_det\_5\_rec = 1.62E-5

**detritus recycling rates [1/d]**

r\_det\_6\_rec = 0.0

**porosity**

por = 0.77

**optimal pH for iron reduction [1]**

pH\_opt\_ironred = 7.2

**maximum pH for iron reduction [1]**

pH\_max\_ironred = 20.0

**average ratio Si/N [1]**

rfr\_si = 0.9375

**fraction of illite-montmorillonite mixed layer minerals on volume of all minerals [1]**

vol\_fraction\_im = 0.5

---

 continued on next page...
 

---

| Constants, continued from previous page                                                             |                                                  |
|-----------------------------------------------------------------------------------------------------|--------------------------------------------------|
| acceleration factor for preferential mineralization of P compared to N under hypoxic conditions [1] |                                                  |
| factor_pref_remin_p                                                                                 | 10.0                                             |
| =                                                                                                   |                                                  |
| Process limitation factors                                                                          |                                                  |
| lim_t_o2_2 =                                                                                        | $1.0 - \exp(-t_{o2}/o2_{min\_sed\_resp})$        |
| lim_t_o2_12 =                                                                                       | $\theta(t_{o2} - 0.0)$                           |
| lim_t_no3_3 =                                                                                       | $1.0 - \exp(-t_{no3}/no3_{min\_sed\_denit})$     |
| lim_t_h2s_29 =                                                                                      | $\theta(t_{h2s} - 0.0)$                          |
| lim_t_ips_52 =                                                                                      | $\theta(t_{ips} - 0.0)$                          |
| lim_t_so4_28 =                                                                                      | $\theta(t_{so4} - 0.0)$                          |
| lim_t_sed_1_22 =                                                                                    | $\theta(t_{sed\_1} - 0.0)$                       |
| lim_t_sed_2_23 =                                                                                    | $\theta(t_{sed\_2} - 0.0)$                       |
| lim_t_sed_3_24 =                                                                                    | $\theta(t_{sed\_3} - 0.0)$                       |
| lim_t_sed_4_25 =                                                                                    | $\theta(t_{sed\_4} - 0.0)$                       |
| lim_t_sed_5_26 =                                                                                    | $\theta(t_{sed\_5} - 0.0)$                       |
| lim_t_sed_6_27 =                                                                                    | $\theta(t_{sed\_6} - 0.0)$                       |
| lim_t_ihs_4 =                                                                                       | $1.0 - \exp(-t_{ihs}/ihs_{min\_sed\_irred\_2d})$ |
| lim_t_mos_5 =                                                                                       | $1.0 - \exp(-t_{mos}/mos_{min\_sed\_irred\_2d})$ |
| lim_t_i3i_6 =                                                                                       | $1.0 - \exp(-t_{i3i}/ihs_{min\_sed\_irred\_2d})$ |
| lim_t_sedp_1_46 =                                                                                   | $\theta(t_{sedp\_1} - 0.0)$                      |
| lim_t_sedp_2_47 =                                                                                   | $\theta(t_{sedp\_2} - 0.0)$                      |
| lim_t_sedp_3_48 =                                                                                   | $\theta(t_{sedp\_3} - 0.0)$                      |
| lim_t_sedp_4_49 =                                                                                   | $\theta(t_{sedp\_4} - 0.0)$                      |
| continued on next page...                                                                           |                                                  |

## Process limitation factors, continued from previous page

```
lim_t_sedp_5_50 = theta(t_sedp_5-0.0)
```

```
lim_t_sedp_6_51 = theta(t_sedp_6-0.0)
```

### 3.3 Process type BGC/benthic/precipitation

| Processes                                                                                                          |                                                                                                                                                                                                                                                                                                           |
|--------------------------------------------------------------------------------------------------------------------|-----------------------------------------------------------------------------------------------------------------------------------------------------------------------------------------------------------------------------------------------------------------------------------------------------------|
| <b>transformation of amorphous iron oxyhydroxides to crystalline phase (sediment only) [mol/m<sup>2</sup>/day]</b> |                                                                                                                                                                                                                                                                                                           |
| t_ihs -> t_ihc                                                                                                     |                                                                                                                                                                                                                                                                                                           |
| p_ihs_trans_ihc =                                                                                                  | (r_ihs_trans_ihc*t_ihs)*lim_t_ihs_53                                                                                                                                                                                                                                                                      |
| <b>manganese-II precipitation to rhodochrosite (sediment only) [mol/m<sup>2</sup>/day]</b>                         |                                                                                                                                                                                                                                                                                                           |
| 4.8*h2o + 0.6*t_ca2 + t_mn2 + 1.6*t_dic -> t_rho + 3.2*h3oplus                                                     |                                                                                                                                                                                                                                                                                                           |
| p_mn2_prec_rho =                                                                                                   | (0.1*t_mn2*theta(saturation_rhodochrosite-1.0)*<br>cgt_in_sediment*cgt_cellheight*cgt_density)*lim_t_ca2_56*<br>lim_t_mn2_62*lim_t_dic_13                                                                                                                                                                 |
| Auxiliary variables                                                                                                |                                                                                                                                                                                                                                                                                                           |
| <b>absolute temperature [K]</b>                                                                                    |                                                                                                                                                                                                                                                                                                           |
| temp_k =                                                                                                           | cgt_temp + 273.15                                                                                                                                                                                                                                                                                         |
| <b>temporary value assumed for pH [1]</b>                                                                          |                                                                                                                                                                                                                                                                                                           |
| ph_temp =                                                                                                          | 0.0-log(min(max(h3o,1.0e-12),1.0e-2))/log(10.0)                                                                                                                                                                                                                                                           |
| calculated iteratively, 10 iterations, initial value = 0.0                                                         |                                                                                                                                                                                                                                                                                                           |
| <b>self-ionization constant of Water [mol<sup>2</sup>/kg<sup>2</sup>]</b>                                          |                                                                                                                                                                                                                                                                                                           |
| k_water =                                                                                                          | exp( -13847.26 / temp_k + 148.96502 - 23.6521 * log(temp_k)<br>+ (118.67/temp_k - 5.977 + 1.0495 * log(temp_k)) *<br>sqrt(cgt_sali) - 0.01615 * cgt_sali)                                                                                                                                                 |
| <b>Solubility of CO2 [mol/kg/Pa]</b>                                                                               |                                                                                                                                                                                                                                                                                                           |
| k0_co2 =                                                                                                           | exp(9345.17 / temp_k - 60.2409 + 23.3585 * (log(temp_k) -<br>4.605170186) + cgt_sali*(0.023517 - 0.00023656 * temp_k +<br>0.00000047036 *temp_k*temp_k))/101325.0                                                                                                                                         |
| <b>Acid dissociation constant CO2 + 2 H2O &lt;-&gt; HCO3- + H3O+ [mol/kg]</b>                                      |                                                                                                                                                                                                                                                                                                           |
| k1_co2 =                                                                                                           | power(10.0,( -3633.86 / temp_k + 61.2172 - 9.6777 *<br>log(temp_k) + 0.011555 * cgt_sali - 0.0001152 * cgt_sali *<br>cgt_sali))                                                                                                                                                                           |
| <b>Acid dissociation constant HCO3- + H2O &lt;-&gt; [CO3 2-] + H3O+ [mol/kg]</b>                                   |                                                                                                                                                                                                                                                                                                           |
| k2_co2 =                                                                                                           | power(10.0,( -471.78 / temp_k - 25.929 + 3.16967 *<br>log(temp_k) + 0.01781 * cgt_sali - 0.0001122 * cgt_sali *<br>cgt_sali))                                                                                                                                                                             |
| <b>Acid dissociation constant of boric acid [mol/kg]</b>                                                           |                                                                                                                                                                                                                                                                                                           |
| k_boron =                                                                                                          | exp(( -8966.9 - 2890.53*sqrt(cgt_sali) - 77.942*cgt_sali +<br>1.728*cgt_sali*sqrt(cgt_sali) - 0.0996*cgt_sali*cgt_sali) /<br>temp_k + 148.0248 + 137.1942*sqrt(cgt_sali) + 1.62142*<br>cgt_sali + (-24.4344 - 25.085*sqrt(cgt_sali) - 0.2474*<br>cgt_sali)*log(temp_k) + 0.053105*sqrt(cgt_sali)*temp_k ) |
| continued on next page...                                                                                          |                                                                                                                                                                                                                                                                                                           |

## Auxiliary variables, continued from previous page

**Acid dissociation constant  $\text{H}_3\text{PO}_4 + \text{H}_2\text{O} \rightleftharpoons [\text{H}_2\text{PO}_4^-] + \text{H}_3\text{O}^+$  [mol/kg]**

$$k1\_po4 = \exp(-4576.752/\text{temp\_k} + 115.525 - 18.453 \cdot \log(\text{temp\_k}) + (0.69171 - 106.736/\text{temp\_k}) \cdot \sqrt{\text{cgt\_sali}} - (0.01844 + 0.65643/\text{temp\_k}) \cdot \text{cgt\_sali})$$

**Acid dissociation constant  $[\text{H}_2\text{PO}_4^-] + \text{H}_2\text{O} \rightleftharpoons [\text{HPO}_4^{2-}] + \text{H}_3\text{O}^+$  [mol/kg]**

$$k2\_po4 = \exp(-8814.715/\text{temp\_k} + 172.0883 - 27.927 \cdot \log(\text{temp\_k}) + (1.35660 - 160.340/\text{temp\_k}) \cdot \sqrt{\text{cgt\_sali}} - (0.05778 - 0.37335/\text{temp\_k}) \cdot \text{cgt\_sali})$$

**Acid dissociation constant  $[\text{HPO}_4^{2-}] + \text{H}_2\text{O} \rightleftharpoons [\text{PO}_4^{3-}] + \text{H}_3\text{O}^+$  [mol/kg]**

$$k3\_po4 = \exp(-3070.75/\text{temp\_k} - 18.141 + (2.81197 + 17.27039/\text{temp\_k}) \cdot \sqrt{\text{cgt\_sali}} - (0.09984 + 44.99486/\text{temp\_k}) \cdot \text{cgt\_sali})$$

**Acid dissociation constant  $\text{H}_2\text{S} + \text{H}_2\text{O} \rightleftharpoons \text{HS}^- + \text{H}_3\text{O}^+$  [mol/kg]**

$$k1\_h2s = \exp(-3131.42/\text{temp\_k} - 5.818 + 0.368 \cdot (\text{power}(\max(0.0, \text{cgt\_sali}), (1.0/3.0))))$$

**total concentration of boron [mol/kg]**

$$\text{boron\_total} = 0.000416 \cdot \text{cgt\_sali}/35.0$$

**boron alkalinity [mol/kg]**

$$\text{alk\_boron} = \text{boron\_total} \cdot k\_boron / (k\_boron + h3o)$$

calculated iteratively, 10 iterations, initial value = 0.0

**hydrogen sulfide alkalinity [mol/kg]**

$$\text{alk\_h2s} = t\_h2s \cdot k1\_h2s / (k1\_h2s + h3o)$$

calculated iteratively, 10 iterations, initial value = 0.0

**water alkalinity [mol/kg]**

$$\text{alk\_water} = k\_water / h3o - h3o$$

calculated iteratively, 10 iterations, initial value = 0.0

**denominator in phosphate alkalinity formula [mol<sup>3</sup>/kg<sup>3</sup>]**

$$\text{alk\_po4\_denominator} = (h3o \cdot h3o \cdot h3o + k1\_po4 \cdot h3o \cdot h3o + k1\_po4 \cdot k2\_po4 \cdot h3o + k1\_po4 \cdot k2\_po4 \cdot k3\_po4)$$

calculated iteratively, 10 iterations, initial value = 0.0

**phosphate alkalinity [mol/kg]**

$$\text{alk\_po4} = (t\_po4 \cdot (k1\_po4 \cdot k2\_po4 \cdot h3o + 2.0 \cdot k1\_po4 \cdot k2\_po4 \cdot k3\_po4 - h3o \cdot h3o \cdot h3o)) / \text{alk\_po4\_denominator}$$

calculated iteratively, 10 iterations, initial value = 0.0

continued on next page...

### Auxiliary variables, continued from previous page

#### denominator in carbonate alkalinity formula [mol<sup>2</sup>/kg<sup>2</sup>]

alk\_co2\_denominator (h3o\*h3o + k1\_co2\*h3o + k1\_co2\*k2\_co2)  
=  
calculated iteratively, 10 iterations, initial value = 0.0

#### carbonate alkalinity [mol/kg]

alk\_co2 = t\_dic\*k1\_co2\*(h3o+2\*k2\_co2)/alk\_co2\_denominator  
calculated iteratively, 10 iterations, initial value = 0.0

#### error in total alkalinity calculation at the assumed pH [mol/kg]

alk\_residual = t\_alk - alk\_co2 - alk\_po4 - alk\_boron - alk\_h2s - alk\_water  
calculated iteratively, 10 iterations, initial value = 0.0

#### derivative of phosphate alkalinity with respect to h3o [1]

dalkp\_dh3o = t\_po4\*(0.0-k1\_po4\*h3o\*h3o\*h3o-h3o-4\*k1\_po4\*k2\_po4\*h3o\*h3o\*  
h3o-(k1\_po4\*k1\_po4\*k2\_po4+9\*k1\_po4\*k2\_po4\*k3\_po4)\*h3o\*h3o-  
4\*k1\_po4\*k1\_po4\*k2\_po4\*k3\_po4\*h3o-k1\_po4\*k1\_po4\*k2\_po4\*  
k2\_po4\*k3\_po4)/(alk\_po4\_denominator\*alk\_po4\_denominator)  
calculated iteratively, 10 iterations, initial value = 0.0

#### derivative of carbonate alkalinity with respect to h3o [1]

dalkc\_dh3o = t\_dic\*(0.0-k1\_co2\*h3o\*h3o-k1\_co2\*k1\_co2\*k2\_co2-4\*k1\_co2\*  
k2\_co2\*h3o)/(alk\_co2\_denominator\*alk\_co2\_denominator)  
calculated iteratively, 10 iterations, initial value = 0.0

#### derivative of residual\_alk with respect to pH [mol/kg]

dalkresidual\_dpH = 0.0-log(10.0)\*h3o\*(alk\_boron/(k\_boron+h3o)+alk\_h2s/(k1\_h2s+  
h3o)+k\_water/(h3o\*h3o)+1-dalkp\_dh3o-dalkc\_dh3o)  
calculated iteratively, 10 iterations, initial value = 0.0

#### newly determined pH value [1]

temp1 = alk\_residual/dalkresidual\_dpH  
ph = ph\_temp - temp1 + theta(abs(temp1) - 1)\*0.5\*temp1  
calculated iteratively, 10 iterations, initial value = 0.0

#### h3o ion concentration [mol/kg]

h3o = power(10.0,0.0-max(1.0,min(13.0,ph)))  
calculated iteratively, 10 iterations, initial value = 1.0e-8

#### co2 partial pressure [Pa]

pco2 = t\_dic / k0\_co2 / (1 + k1\_co2/h3o + k1\_co2\*k2\_co2/h3o/h3o)

#### ionic strength of the solution [mol/kg]

ionic\_strength = 0.02\*cgt\_sali

continued on next page...

### Auxiliary variables, continued from previous page

#### dielectric constant of seawater [F/m]

```
temp1 = cgt_sali*(1.707e-2+1.205e-5*cgt_sali+4.058e-9*
          power(cgt_sali,2.0))
temp2 = 1.0-0.2551*temp1+5.151e-2*temp1*temp1-6.889e-3*temp1*temp1*
          temp1
temp3 = 87.74-0.40008*temp_k+9.398e-4*temp_k*temp_k+1.401e-6*
          temp_k*temp_k*temp_k
dielectric_constant temp2*temp3
=
```

#### CO2 concentration in the surface layer [mol/kg]

```
co2 = pco2*k0_co2
```

#### parameter A for the Davies formula [mol<sup>0.5</sup> l<sup>-0.5</sup>]

```
davies_parameter_a 1.82e6*power(dielectric_constant*temp_k,-1.5)
=
```

#### concentration of HCO<sub>3</sub><sup>-</sup> ions

```
hco3minus = co2*k1_co2/h3o
```

#### activity to concentration ratio of ions with a charge of +2/-2 [1]

```
power(10.0,0.0-davies_parameter_a*2*(sqrt(ionic_strength)
activity_coefficient/(1+sqrt(ionic_strength))-0.3*ionic_strength))
=
```

#### concentration of CO<sub>3</sub><sup>--</sup> ions

```
co32minus = hco3minus*k2_co2/h3o
```

#### activity of CO<sub>3</sub><sup>--</sup> ions (concentration corrected by ionic strength) [mol/kg]

```
activity_co32minus co32minus*activity_coefficient_2
=
```

#### relative saturation of rhodochrosite [1]

```
t_mn2*activity_coefficient_2*
saturation_rhodochroactivity_co32minus/power(10.0,-9.5)
=
```

### Constants

#### transformation rate from amorphous to crystalline iron hydroxide [1/d]

```
r_ihs_trans_ihc = 0.00164
```

### Process limitation factors

```
lim_t_dic_13 = theta(t_dic-0.0)
```

```
lim_t_ihs_53 = theta(t_ihs-0.0)
```

continued on next page...



## Process limitation factors, continued from previous page

```
lim_t_ca2_56 =      theta(t_ca2-0.0)
```

```
lim_t_mn2_62 =      theta(t_mn2-0.0)
```

### 3.4 Process type BGC/benthic/reoxidation

| Processes                                                                                                                                                                                                                                                                                                                |
|--------------------------------------------------------------------------------------------------------------------------------------------------------------------------------------------------------------------------------------------------------------------------------------------------------------------------|
| <b>nitrification in the sediment [mol/kg/day]</b><br>$t_{nh4} + 2*t_{o2} + h2o \rightarrow t_{no3} + 2*h3oplus$<br>$p_{nh4\_nit\_no3\_sed} = (t_{nh4}*t_{o2}*k_{nh4\_o2}*exp(q10\_nit*cgt\_temp))*cgt\_in\_sediment*lim\_t\_o2\_1*lim\_t\_nh4\_16$                                                                       |
| <b>oxidation of hydrogen sulfide with oxygen [mol/kg/day]</b><br>$t_{h2s} + 0.5*t_{o2} \rightarrow t_{sul} + h2o$<br>$p_{h2s\_oxo2\_sul} = (t_{h2s}*t_{o2}*k_{h2s\_o2}*exp(q10\_h2s*cgt\_temp))*lim\_t\_h2s\_29*lim\_t\_o2\_12$                                                                                          |
| <b>oxidation of hydrogen sulfide with nitrate [mol/kg/day]</b><br>$0.4*h3oplus + 0.4*t_{no3} + t_{h2s} \rightarrow 0.2*t_{n2} + 1.6*h2o + t_{sul}$<br>$p_{h2s\_oxno3\_sul} = (t_{h2s}*t_{no3}*k_{h2s\_no3}*exp(q10\_h2s*cgt\_temp))*lim\_t\_no3\_14*lim\_t\_h2s\_29$                                                     |
| <b>oxidation of elemental sulfur with oxygen [mol/kg/day]</b><br>$3*h2o + 1.5*t_{o2} + t_{sul} \rightarrow 2*h3oplus + t_{so4}$<br>$p_{sul\_oxo2\_so4} = (t_{sul}*t_{o2}*k_{sul\_o2}*exp(q10\_h2s*cgt\_temp))*lim\_t\_o2\_12*lim\_t\_sul\_30$                                                                            |
| <b>oxidation of elemental sulfur with nitrate [mol/kg/day]</b><br>$1.2*h2o + 1.2*t_{no3} + t_{sul} \rightarrow 0.6*t_{n2} + 0.8*h3oplus + t_{so4}$<br>$p_{sul\_oxno3\_so4} = (t_{sul}*t_{no3}*k_{sul\_no3}*exp(q10\_h2s*cgt\_temp))*lim\_t\_no3\_14*lim\_t\_sul\_30$                                                     |
| <b>oxidation of Fe<sup>2+</sup> to iron hydroxide in the sediment (sediment only) [mol/m<sup>2</sup>/day]</b><br>$t_{fe2} + 4.5*h2o + 0.25*t_{o2} \rightarrow 2*h3oplus + t_{ihs}$<br>$p_{fe2\_ox\_ihs} = (k_{feo2}*t_{fe2}*t_{o2}*oh*oh*cgt\_in\_sediment*cgt\_cellheight*cgt\_density)*lim\_t\_fe2\_55*lim\_t\_o2\_12$ |
| <b>reduction of sedimentary iron hydroxide to iron-II (sediment only) [mol/m<sup>2</sup>/day]</b><br>$t_{h2s} + 8.0*t_{ihs} \rightarrow 8.0*t_{iim} + 2*h2o + t_{so4} + 2.0*h3oplus$<br>$p_{ihs\_red\_iim} = (k_{h2s\_ihs}*t_{h2s}*ihs\_conc\_pw*fe2\_iim\_is\_smallest)*lim\_t\_ihs\_4*lim\_t\_h2s\_29$                 |
| <b>reduction of sedimentary iron hydroxide to iron-II (sediment only) [mol/m<sup>2</sup>/day]</b><br>$9.0*t_{h2s} + 8.0*t_{ihs} \rightarrow 8.0*t_{ims} + 18*h2o + t_{so4} + 2.0*h3oplus$<br>$p_{ihs\_red\_ims} = (k_{h2s\_ihs}*t_{h2s}*ihs\_conc\_pw*fe2\_ims\_is\_smallest)*lim\_t\_ihs\_4*lim\_t\_h2s\_29$            |
| <b>oxidation of Mn<sup>2+</sup> to manganese oxide in the sediment (sediment only) [mol/m<sup>2</sup>/day]</b>                                                                                                                                                                                                           |
| continued on next page...                                                                                                                                                                                                                                                                                                |

## Processes, continued from previous page

$$t_{mn2} + 0.5*t_{o2} + 3*h2o \rightarrow 2*h3oplus + t_{mos}$$

$$p_{mn2\_ox\_mos} = (k_{mno2}*t_{mn2}*t_{o2}*cgt\_in\_sediment*cgt\_cellheight*cgt\_density)*lim\_t_{mn2\_62}*lim\_t_{o2\_12}$$

oxidation of pyrite by manganese oxide to iron oxyhydroxide (sediment only)  
[mol/m<sup>2</sup>/day]

$$t_{mos} + t_{pyr} + 1.25*h3oplus + 1.25*h2o \rightarrow 0.375*t_{so4} + 1.625*t_{h2s} + t_{ihs} + t_{mn2}$$

$$p_{pyr\_oxmos\_ihs} = (cgt\_in\_sediment*max(r_{max\_lib\_mn2\_pyrox}/cgt\_cellheight/cgt\_density, r_{max\_ox\_pyr}*t_{pyr}))*lim\_t_{mos\_59}*lim\_t_{pyr\_58}$$

oxidation of pyrite by manganese oxide to iron oxyhydroxide (sediment only)  
[mol/m<sup>2</sup>/day]

$$0.25*t_{o2} + t_{pyr} + 4*h2o \rightarrow 1.75*t_{h2s} + 0.25*t_{so4} + 0.5*h3oplus + t_{ihs}$$

$$p_{pyr\_oxo2\_ihs} = (cgt\_in\_sediment*t_{o2}*pyr\_conc\_pw*k_{o2\_pyr}*cgt\_cellheight*cgt\_density)*lim\_t_{o2\_12}*lim\_t_{pyr\_58}$$

oxidation of minnesotaite by oxygen to iron oxyhydroxide (sediment only)  
[mol/m<sup>2</sup>/day]

$$0.25*t_{o2} + t_{iim} + 0.5*h2o \rightarrow t_{ihs}$$

$$p_{imm\_oxo2\_ihs} = (cgt\_in\_sediment*t_{o2}*iim\_conc\_pw*k_{o2\_pyr}*cgt\_cellheight*cgt\_density)*lim\_t_{o2\_12}*lim\_t_{iim\_61}$$

oxidation of iron-II in illite-montmorillonite mixed layer minerals to iron-III (sediment only) [mol/m<sup>2</sup>/day]

$$0.5*h2o + 0.25*t_{o2} + i2i \rightarrow t_{i3i}$$

$$p_{i2i\_oxo2\_i3i} = (cgt\_in\_sediment*max(i3i\_max-t_{i3i}, 0.0)*r_{i2i\_ox})*lim\_t_{o2\_2}$$

reduction of iron-III in clay minerals to iron-II consuming h2s (sediment only)  
[mol/m<sup>2</sup>/day]

$$8*t_{i3i} + t_{h2s} \rightarrow t_{so4} + 2*h3oplus + 2*h2o + 8*i2i$$

$$p_{i3i\_redh2s\_i2i} = (r_{h2s\_ox\_i3i}*t_{h2s})*lim\_t_{i3i\_6}*lim\_t_{h2s\_29}$$

reduction of sedimentary iron hydroxide to iron-II (sediment only) [mol/m<sup>2</sup>/day]

$$t_{h2s} + 8.0*t_{ihc} \rightarrow 8.0*t_{iim} + 2*h2o + t_{so4} + 2.0*h3oplus$$

$$p_{ihc\_red\_iim} = (k_{h2s\_ihs}*t_{h2s}*ihc\_conc\_pw*fe2\_iim\_is\_smallest)*lim\_t_{ihc\_10}*lim\_t_{h2s\_29}$$

reduction of sedimentary iron hydroxide to iron-II (sediment only) [mol/m<sup>2</sup>/day]

$$9.0*t_{h2s} + 8.0*t_{ihc} \rightarrow 8.0*t_{ims} + 18*h2o + t_{so4} + 2.0*h3oplus$$

$$p_{ihc\_red\_ims} = (k_{h2s\_ihs}*t_{h2s}*ihc\_conc\_pw*fe2\_ims\_is\_smallest)*lim\_t_{ihc\_10}*lim\_t_{h2s\_29}$$

continued on next page...

## Processes, continued from previous page

**oxidation of Fe<sup>2+</sup> by reduction of MnO<sub>2</sub> (sediment only) [mol/m<sup>2</sup>/day]**

```
t_mos + 2.0*t_fe2 + 6.0*h2o -> 2.0*h3oplus + t_mn2 + 2.0*t_ihs
p_fe2_mnox_ihs = (t_fe2*mos_conc_pw*k_mno2_fe2*cgt_cellheight*cgt_density)*
lim_t_mos_59*lim_t_fe2_55
```

**oxidation of h<sub>2</sub>s by reduction of MnO<sub>2</sub> (sediment only) [mol/m<sup>2</sup>/day]**

```
0.25*t_h2s + 1.5*h3oplus + t_mos -> t_mn2 + 2.5*h2o + 0.25*t_so4
p_h2s_mnox_so4 = (t_h2s*mos_conc_pw*k_mno2_h2s*cgt_cellheight*cgt_density)*
lim_t_h2s_29*lim_t_mos_59
```

**iron monosulfide oxidation to iron oxihydroxides (sediment only) [mol/m<sup>2</sup>/day]**

```
t_ims + 2.25*t_o2 + 4.5*h2o -> t_so4 + t_ihs + 2*h3oplus
p_ims_oxo2_ihs = (k_ims_o2*ims_conc_pw*t_o2*cgt_cellheight*cgt_density)*
lim_t_ims_57*lim_t_o2_12
```

**Auxiliary variables****absolute temperature [K]**

```
temp_k = cgt_temp + 273.15
```

**temporary value assumed for pH [1]**

```
ph_temp = 0.0-log(min(max(h3o,1.0e-12),1.0e-2))/log(10.0)
calculated iteratively, 10 iterations, initial value = 0.0
```

**self-ionization constant of Water [mol<sup>2</sup>/kg<sup>2</sup>]**

```
k_water = exp( -13847.26 / temp_k + 148.96502 - 23.6521 * log(temp_k)
+ (118.67/temp_k - 5.977 + 1.0495 * log(temp_k)) *
sqrt(cgt_sali) - 0.01615 * cgt_sali)
```

**Acid dissociation constant CO<sub>2</sub> + 2 H<sub>2</sub>O <-> HCO<sub>3</sub><sup>-</sup> + H<sub>3</sub>O<sup>+</sup> [mol/kg]**

```
k1_co2 = power(10.0,( -3633.86 / temp_k + 61.2172 - 9.6777 *
log(temp_k) + 0.011555 * cgt_sali - 0.0001152 * cgt_sali *
cgt_sali))
```

**Acid dissociation constant HCO<sub>3</sub><sup>-</sup> + H<sub>2</sub>O <-> [CO<sub>3</sub><sup>2-</sup>] + H<sub>3</sub>O<sup>+</sup> [mol/kg]**

```
k2_co2 = power(10.0,( -471.78 / temp_k - 25.929 + 3.16967 *
log(temp_k)+ 0.01781 * cgt_sali - 0.0001122 * cgt_sali *
cgt_sali))
```

**Acid dissociation constant of boric acid [mol/kg]**

```
k_boron = exp(( -8966.9 - 2890.53*sqrt(cgt_sali) - 77.942*cgt_sali +
1.728*cgt_sali*sqrt(cgt_sali) - 0.0996*cgt_sali*cgt_sali) /
temp_k + 148.0248 + 137.1942*sqrt(cgt_sali) + 1.62142*
cgt_sali + (-24.4344 - 25.085*sqrt(cgt_sali) - 0.2474*
cgt_sali)*log(temp_k) + 0.053105*sqrt(cgt_sali)*temp_k )
```

continued on next page...

## Auxiliary variables, continued from previous page

**Acid dissociation constant  $\text{H}_3\text{PO}_4 + \text{H}_2\text{O} \rightleftharpoons [\text{H}_2\text{PO}_4^-] + \text{H}_3\text{O}^+$  [mol/kg]**

$$k1\_po4 = \exp(-4576.752/\text{temp\_k} + 115.525 - 18.453 \cdot \log(\text{temp\_k}) + (0.69171 - 106.736/\text{temp\_k}) \cdot \sqrt{\text{cgt\_sali}} - (0.01844 + 0.65643/\text{temp\_k}) \cdot \text{cgt\_sali})$$

**Acid dissociation constant  $[\text{H}_2\text{PO}_4^-] + \text{H}_2\text{O} \rightleftharpoons [\text{HPO}_4^{2-}] + \text{H}_3\text{O}^+$  [mol/kg]**

$$k2\_po4 = \exp(-8814.715/\text{temp\_k} + 172.0883 - 27.927 \cdot \log(\text{temp\_k}) + (1.35660 - 160.340/\text{temp\_k}) \cdot \sqrt{\text{cgt\_sali}} - (0.05778 - 0.37335/\text{temp\_k}) \cdot \text{cgt\_sali})$$

**Acid dissociation constant  $[\text{HPO}_4^{2-}] + \text{H}_2\text{O} \rightleftharpoons [\text{PO}_4^{3-}] + \text{H}_3\text{O}^+$  [mol/kg]**

$$k3\_po4 = \exp(-3070.75/\text{temp\_k} - 18.141 + (2.81197 + 17.27039/\text{temp\_k}) \cdot \sqrt{\text{cgt\_sali}} - (0.09984 + 44.99486/\text{temp\_k}) \cdot \text{cgt\_sali})$$

**Acid dissociation constant  $\text{H}_2\text{S} + \text{H}_2\text{O} \rightleftharpoons \text{HS}^- + \text{H}_3\text{O}^+$  [mol/kg]**

$$k1\_h2s = \exp(-3131.42/\text{temp\_k} - 5.818 + 0.368 \cdot (\text{power}(\max(0.0, \text{cgt\_sali}), (1.0/3.0))))$$

**total concentration of boron [mol/kg]**

$$\text{boron\_total} = 0.000416 \cdot \text{cgt\_sali}/35.0$$

**boron alkalinity [mol/kg]**

$$\text{alk\_boron} = \text{boron\_total} \cdot k\_boron / (k\_boron + h3o)$$

calculated iteratively, 10 iterations, initial value = 0.0

**hydrogen sulfide alkalinity [mol/kg]**

$$\text{alk\_h2s} = t\_h2s \cdot k1\_h2s / (k1\_h2s + h3o)$$

calculated iteratively, 10 iterations, initial value = 0.0

**water alkalinity [mol/kg]**

$$\text{alk\_water} = k\_water / h3o - h3o$$

calculated iteratively, 10 iterations, initial value = 0.0

**denominator in phosphate alkalinity formula [mol<sup>3</sup>/kg<sup>3</sup>]**

$$\text{alk\_po4\_denominator} = (h3o \cdot h3o \cdot h3o + k1\_po4 \cdot h3o \cdot h3o + k1\_po4 \cdot k2\_po4 \cdot h3o + k1\_po4 \cdot k2\_po4 \cdot k3\_po4)$$

calculated iteratively, 10 iterations, initial value = 0.0

**phosphate alkalinity [mol/kg]**

$$\text{alk\_po4} = (t\_po4 \cdot (k1\_po4 \cdot k2\_po4 \cdot h3o + 2.0 \cdot k1\_po4 \cdot k2\_po4 \cdot k3\_po4 - h3o \cdot h3o \cdot h3o)) / \text{alk\_po4\_denominator}$$

calculated iteratively, 10 iterations, initial value = 0.0

continued on next page...

### Auxiliary variables, continued from previous page

#### denominator in carbonate alkalinity formula [mol<sup>2</sup>/kg<sup>2</sup>]

```
alk_co2_denominator (h3o*h3o + k1_co2*h3o + k1_co2*k2_co2)
=
calculated iteratively, 10 iterations, initial value = 0.0
```

#### carbonate alkalinity [mol/kg]

```
alk_co2 = t_dic*k1_co2*(h3o+2*k2_co2)/alk_co2_denominator
calculated iteratively, 10 iterations, initial value = 0.0
```

#### error in total alkalinity calculation at the assumed pH [mol/kg]

```
alk_residual = t_alk - alk_co2 - alk_po4 - alk_boron - alk_h2s - alk_water
calculated iteratively, 10 iterations, initial value = 0.0
```

#### derivative of phosphate alkalinity with respect to h3o [1]

```
dalkp_dh3o = t_po4*(0.0-k1_po4*h3o*h3o*h3o-h3o-4*k1_po4*k2_po4*h3o*h3o*
h3o-(k1_po4*k1_po4*k2_po4+9*k1_po4*k2_po4*k3_po4)*h3o*h3o-
4*k1_po4*k1_po4*k2_po4*k3_po4*h3o-k1_po4*k1_po4*k2_po4*
k2_po4*k3_po4)/(alk_po4_denominator*alk_po4_denominator)
calculated iteratively, 10 iterations, initial value = 0.0
```

#### derivative of carbonate alkalinity with respect to h3o [1]

```
dalkc_dh3o = t_dic*(0.0-k1_co2*h3o*h3o-k1_co2*k1_co2*k2_co2-4*k1_co2*
k2_co2*h3o)/(alk_co2_denominator*alk_co2_denominator)
calculated iteratively, 10 iterations, initial value = 0.0
```

#### derivative of residual\_alk with respect to pH [mol/kg]

```
dalkresidual_dpH = 0.0-log(10.0)*h3o*(alk_boron/(k_boron+h3o)+alk_h2s/(k1_h2s+
h3o)+k_water/(h3o*h3o)+1-dalkp_dh3o-dalkc_dh3o)
calculated iteratively, 10 iterations, initial value = 0.0
```

#### newly determined pH value [1]

```
temp1 = alk_residual/dalkresidual_dpH
ph = ph_temp - temp1 + theta(abs(temp1) - 1)*0.5*temp1
calculated iteratively, 10 iterations, initial value = 0.0
```

#### h3o ion concentration [mol/kg]

```
h3o = power(10.0,0.0-max(1.0,min(13.0,ph)))
calculated iteratively, 10 iterations, initial value = 1.0e-8
```

#### h3o ion concentration [mol/kg]

```
oh = power(10.0,log(k_water)/log(10.0)+max(1.0,min(13.0,ph)))
```

#### Acid dissociation constant H<sub>2</sub>S + H<sub>2</sub>O <-> HS<sup>-</sup> + H<sub>3</sub>O<sup>+</sup> [mol/kg]

```
k1_h2s_sed = exp( -3131.42/temp_k - 5.818 + 0.368*
(power(max(0.0,cgt_sali),(1.0/3.0))))
```

continued on next page...

## Auxiliary variables, continued from previous page

**iron hydroxide half-saturation constant converted to [mol/m<sup>2</sup>]**

```

            ihs_min_sed_irred*cgt_cellheight*cgt_density
ihs_min_sed_irred_2d
=

```

**ionic strength of the solution [mol/kg]**

```

ionic_strength = 0.02*cgt_sali

```

**dielectric constant of seawater [F/m]**

```

temp1 = cgt_sali*(1.707e-2+1.205e-5*cgt_sali+4.058e-9*
            power(cgt_sali,2.0))
temp2 = 1.0-0.2551*temp1+5.151e-2*temp1*temp1-6.889e-3*temp1*temp1*
            temp1
temp3 = 87.74-0.40008*temp_k+9.398e-4*temp_k*temp_k+1.401e-6*
            temp_k*temp_k*temp_k
dielectric_constant temp2*temp3
=

```

**concentration of HS- ions [mol/kg]**

```

hsminus = t_h2s * k1_h2s_sed / (k1_h2s_sed + h3o)

```

**rate constant iron-II oxidation by o<sub>2</sub> [kg<sup>3</sup>/mol<sup>3</sup>/d]**

```

k_feo2 = power(10.0,21.56-1545.0/temp_k-3.29*
            power(ionic_strength,0.5)+1.52*ionic_strength)

```

**parameter A for the Davies formula [mol<sup>0.5</sup> l<sup>-0.5</sup>]**

```

davies_parameter_a 1.82e6*power(dielectric_constant*temp_k,-1.5)
=

```

**activity to concentration ratio of ions with a charge of +1/-1 [1]**

```

            power(10.0,0.0-davies_parameter_a*1*(sqrt(ionic_strength)
activity_coefficient/(1+sqrt(ionic_strength))-0.3*ionic_strength))
=

```

**activity to concentration ratio of ions with a charge of +2/-2 [1]**

```

            power(10.0,0.0-davies_parameter_a*2*(sqrt(ionic_strength)
activity_coefficient/(1+sqrt(ionic_strength))-0.3*ionic_strength))
=

```

**activity of H<sub>3</sub>O<sup>+</sup> ions (concentration corrected by ionic strength) [mol/kg]**

```

activity_h3oplus = h3o*activity_coefficient_1

```

**amount of structural iron in illite-montmorillonite mixed-layer minerals that can be oxidized or reduced [mol/m<sup>2</sup>]**

```

temp1 = 2.7 * max(vol_fraction_im*(1.0-POR),epsilon)

```

continued on next page...

| Auxiliary variables, continued from previous page                                                                                              |                                                                                                                      |
|------------------------------------------------------------------------------------------------------------------------------------------------|----------------------------------------------------------------------------------------------------------------------|
| temp2 =                                                                                                                                        | temp1*fe_content_im                                                                                                  |
| temp3 =                                                                                                                                        | temp2/55.0                                                                                                           |
| i3i_max =                                                                                                                                      | temp3 * 1000 * cgt_cellheight*cgt_density                                                                            |
| <b>Fe-II concentration in equilibrium with iron monosulfide precipitation [mol/kg]</b>                                                         |                                                                                                                      |
| fe2_eq_ims =                                                                                                                                   | power(10.0,-2.95)*activity_h3oplus/max(hsminus*<br>activity_coefficient_1,1.0e-3*epsilon)<br>/activity_coefficient_2 |
| <b>Fe-II concentration in equilibrium with iron adsorbed to illite-montmorillonite mixed layer minerals [mol/kg]</b>                           |                                                                                                                      |
| temp1 =                                                                                                                                        | 2.7 * max(vol_fraction_im*(1.0-POR),epsilon)                                                                         |
| fe2_eq_iim =                                                                                                                                   | (max(t_iim,epsilon)/cgt_cellheight/cgt_density)/(100*temp1)<br>+1000*(1.0-cgt_in_sediment)                           |
| <b>siderite is the favoured species for precipitation (0 or 1) [1]</b>                                                                         |                                                                                                                      |
| fe2_ims_is_smallest                                                                                                                            | theta(fe2_eq_iim-fe2_eq_ims)                                                                                         |
| =                                                                                                                                              |                                                                                                                      |
| <b>minnesotaite is the favoured species for precipitation (0 or 1) [1]</b>                                                                     |                                                                                                                      |
| fe2_iim_is_smallest                                                                                                                            | theta(fe2_eq_ims-fe2_eq_iim)                                                                                         |
| =                                                                                                                                              |                                                                                                                      |
| <b>pyrite concentration if all was dissolved in the pore water [mol/kg]</b>                                                                    |                                                                                                                      |
| pyr_conc_pw =                                                                                                                                  | t_pyr/cgt_cellheight/cgt_density/max(POR,epsilon)                                                                    |
| <b>potential iron-II adsorbed to illite-montmorillonite mixed-layer minerals concentration if all was dissolved in the pore water [mol/kg]</b> |                                                                                                                      |
| iim_conc_pw =                                                                                                                                  | t_iim/cgt_cellheight/cgt_density/max(POR,epsilon)                                                                    |
| <b>potential amorphous iron hydroxide concentration if all was dissolved in the pore water [mol/kg]</b>                                        |                                                                                                                      |
| ihs_conc_pw =                                                                                                                                  | t_ihs/cgt_cellheight/cgt_density/max(POR,epsilon)                                                                    |
| <b>potential crystalline iron hydroxide concentration if all was dissolved in the pore water [mol/kg]</b>                                      |                                                                                                                      |
| ihc_conc_pw =                                                                                                                                  | t_ihc/cgt_cellheight/cgt_density/max(POR,epsilon)                                                                    |
| <b>potential manganese oxide concentration if all was dissolved in the pore water [mol/kg]</b>                                                 |                                                                                                                      |
| mos_conc_pw =                                                                                                                                  | t_mos/cgt_cellheight/cgt_density/max(POR,epsilon)                                                                    |
| <b>potential iron monosulfide concentration if all was dissolved in the pore water [mol/kg]</b>                                                |                                                                                                                      |
| continued on next page...                                                                                                                      |                                                                                                                      |



| Auxiliary variables, continued from previous page                                                     |                                                   |
|-------------------------------------------------------------------------------------------------------|---------------------------------------------------|
| ims_conc_pw =                                                                                         | t_ims/cgt_cellheight/cgt_density/max(POR,epsilon) |
| Constants                                                                                             |                                                   |
| no division by 0                                                                                      |                                                   |
| epsilon =                                                                                             | 4.5E-17                                           |
| iron hydroxide half-saturation concentration for detritus remineralization by iron reduction [mol/kg] |                                                   |
| ihs_min_sed_irred =                                                                                   | 0.0065                                            |
| reaction constant h2s oxidation with no3 [kg/mol/day]                                                 |                                                   |
| k_h2s_no3 =                                                                                           | 438.0                                             |
| reaction constant h2s oxidation with o2 [kg/mol/day]                                                  |                                                   |
| k_h2s_o2 =                                                                                            | 438.0                                             |
| reaction constant sul oxidation with no3 [kg/mol/day]                                                 |                                                   |
| k_sul_no3 =                                                                                           | 20000.0                                           |
| reaction constant sul oxidation with o2 [kg/mol/day]                                                  |                                                   |
| k_sul_o2 =                                                                                            | 20000.0                                           |
| oxygen half-saturation constant for nitrification [mol/kg]                                            |                                                   |
| o2_min_nit =                                                                                          | 1.0E-6                                            |
| oxygen half-saturation constant for recycling of sediment detritus using oxygen [mol/kg]              |                                                   |
| o2_min_sed_resp =                                                                                     | 2.0E-5                                            |
| q10 rule factor for oxidation of h2s and sul [1/K]                                                    |                                                   |
| q10_h2s =                                                                                             | 0.0693                                            |
| q10 rule factor for nitrification [1/K]                                                               |                                                   |
| q10_nit =                                                                                             | 0.11                                              |
| nitrification rate for ammonium in the sediment at 0°C [1/d]                                          |                                                   |
| k_nh4_o2 =                                                                                            | 274000.0                                          |
| porosity                                                                                              |                                                   |
| por =                                                                                                 | 0.77                                              |
| rate constant for hydrogen sulfide oxidation in presence of iron-III minerals [1/d]                   |                                                   |
| k_h2s_ihs =                                                                                           | 21.9                                              |
| continued on next page...                                                                             |                                                   |

| Constants, continued from previous page                                                        |                                |
|------------------------------------------------------------------------------------------------|--------------------------------|
| <b>oxidation constant for manganese-II [kg<sup>3</sup>/mol<sup>3</sup>/d]</b>                  |                                |
| k_mno2 =                                                                                       | 548000.0                       |
| <b>fraction of illite-montmorillonite mixed layer minerals on volume of all minerals [1]</b>   |                                |
| vol_fraction_im =                                                                              | 0.5                            |
| <b>potentially reducible iron content of illite-montmorillonite mixed layer minerals [g/g]</b> |                                |
| fe_content_im =                                                                                | 0.001                          |
| <b>maximum rate of mn2 liberation due to pyrite reduction [mol/kg/d]</b>                       |                                |
| r_max_lib_mn2_pyrox                                                                            | 1.0E-5                         |
| <b>maximum oxidation rate of pyrite [1/d]</b>                                                  |                                |
| r_max_ox_pyr =                                                                                 | 0.1                            |
| <b>rate coefficient for oxygen consumption by pyrite oxidation [kg/mol/d]</b>                  |                                |
| k_o2_pyr =                                                                                     | 2.73                           |
| <b>rate of oxidation of iron-II in illite-montmorillonite mixed-layer minerals [1/d]</b>       |                                |
| r_i2i_ox =                                                                                     | 0.1                            |
| <b>rate of h2s reduction by i3i oxidation [1/d]</b>                                            |                                |
| r_h2s_ox_i3i =                                                                                 | 0.1                            |
| <b>rate constant for MnO2 reduction by Fe2+ [kg/mol/d]</b>                                     |                                |
| k_mno2_fe2 =                                                                                   | 5.48                           |
| <b>rate constant for ims oxidation by O2 [kg/mol/d]</b>                                        |                                |
| k_ims_o2 =                                                                                     | 822.0                          |
| <b>rate constant for manganese oxide reduction by h2s [kg/mol/d]</b>                           |                                |
| k_mno2_h2s =                                                                                   | 58.4                           |
| Process limitation factors                                                                     |                                |
| lim_t_o2_1 =                                                                                   | t_o2/(t_o2+o2_min_nit)         |
| lim_t_o2_2 =                                                                                   | 1.0-exp(-t_o2/o2_min_sed_resp) |
| lim_t_o2_12 =                                                                                  | theta(t_o2-0.0)                |
| lim_t_nh4_16 =                                                                                 | theta(t_nh4-0.0)               |
| lim_t_no3_14 =                                                                                 | theta(t_no3-0.0)               |
| continued on next page...                                                                      |                                |

| Process limitation factors, continued from previous page |                                      |
|----------------------------------------------------------|--------------------------------------|
| lim_t_h2s_29 =                                           | theta(t_h2s-0.0)                     |
| lim_t_sul_30 =                                           | theta(t_sul-0.0)                     |
| lim_t_ihs_4 =                                            | 1.0-exp(-t_ihs/ihs_min_sed_irred_2d) |
| lim_t_fe2_55 =                                           | theta(t_fe2-0.0)                     |
| lim_t_pyr_58 =                                           | theta(t_pyr-0.0)                     |
| lim_t_ims_57 =                                           | theta(t_ims-0.0)                     |
| lim_t_mos_59 =                                           | theta(t_mos-0.0)                     |
| lim_t_mn2_62 =                                           | theta(t_mn2-0.0)                     |
| lim_t_iim_61 =                                           | theta(t_iim-0.0)                     |
| lim_t_i3i_6 =                                            | 1.0-exp(-t_i3i/ihs_min_sed_irred_2d) |
| lim_t_ihc_10 =                                           | 1.0-exp(-t_ihc/ihs_min_sed_irred_2d) |

### 3.5 Process type BGC/pelagic/mineralization

| Processes                                                                                                                                                                                                                                                                                                                                                                                                                                                                                                                                                                                                                                                                                   |
|---------------------------------------------------------------------------------------------------------------------------------------------------------------------------------------------------------------------------------------------------------------------------------------------------------------------------------------------------------------------------------------------------------------------------------------------------------------------------------------------------------------------------------------------------------------------------------------------------------------------------------------------------------------------------------------------|
| <b>mineralization of DON [mol/kg/day]</b><br>$t_{don} \rightarrow t_{nh4}$<br>$p_{don\_rec\_nh4} = (t_{don} * r_{don\_rec}) * lim\_t_{don\_21}$                                                                                                                                                                                                                                                                                                                                                                                                                                                                                                                                             |
| <b>recycling of detritus to ammonium using oxygen (respiration) (index 1 to 6) [mol/kg/day]</b><br>$h3oplus + rfr\_pc\_enrichment\_det * 6.625 * t_{o2} + t_{det\_1} \rightarrow (1.0 + 6.625 * rfr\_pc\_enrichment\_det) * h2o + rfr\_pc\_enrichment\_det * rfr\_c * t_{dic} + t_{nh4} + 0 * h3oplus + 0 * h2o$<br>$p_{det\_1\_resp\_nh4} = (t_{det\_1} * r_{det\_1\_rec} * exp(q10\_det\_rec * cgt\_temp) * (1.0 - cgt\_in\_sediment)) * lim\_t_{o2\_8} * lim\_t_{det\_1\_31}$                                                                                                                                                                                                            |
| <b>recycling of detritus to ammonium using nitrate (denitrification) (index 1 to 6) [mol/kg/day]</b><br>$rfr\_pc\_enrichment\_det * 5.3 * t_{no3} + (1.0 + 5.3 * rfr\_pc\_enrichment\_det) * h3oplus + t_{det\_1} \rightarrow (1.0 + 14.575 * rfr\_pc\_enrichment\_det) * h2o + rfr\_pc\_enrichment\_det * 2.65 * t_{n2} + t_{nh4} + rfr\_pc\_enrichment\_det * rfr\_c * t_{dic}$<br>$p_{det\_1\_denit\_nh4} = (t_{det\_1} * r_{det\_1\_rec} * exp(q10\_det\_rec * cgt\_temp) * (1.0 - cgt\_in\_sediment)) * (1.0 - lim\_t_{o2\_8}) * lim\_t_{no3\_9} * lim\_t_{det\_1\_31}$                                                                                                                |
| <b>recycling of sedimentary detritus to ammonium using sulfate (sulfate reduction) (index 1 to 6) [mol/kg/day]</b><br>$(1.0 + rfr\_pc\_enrichment\_det * 6.625) * h3oplus + rfr\_pc\_enrichment\_det * 3.3125 * t_{so4} + t_{det\_1} \rightarrow (1.0 + rfr\_pc\_enrichment\_det * 13.25) * h2o + rfr\_pc\_enrichment\_det * 3.3125 * t_{h2s} + rfr\_pc\_enrichment\_det * rfr\_c * t_{dic} + t_{nh4}$<br>$p_{det\_1\_sulf\_nh4} = (t_{det\_1} * r_{det\_1\_rec} * exp(q10\_det\_rec * cgt\_temp) * max(t_{so4}, 0.0) / (max(t_{so4}, 0.0) + so4\_min\_det\_sulf) * (1.0 - cgt\_in\_sediment)) * (1.0 - lim\_t_{o2\_8}) * (1.0 - lim\_t_{no3\_9}) * lim\_t_{so4\_28} * lim\_t_{det\_1\_31}$ |
| <b>recycling of detritus to ammonium using oxygen (respiration) (index 1 to 6) [mol/kg/day]</b><br>$t_{detp\_1} + 3 * rfr\_pc\_enrichment\_det * rfr\_p * h2o \rightarrow 3 * rfr\_pc\_enrichment\_det * rfr\_p * h3oplus + rfr\_pc\_enrichment\_det * rfr\_p * t_{po4}$<br>$p_{detp\_1\_remin\_po4} = (t_{detp\_1} * r_{det\_1\_rec} * exp(q10\_det\_rec * cgt\_temp) * (1.0 - cgt\_in\_sediment) * (1.0 + (factor\_pref\_remin\_p - 1.0) * o2\_min\_sed\_resp / (t_{o2} + o2\_min\_sed\_resp))) * lim\_t_{detp\_1\_37}$                                                                                                                                                                   |
| <b>respiration of POC [mol/kg/day]</b><br>$t_{o2} + t_{poc} \rightarrow h2o + t_{dic}$<br>$p_{poc\_resp} = (t_{poc} * r_{poc\_rec} * exp(q10\_det\_rec * cgt\_temp)) * lim\_t_{o2\_8} * lim\_t_{poc\_68}$                                                                                                                                                                                                                                                                                                                                                                                                                                                                                   |
| continued on next page...                                                                                                                                                                                                                                                                                                                                                                                                                                                                                                                                                                                                                                                                   |

## Processes, continued from previous page

**recycling of POC using nitrate (denitrification) [mol/kg/day]**

$$0.8 \cdot h3oplus + 0.8 \cdot t_{no3} + t_{poc} \rightarrow 0.4 \cdot t_{n2} + 2.2 \cdot h2o + t_{dic}$$

$$p_{poc\_denit} = (t_{poc} \cdot r_{poc\_rec} \cdot \exp(q10\_det\_rec \cdot cgt\_temp)) \cdot (1.0 - \lim_{t\_o2\_8}) \cdot \lim_{t\_no3\_9} \cdot \lim_{t\_poc\_68}$$
**Mineralization of POC, e-acceptor sulfate (sulfate reduction) [mol/kg/day]**

$$h3oplus + 0.5 \cdot t_{so4} + t_{poc} \rightarrow 2 \cdot h2o + 0.5 \cdot t_{h2s} + t_{dic}$$

$$p_{poc\_sulf} = (t_{poc} \cdot r_{poc\_rec} \cdot \exp(q10\_det\_rec \cdot cgt\_temp)) \cdot (1.0 - \lim_{t\_o2\_8}) \cdot (1.0 - \lim_{t\_no3\_9}) \cdot \lim_{t\_so4\_28} \cdot \lim_{t\_poc\_68}$$
**Auxiliary variables****Constants****minimum no3 concentration for recycling of detritus using nitrate (denitrification)**

$$no3\_min\_det\_denit = 1.0E-9$$
**oxygen half-saturation constant for detritus recycling [mol/kg]**

$$o2\_min\_det\_resp = 1.0E-5$$
**oxygen half-saturation constant for recycling of sediment detritus using oxygen [mol/kg]**

$$o2\_min\_sed\_resp = 2.0E-5$$
**q10 rule factor for recycling [1/K]**

$$q10\_det\_rec = 0.15$$
**redfield ratio C/N**

$$rfr\_c = 6.625$$
**redfield ratio P/N**

$$rfr\_p = 0.0625$$
**enrichment factor for P and C in detritus [1]**

$$rfr\_pc\_enrichment\_de = 1.5$$
**rate constant mineralizing DON into NH4 [1/d]**

$$r\_don\_rec = 0.01$$
**minimum sulfate concentration for sulfate reduction [mol/kg]**

$$so4\_min\_det\_sulf = 1.0E-6$$
**detritus recycling rates [1/d]**

continued on next page...

| Constants, continued from previous page                                                             |                                   |
|-----------------------------------------------------------------------------------------------------|-----------------------------------|
| r_det_1_rec =                                                                                       | 0.0647                            |
| detritus recycling rates [1/d]                                                                      |                                   |
| r_det_2_rec =                                                                                       | 0.00924                           |
| detritus recycling rates [1/d]                                                                      |                                   |
| r_det_3_rec =                                                                                       | 0.00136                           |
| detritus recycling rates [1/d]                                                                      |                                   |
| r_det_4_rec =                                                                                       | 0.000108                          |
| detritus recycling rates [1/d]                                                                      |                                   |
| r_det_5_rec =                                                                                       | 1.62E-5                           |
| detritus recycling rates [1/d]                                                                      |                                   |
| r_det_6_rec =                                                                                       | 0.0                               |
| acceleration factor for preferential mineralization of P compared to N under hypoxic conditions [1] |                                   |
| factor_pref_remin_p                                                                                 | 10.0                              |
| =                                                                                                   |                                   |
| recycling rate of particulate organic carbon (TEP) at 0 degC [1/day]                                |                                   |
| r_poc_rec =                                                                                         | 0.003                             |
| Process limitation factors                                                                          |                                   |
| lim_t_don_21 =                                                                                      | theta(t_don-0.0)                  |
| lim_t_o2_8 =                                                                                        | 1.0-exp(-t_o2/o2_min_det_resp)    |
| lim_t_no3_9 =                                                                                       | 1.0-exp(-t_no3/no3_min_det_denit) |
| lim_t_so4_28 =                                                                                      | theta(t_so4-0.0)                  |
| lim_t_det_1_31 =                                                                                    | theta(t_det_1-0.0)                |
| lim_t_det_2_32 =                                                                                    | theta(t_det_2-0.0)                |
| lim_t_det_3_33 =                                                                                    | theta(t_det_3-0.0)                |
| lim_t_det_4_34 =                                                                                    | theta(t_det_4-0.0)                |
| lim_t_det_5_35 =                                                                                    | theta(t_det_5-0.0)                |
| lim_t_det_6_36 =                                                                                    | theta(t_det_6-0.0)                |
| continued on next page...                                                                           |                                   |

## Process limitation factors, continued from previous page

```
lim_t_detp_1_37 = theta(t_detp_1-0.0)
```

```
lim_t_detp_2_38 = theta(t_detp_2-0.0)
```

```
lim_t_detp_3_39 = theta(t_detp_3-0.0)
```

```
lim_t_detp_4_40 = theta(t_detp_4-0.0)
```

```
lim_t_detp_5_41 = theta(t_detp_5-0.0)
```

```
lim_t_detp_6_42 = theta(t_detp_6-0.0)
```

```
lim_t_poc_68 = theta(t_poc-0.0)
```

### 3.6 Process type BGC/pelagic/phytoplankton

| Processes                                                                                                                                                                                                                                                                                                                             |
|---------------------------------------------------------------------------------------------------------------------------------------------------------------------------------------------------------------------------------------------------------------------------------------------------------------------------------------|
| <b>assimilation of nitrate by large-cell phytoplankton [mol/kg/day]</b><br>$t_{no3} + rfr\_p*t_{po4} + rfr\_c*t_{dic} + 6.4375*h2o + 1.1875*h3oplus \rightarrow t_{lpp} + 8.625*t_{o2}$<br>$p_{no3\_assim\_lpp} = (lpp\_plus\_lpp0*lr\_assim\_lpp*t_{no3}/(din+epsilon))*lim\_t_{no3\_14}*lim\_t_{po4\_15}*lim\_t_{dic\_13}$          |
| <b>assimilation of ammonium by large-cell phytoplankton [mol/kg/day]</b><br>$7.4375*h2o + rfr\_c*t_{dic} + rfr\_p*t_{po4} + t_{nh4} \rightarrow 0.8125*h3oplus + 6.625*t_{o2} + t_{lpp}$<br>$p_{nh4\_assim\_lpp} = (lpp\_plus\_lpp0*lr\_assim\_lpp*t_{nh4}/(din+epsilon))*lim\_t_{dic\_13}*lim\_t_{po4\_15}*lim\_t_{nh4\_16}$         |
| <b>assimilation of nitrate by small-cell phytoplankton [mol/kg/day]</b><br>$t_{no3} + rfr\_p*t_{po4} + rfr\_c*t_{dic} + 6.4375*h2o + 1.1875*h3oplus \rightarrow t_{spp} + 8.625*t_{o2}$<br>$p_{no3\_assim\_spp} = (spp\_plus\_spp0*lr\_assim\_spp*t_{no3}/(din+epsilon))*lim\_t_{no3\_14}*lim\_t_{po4\_15}*lim\_t_{dic\_13}$          |
| <b>assimilation of ammonium by small-cell phytoplankton [mol/kg/day]</b><br>$t_{nh4} + rfr\_p*t_{po4} + rfr\_c*t_{dic} + 0*h2o + 7.4375*h2o \rightarrow t_{spp} + 6.625*t_{o2} + 0.8125*h3oplus$<br>$p_{nh4\_assim\_spp} = (spp\_plus\_spp0*lr\_assim\_spp*t_{nh4}/(din+epsilon))*lim\_t_{nh4\_16}*lim\_t_{po4\_15}*lim\_t_{dic\_13}$ |
| <b>fixation of dinitrogen by diazotroph cyanobacteria [mol/kg/day]</b><br>$0.1875*h3oplus + 0.5*t_{n2} + rfr\_p*t_{po4} + rfr\_c*t_{dic} + 7.9375*h2o \rightarrow t_{cya} + 7.375*t_{o2}$<br>$p_{n2\_assim\_cya} = (cya\_plus\_cya0*lr\_assim\_cya)*lim\_t_{n2\_11}*lim\_t_{po4\_15}*lim\_t_{dic\_13}$                                |
| <b>respiration of large-cell phytoplankton [mol/kg/day]</b><br>$t_{lpp} + 6.625*t_{o2} + 0.8125*h3oplus \rightarrow don\_fraction*t_{don} + (1-don\_fraction)*t_{nh4} + rfr\_p*t_{po4} + rfr\_c*t_{dic} + 7.4375*h2o$<br>$p_{lpp\_resp\_nh4} = (t_{lpp}*r_{lpp\_resp}*(1.0-cgt\_in\_sediment))*lim\_t_{lpp\_17}*lim\_t_{o2\_12}$      |
| <b>respiration of small-cell phytoplankton [mol/kg/day]</b><br>$0.8125*h3oplus + 6.625*t_{o2} + t_{spp} \rightarrow 7.4375*h2o + rfr\_c*t_{dic} + rfr\_p*t_{po4} + (1-don\_fraction)*t_{nh4} + don\_fraction*t_{don}$<br>$p_{spp\_resp\_nh4} = (t_{spp}*r_{spp\_resp}*(1.0-cgt\_in\_sediment))*lim\_t_{o2\_12}*lim\_t_{spp\_18}$      |
| continued on next page...                                                                                                                                                                                                                                                                                                             |



## Processes, continued from previous page

**respiration of diazotroph cyanobacteria [mol/kg/day]**

```
0.8125*h3oplus + 6.625*t_o2 + t_cya -> 7.4375*h2o + rfr_c*t_dic + rfr_p*t_po4 +
don_fraction*t_don + (1-don_fraction)*t_nh4
p_cya_resp_nh4 = (t_cya*r_cya_resp*(1.0-cgt_in_sediment))*lim_t_o2_12*
lim_t_cya_19
```

**mortality of large-cell phytoplankton (index 1 to 6) [mol/kg/day]**

```
(1.0-(1.0/rfr_pc_enrichment_det))*h3oplus + t_lpp -> (1.0-
(1.0/rfr_pc_enrichment_det))*h2o + (1.0-(1.0/rfr_pc_enrichment_det))*t_nh4 +
(1.0/rfr_pc_enrichment_det)*t_det_1 + (1.0/rfr_pc_enrichment_det)*t_detp_1
p_lpp_mort_det_1 = (frac_det_1*t_lpp*r_pp_mort*(1+9*theta(5.0e-6-t_o2)))*
lim_t_lpp_17
```

**mortality of small-scale phytoplankton (index 1 to 6) [mol/kg/day]**

```
(1.0-(1.0/rfr_pc_enrichment_det))*h3oplus + t_spp -> (1.0-
(1.0/rfr_pc_enrichment_det))*h2o + (1.0-(1.0/rfr_pc_enrichment_det))*t_nh4 +
(1.0/rfr_pc_enrichment_det)*t_det_1 + (1.0/rfr_pc_enrichment_det)*t_detp_1
p_spp_mort_det_1 = (frac_det_1*t_spp*r_pp_mort*(1+9*theta(5.0e-6-t_o2)))*
lim_t_spp_18
```

**mortality of diazotroph cyanobacteria (index 1 to 6) [mol/kg/day]**

```
t_cya + (1.0-(1.0/rfr_pc_enrichment_det))*h3oplus ->
(1.0/rfr_pc_enrichment_det)*t_detp_1 + (1.0/rfr_pc_enrichment_det)*t_det_1 +
(1.0-(1.0/rfr_pc_enrichment_det))*t_nh4 + (1.0-(1.0/rfr_pc_enrichment_det))*h2o
p_cya_mort_det_1 = (frac_det_1*t_cya*r_pp_mort*(1+9*theta(5.0e-6-t_o2)))*
lim_t_cya_19
```

**Production of POC by LPP [mol/kg/day]**

```
h2o + t_dic -> t_o2 + t_poc
p_assim_lpp_poc = (rfr_c * lpp_plus_lpp0 * lr_assim_lpp_poc)*lim_t_dic_13
```

**Production of POC by SPP [mol/kg/day]**

```
h2o + t_dic -> t_o2 + t_poc
p_assim_spp_poc = (rfr_c * spp_plus_spp0 * lr_assim_spp_poc)*lim_t_dic_13
```

**Production of POC by CYA [mol/kg/day]**

```
t_dic + h2o -> t_poc + t_o2
p_assim_cya_poc = (rfr_c * cya_plus_cya0 * lr_assim_cya_poc)*lim_t_dic_13
```

**Auxiliary variables****square of positive temperature [°C \* °C]**

```
temp_sq = max(0.0,cgt_temp)*max(0.0,cgt_temp)
```

**dissolved inorganic nitrogen [mol/kg]**

```
din = t_no3+t_nh4
```

continued on next page...

| Auxiliary variables, continued from previous page                                                               |                                                                                                                                                                                                                 |
|-----------------------------------------------------------------------------------------------------------------|-----------------------------------------------------------------------------------------------------------------------------------------------------------------------------------------------------------------|
| <b>squared phosphate [mol**2/kg**2]</b>                                                                         |                                                                                                                                                                                                                 |
| po4_sq =                                                                                                        | t_po4*t_po4                                                                                                                                                                                                     |
| <b>large-cell phytoplankton plus seed concentration [mol/kg]</b>                                                |                                                                                                                                                                                                                 |
| lpp_plus_lpp0 =                                                                                                 | t_lpp+lpp0                                                                                                                                                                                                      |
| <b>small-cell phytoplankton plus seed concentration [mol/kg]</b>                                                |                                                                                                                                                                                                                 |
| spp_plus_spp0 =                                                                                                 | t_spp+spp0                                                                                                                                                                                                      |
| <b>diazotroph cyanobacteria plus seed concentration [mol/kg]</b>                                                |                                                                                                                                                                                                                 |
| cya_plus_cya0 =                                                                                                 | t_cya+cya0                                                                                                                                                                                                      |
| <b>light limitation factor for large-cell phytoplankton growth [1]</b>                                          |                                                                                                                                                                                                                 |
| lim_light_lpp =                                                                                                 | cgt_light/max(cgt_light/2.0,light_opt_lpp)*exp(1-<br>cgt_light/max(cgt_light/2.0,light_opt_lpp))                                                                                                                |
| <b>light limitation factor for small-cell phytoplankton growth [1]</b>                                          |                                                                                                                                                                                                                 |
| temp1 =                                                                                                         | max(cgt_light/2.0,light_opt_spp)                                                                                                                                                                                |
| lim_light_spp =                                                                                                 | cgt_light/temp1*exp(1-cgt_light/temp1)                                                                                                                                                                          |
| <b>squared DIN [mol2/kg2]</b>                                                                                   |                                                                                                                                                                                                                 |
| din_sq =                                                                                                        | din*din                                                                                                                                                                                                         |
| <b>growth rate of diazotroph cyanobacteria, limited by DIP, light, oxygen, temperature and salinity [1/day]</b> |                                                                                                                                                                                                                 |
| lr_assim_cya =                                                                                                  | r_cya_assim*theta(t_o2-2*t_h2s)*min(po4_sq/(po4_sq+<br>dip_min_cya*dip_min_cya),lim_light_spp)*(1/(1+<br>exp(temp_min_cya-cgt_temp)))*(1/(1+exp(cgt_sali-<br>sali_max_cya)))*(1/(1+exp(sali_min_cya-cgt_sali))) |
| <b>growth rate of large-cell phytoplankton, limited by DIN, DIP, light and oxygen [1/day]</b>                   |                                                                                                                                                                                                                 |
| lr_assim_lpp =                                                                                                  | r_lpp_assim*theta(t_o2-2*t_h2s)*min(din_sq/(din_sq+<br>din_min_lpp*din_min_lpp),min(po4_sq/(po4_sq+din_min_lpp*<br>din_min_lpp*rfr_p*rfr_p),lim_light_lpp))                                                     |
| <b>growth rate of small-cell phytoplankton, limited by DIN, DIP, light, oxygen and temperature [1/day]</b>      |                                                                                                                                                                                                                 |
| lr_assim_spp =                                                                                                  | r_spp_assim*theta(t_o2-2*t_h2s)*min(din_sq/(din_sq+<br>din_min_spp*din_min_spp),min(po4_sq/(po4_sq+din_min_spp*<br>din_min_spp*rfr_p*rfr_p),lim_light_spp))*(1+<br>temp_sq/(temp_sq+temp_min_spp*temp_min_spp)) |
| continued on next page...                                                                                       |                                                                                                                                                                                                                 |

### Auxiliary variables, continued from previous page

#### production rate of POC by LPP

```
lr_assim_lpp_poc = fac_poc_assim * r_lpp_assim * theta(t_o2-2*t_h2s) *
min(max(1 - din_sq/(din_sq+din_min_lpp*din_min_lpp), 1 -
po4_sq/(din_min_lpp*din_min_lpp*rfr_p*rfr_p + po4_sq)),
lim_light_lpp)
```

#### production rate of POC by LPP

```
lr_assim_spp_poc = fac_poc_assim * r_lpp_assim * theta(t_o2-2*t_h2s) *
min(max(1 - din_sq/(din_sq+din_min_lpp*din_min_lpp), 1 -
po4_sq/(din_min_lpp*din_min_lpp*rfr_p*rfr_p + po4_sq)),
lim_light_lpp)
```

#### production rate of POC by CYA

```
lr_assim_cya_poc = fac_poc_assim * r_cya_assim*theta(t_o2-2*t_h2s)*min(1 -
po4_sq/(po4_sq+dip_min_cya*dip_min_cya),lim_light_spp)*
(1/(1+exp(temp_min_cya-cgt_temp)))*(1/(1+exp(cgt_sali-
sali_max_cya)))*(1/(1+exp(sali_min_cya-cgt_sali)))
```

### Constants

seed concentration for diazotroph cyanobacteria [mol/kg]

cya0 = 4.5E-9

DIN half saturation constant for large-cell phytoplankton growth [mol/kg]

din\_min\_lpp = 1.125E-6

DIN half saturation constant for small-cell phytoplankton growth [mol/kg]

din\_min\_spp = 4.5E-7

DIP half saturation constant for diazotroph cyanobacteria growth [mol/kg]

dip\_min\_cya = 1.125E-7

no division by 0

epsilon = 4.5E-17

optimal light for large-cell phytoplankton growth [W/m\*\*2]

light\_opt\_lpp = 35.0

optimal light for small-cell phytoplankton growth [W/m\*\*2]

light\_opt\_spp = 50.0

seed concentration for large-cell phytoplankton [mol/kg]

lpp0 = 4.5E-9

maximum rate for nutrient uptake of diazotroph cyanobacteria [1/day]

continued on next page...

| Constants, continued from previous page                              |        |
|----------------------------------------------------------------------|--------|
| r_cya_assim =                                                        | 0.75   |
| respiration rate of cyanobacteria to ammonium [1/day]                |        |
| r_cya_resp =                                                         | 0.01   |
| maximum rate for nutrient uptake of large-cell phytoplankton [1/day] |        |
| r_lpp_assim =                                                        | 1.4    |
| respiration rate of large phytoplankton to ammonium [1/day]          |        |
| r_lpp_resp =                                                         | 0.06   |
| mortality rate of phytoplankton [1/day]                              |        |
| r_pp_mort =                                                          | 0.02   |
| maximum rate for nutrient uptake of small-cell phytoplankton [1/day] |        |
| r_spp_assim =                                                        | 0.46   |
| respiration rate of small phytoplankton to ammonium [1/day]          |        |
| r_spp_resp =                                                         | 0.015  |
| redfield ratio C/N                                                   |        |
| rfr_c =                                                              | 6.625  |
| redfield ratio P/N                                                   |        |
| rfr_p =                                                              | 0.0625 |
| enrichment factor for P and C in detritus [1]                        |        |
| rfr_pc_enrichment_de<br>=                                            | 1.5    |
| upper salinity limit - diazotroph cyanobacteria [psu]                |        |
| sali_max_cya =                                                       | 10.0   |
| lower salinity limit - diazotroph cyanobacteria [psu]                |        |
| sali_min_cya =                                                       | 1.0    |
| seed concentration for small-cell phytoplankton [mol/kg]             |        |
| spp0 =                                                               | 4.5E-9 |
| lower temperature limit - diazotroph cyanobacteria [°C]              |        |
| temp_min_cya =                                                       | 13.5   |
| lower temperature limit - small-cell phytoplankton [°C]              |        |
| temp_min_spp =                                                       | 10.0   |
| continued on next page...                                            |        |

| Constants, continued from previous page |
|-----------------------------------------|
|-----------------------------------------|

|                                                |
|------------------------------------------------|
| <b>fraction of DON in respiration products</b> |
|------------------------------------------------|

|                    |
|--------------------|
| don_fraction = 0.1 |
|--------------------|

|                                                                         |
|-------------------------------------------------------------------------|
| <b>fraction of this detritus class in total detritus production [1]</b> |
|-------------------------------------------------------------------------|

|                   |
|-------------------|
| frac_det_1 = 0.26 |
|-------------------|

|                                                                         |
|-------------------------------------------------------------------------|
| <b>fraction of this detritus class in total detritus production [1]</b> |
|-------------------------------------------------------------------------|

|                   |
|-------------------|
| frac_det_2 = 0.16 |
|-------------------|

|                                                                         |
|-------------------------------------------------------------------------|
| <b>fraction of this detritus class in total detritus production [1]</b> |
|-------------------------------------------------------------------------|

|                   |
|-------------------|
| frac_det_3 = 0.16 |
|-------------------|

|                                                                         |
|-------------------------------------------------------------------------|
| <b>fraction of this detritus class in total detritus production [1]</b> |
|-------------------------------------------------------------------------|

|                   |
|-------------------|
| frac_det_4 = 0.16 |
|-------------------|

|                                                                         |
|-------------------------------------------------------------------------|
| <b>fraction of this detritus class in total detritus production [1]</b> |
|-------------------------------------------------------------------------|

|                   |
|-------------------|
| frac_det_5 = 0.08 |
|-------------------|

|                                                                         |
|-------------------------------------------------------------------------|
| <b>fraction of this detritus class in total detritus production [1]</b> |
|-------------------------------------------------------------------------|

|                   |
|-------------------|
| frac_det_6 = 0.18 |
|-------------------|

|                                                                                                             |
|-------------------------------------------------------------------------------------------------------------|
| <b>which fraction of DIC assimilation continues and causes POC production if nutrients are depleted [1]</b> |
|-------------------------------------------------------------------------------------------------------------|

|                     |
|---------------------|
| fac_poc_assim = 1.0 |
|---------------------|

| Process limitation factors |
|----------------------------|
|----------------------------|

|                               |
|-------------------------------|
| lim_t_n2_11 = theta(t_n2-0.0) |
|-------------------------------|

|                               |
|-------------------------------|
| lim_t_o2_12 = theta(t_o2-0.0) |
|-------------------------------|

|                                 |
|---------------------------------|
| lim_t_dic_13 = theta(t_dic-0.0) |
|---------------------------------|

|                                 |
|---------------------------------|
| lim_t_nh4_16 = theta(t_nh4-0.0) |
|---------------------------------|

|                                 |
|---------------------------------|
| lim_t_no3_14 = theta(t_no3-0.0) |
|---------------------------------|

|                                 |
|---------------------------------|
| lim_t_po4_15 = theta(t_po4-0.0) |
|---------------------------------|

|                                 |
|---------------------------------|
| lim_t_spp_18 = theta(t_spp-0.0) |
|---------------------------------|

|                                 |
|---------------------------------|
| lim_t_lpp_17 = theta(t_lpp-0.0) |
|---------------------------------|

|                                 |
|---------------------------------|
| lim_t_cya_19 = theta(t_cya-0.0) |
|---------------------------------|

|                           |
|---------------------------|
| continued on next page... |
|---------------------------|

Process limitation factors, continued from previous page

### 3.7 Process type BGC/pelagic/reoxidation

| Processes                                                                                                                                                    |                                                                                                                                                                                                                                                                                                                                                                                                                    |
|--------------------------------------------------------------------------------------------------------------------------------------------------------------|--------------------------------------------------------------------------------------------------------------------------------------------------------------------------------------------------------------------------------------------------------------------------------------------------------------------------------------------------------------------------------------------------------------------|
| <b>nitrification [mol/kg/day]</b>                                                                                                                            |                                                                                                                                                                                                                                                                                                                                                                                                                    |
| $\text{h2o} + 2*\text{t\_o2} + \text{t\_nh4} \rightarrow 2*\text{h3oplus} + \text{t\_no3}$                                                                   |                                                                                                                                                                                                                                                                                                                                                                                                                    |
| $\text{p\_nh4\_nit\_no3} =$                                                                                                                                  | $(\text{t\_nh4}*\text{r\_nh4\_nitrif}*\exp(\text{q10\_nit}*\text{cgt\_temp})*(1.0-\text{cgt\_in\_sediment}))*\text{lim\_t\_o2\_0}*\text{lim\_t\_nh4\_16}$                                                                                                                                                                                                                                                          |
| <b>oxidation of Fe2+ to iron hydroxide in the sediment [mol/kg/day]</b>                                                                                      |                                                                                                                                                                                                                                                                                                                                                                                                                    |
| $0.25*\text{t\_o2} + 4.5*\text{h2o} + \text{t\_fe2} \rightarrow \text{t\_ihw} + 2*\text{h3oplus}$                                                            |                                                                                                                                                                                                                                                                                                                                                                                                                    |
| $\text{p\_fe2\_ox\_ihw} =$                                                                                                                                   | $(\text{k\_feo2}*\text{t\_fe2}*\text{t\_o2}*\text{oh}*\text{oh}*(1.0-\text{cgt\_in\_sediment}))*\text{lim\_t\_o2\_12}*\text{lim\_t\_fe2\_55}$                                                                                                                                                                                                                                                                      |
| <b>nitrification in the sediment (sediment only) [mol/m<sup>2</sup>/day]</b>                                                                                 |                                                                                                                                                                                                                                                                                                                                                                                                                    |
| $2*\text{t\_o2} + \text{t\_aim} \rightarrow \text{h3oplus} + \text{t\_no3}$                                                                                  |                                                                                                                                                                                                                                                                                                                                                                                                                    |
| $\text{p\_aim\_nit\_no3\_sed} =$                                                                                                                             | $(\text{t\_aim}*\text{t\_o2}*\text{k\_nh4\_o2}*\exp(\text{q10\_nit}*\text{cgt\_temp})*\text{cgt\_in\_sediment})*\text{lim\_t\_o2\_1}*\text{lim\_t\_aim\_67}$                                                                                                                                                                                                                                                       |
| Auxiliary variables                                                                                                                                          |                                                                                                                                                                                                                                                                                                                                                                                                                    |
| <b>absolute temperature [K]</b>                                                                                                                              |                                                                                                                                                                                                                                                                                                                                                                                                                    |
| $\text{temp\_k} =$                                                                                                                                           | $\text{cgt\_temp} + 273.15$                                                                                                                                                                                                                                                                                                                                                                                        |
| <b>temporary value assumed for pH [1]</b>                                                                                                                    |                                                                                                                                                                                                                                                                                                                                                                                                                    |
| $\text{ph\_temp} =$                                                                                                                                          | $0.0-\log(\min(\max(\text{h3o}, 1.0\text{e-}12), 1.0\text{e-}2))/\log(10.0)$                                                                                                                                                                                                                                                                                                                                       |
| calculated iteratively, 10 iterations, initial value = 0.0                                                                                                   |                                                                                                                                                                                                                                                                                                                                                                                                                    |
| <b>self-ionization constant of Water [mol<sup>2</sup>/kg<sup>2</sup>]</b>                                                                                    |                                                                                                                                                                                                                                                                                                                                                                                                                    |
| $\text{k\_water} =$                                                                                                                                          | $\exp(-13847.26 / \text{temp\_k} + 148.96502 - 23.6521 * \log(\text{temp\_k}) + (118.67/\text{temp\_k} - 5.977 + 1.0495 * \log(\text{temp\_k})) * \sqrt{\text{cgt\_sali}} - 0.01615 * \text{cgt\_sali})$                                                                                                                                                                                                           |
| <b>Acid dissociation constant CO<sub>2</sub> + 2 H<sub>2</sub>O &lt;-&gt; HCO<sub>3</sub><sup>-</sup> + H<sub>3</sub>O<sup>+</sup> [mol/kg]</b>              |                                                                                                                                                                                                                                                                                                                                                                                                                    |
| $\text{k1\_co2} =$                                                                                                                                           | $\text{power}(10.0, (-3633.86 / \text{temp\_k} + 61.2172 - 9.6777 * \log(\text{temp\_k}) + 0.011555 * \text{cgt\_sali} - 0.0001152 * \text{cgt\_sali} * \text{cgt\_sali}))$                                                                                                                                                                                                                                        |
| <b>Acid dissociation constant HCO<sub>3</sub><sup>-</sup> + H<sub>2</sub>O &lt;-&gt; [CO<sub>3</sub><sup>2-</sup>] + H<sub>3</sub>O<sup>+</sup> [mol/kg]</b> |                                                                                                                                                                                                                                                                                                                                                                                                                    |
| $\text{k2\_co2} =$                                                                                                                                           | $\text{power}(10.0, (-471.78 / \text{temp\_k} - 25.929 + 3.16967 * \log(\text{temp\_k}) + 0.01781 * \text{cgt\_sali} - 0.0001122 * \text{cgt\_sali} * \text{cgt\_sali}))$                                                                                                                                                                                                                                          |
| <b>Acid dissociation constant of boric acid [mol/kg]</b>                                                                                                     |                                                                                                                                                                                                                                                                                                                                                                                                                    |
| $\text{k\_boron} =$                                                                                                                                          | $\exp((-8966.9 - 2890.53*\sqrt{\text{cgt\_sali}} - 77.942*\text{cgt\_sali} + 1.728*\text{cgt\_sali}*\sqrt{\text{cgt\_sali}} - 0.0996*\text{cgt\_sali}*\text{cgt\_sali}) / \text{temp\_k} + 148.0248 + 137.1942*\sqrt{\text{cgt\_sali}} + 1.62142*\text{cgt\_sali} + (-24.4344 - 25.085*\sqrt{\text{cgt\_sali}} - 0.2474*\text{cgt\_sali})*\log(\text{temp\_k}) + 0.053105*\sqrt{\text{cgt\_sali}}*\text{temp\_k})$ |
| continued on next page...                                                                                                                                    |                                                                                                                                                                                                                                                                                                                                                                                                                    |

## Auxiliary variables, continued from previous page

**Acid dissociation constant  $\text{H}_3\text{PO}_4 + \text{H}_2\text{O} \rightleftharpoons [\text{H}_2\text{PO}_4^-] + \text{H}_3\text{O}^+$  [mol/kg]**

$$k1\_po4 = \exp(-4576.752/\text{temp\_k} + 115.525 - 18.453 \cdot \log(\text{temp\_k}) + (0.69171 - 106.736/\text{temp\_k}) \cdot \sqrt{\text{cgt\_sali}} - (0.01844 + 0.65643/\text{temp\_k}) \cdot \text{cgt\_sali})$$

**Acid dissociation constant  $[\text{H}_2\text{PO}_4^-] + \text{H}_2\text{O} \rightleftharpoons [\text{HPO}_4^{2-}] + \text{H}_3\text{O}^+$  [mol/kg]**

$$k2\_po4 = \exp(-8814.715/\text{temp\_k} + 172.0883 - 27.927 \cdot \log(\text{temp\_k}) + (1.35660 - 160.340/\text{temp\_k}) \cdot \sqrt{\text{cgt\_sali}} - (0.05778 - 0.37335/\text{temp\_k}) \cdot \text{cgt\_sali})$$

**Acid dissociation constant  $[\text{HPO}_4^{2-}] + \text{H}_2\text{O} \rightleftharpoons [\text{PO}_4^{3-}] + \text{H}_3\text{O}^+$  [mol/kg]**

$$k3\_po4 = \exp(-3070.75/\text{temp\_k} - 18.141 + (2.81197 + 17.27039/\text{temp\_k}) \cdot \sqrt{\text{cgt\_sali}} - (0.09984 + 44.99486/\text{temp\_k}) \cdot \text{cgt\_sali})$$

**Acid dissociation constant  $\text{H}_2\text{S} + \text{H}_2\text{O} \rightleftharpoons \text{HS}^- + \text{H}_3\text{O}^+$  [mol/kg]**

$$k1\_h2s = \exp(-3131.42/\text{temp\_k} - 5.818 + 0.368 \cdot (\text{power}(\max(0.0, \text{cgt\_sali}), (1.0/3.0))))$$

**total concentration of boron [mol/kg]**

$$\text{boron\_total} = 0.000416 \cdot \text{cgt\_sali}/35.0$$

**boron alkalinity [mol/kg]**

$$\text{alk\_boron} = \text{boron\_total} \cdot k\_boron / (k\_boron + h3o)$$

calculated iteratively, 10 iterations, initial value = 0.0

**hydrogen sulfide alkalinity [mol/kg]**

$$\text{alk\_h2s} = t\_h2s \cdot k1\_h2s / (k1\_h2s + h3o)$$

calculated iteratively, 10 iterations, initial value = 0.0

**water alkalinity [mol/kg]**

$$\text{alk\_water} = k\_water / h3o - h3o$$

calculated iteratively, 10 iterations, initial value = 0.0

**denominator in phosphate alkalinity formula [mol<sup>3</sup>/kg<sup>3</sup>]**

$$\text{alk\_po4\_denominator} = (h3o \cdot h3o \cdot h3o + k1\_po4 \cdot h3o \cdot h3o + k1\_po4 \cdot k2\_po4 \cdot h3o + k1\_po4 \cdot k2\_po4 \cdot k3\_po4)$$

calculated iteratively, 10 iterations, initial value = 0.0

**phosphate alkalinity [mol/kg]**

$$\text{alk\_po4} = (t\_po4 \cdot (k1\_po4 \cdot k2\_po4 \cdot h3o + 2.0 \cdot k1\_po4 \cdot k2\_po4 \cdot k3\_po4 - h3o \cdot h3o \cdot h3o)) / \text{alk\_po4\_denominator}$$

calculated iteratively, 10 iterations, initial value = 0.0

continued on next page...



### Auxiliary variables, continued from previous page

#### denominator in carbonate alkalinity formula [mol<sup>2</sup>/kg<sup>2</sup>]

alk\_co2\_denominator (h3o\*h3o + k1\_co2\*h3o + k1\_co2\*k2\_co2)  
=

calculated iteratively, 10 iterations, initial value = 0.0

#### carbonate alkalinity [mol/kg]

alk\_co2 = t\_dic\*k1\_co2\*(h3o+2\*k2\_co2)/alk\_co2\_denominator

calculated iteratively, 10 iterations, initial value = 0.0

#### error in total alkalinity calculation at the assumed pH [mol/kg]

alk\_residual = t\_alk - alk\_co2 - alk\_po4 - alk\_boron - alk\_h2s - alk\_water

calculated iteratively, 10 iterations, initial value = 0.0

#### derivative of phosphate alkalinity with respect to h3o [1]

dalkp\_dh3o = t\_po4\*(0.0-k1\_po4\*h3o\*h3o\*h3o-h3o-4\*k1\_po4\*k2\_po4\*h3o\*h3o\*  
h3o-(k1\_po4\*k1\_po4\*k2\_po4+9\*k1\_po4\*k2\_po4\*k3\_po4)\*h3o\*h3o-  
4\*k1\_po4\*k1\_po4\*k2\_po4\*k3\_po4\*h3o-k1\_po4\*k1\_po4\*k2\_po4\*  
k2\_po4\*k3\_po4)/(alk\_po4\_denominator\*alk\_po4\_denominator)

calculated iteratively, 10 iterations, initial value = 0.0

#### derivative of carbonate alkalinity with respect to h3o [1]

dalkc\_dh3o = t\_dic\*(0.0-k1\_co2\*h3o\*h3o-k1\_co2\*k1\_co2\*k2\_co2-4\*k1\_co2\*  
k2\_co2\*h3o)/(alk\_co2\_denominator\*alk\_co2\_denominator)

calculated iteratively, 10 iterations, initial value = 0.0

#### derivative of residual\_alk with respect to pH [mol/kg]

dalkresidual\_dpH = 0.0-log(10.0)\*h3o\*(alk\_boron/(k\_boron+h3o)+alk\_h2s/(k1\_h2s+  
h3o)+k\_water/(h3o\*h3o)+1-dalkp\_dh3o-dalkc\_dh3o)

calculated iteratively, 10 iterations, initial value = 0.0

#### newly determined pH value [1]

temp1 = alk\_residual/dalkresidual\_dpH

ph = ph\_temp - temp1 + theta(abs(temp1) - 1)\*0.5\*temp1

calculated iteratively, 10 iterations, initial value = 0.0

#### h3o ion concentration [mol/kg]

h3o = power(10.0,0.0-max(1.0,min(13.0,ph)))

calculated iteratively, 10 iterations, initial value = 1.0e-8

#### h3o ion concentration [mol/kg]

oh = power(10.0,log(k\_water)/log(10.0)+max(1.0,min(13.0,ph)))

#### ionic strength of the solution [mol/kg]

ionic\_strength = 0.02\*cgt\_sali

continued on next page...

### Auxiliary variables, continued from previous page

#### rate constant iron-II oxidation by o2 [kg3/mol3/d]

```
k_feo2 = power(10.0,21.56-1545.0/temp_k-3.29*
              power(ionic_strength,0.5)+1.52*ionic_strength)
```

### Constants

#### oxygen half-saturation constant for nitrification [mol/kg]

```
o2_min_nit = 1.0E-6
```

#### q10 rule factor for nitrification [1/K]

```
q10_nit = 0.11
```

#### nitrification rate at 0°C [1/day]

```
r_nh4_nitrif = 0.1
```

#### nitrification rate for ammonium in the sediment at 0°C [1/d]

```
k_nh4_o2 = 274000.0
```

### Process limitation factors

```
lim_t_o2_0 = 1.0-exp(-t_o2/o2_min_nit)
```

```
lim_t_o2_1 = t_o2/(t_o2+o2_min_nit)
```

```
lim_t_o2_12 = theta(t_o2-0.0)
```

```
lim_t_nh4_16 = theta(t_nh4-0.0)
```

```
lim_t_fe2_55 = theta(t_fe2-0.0)
```

```
lim_t_aim_67 = theta(t_aim-0.0)
```

### 3.8 Process type BGC/pelagic/zooplankton

| Processes                                                                                                                                                                                                         |                                                                                                                                                                                                                                                                                                                   |
|-------------------------------------------------------------------------------------------------------------------------------------------------------------------------------------------------------------------|-------------------------------------------------------------------------------------------------------------------------------------------------------------------------------------------------------------------------------------------------------------------------------------------------------------------|
| grazing of zooplankton eating large-cell phytoplankton [mol/kg/day]                                                                                                                                               |                                                                                                                                                                                                                                                                                                                   |
| t_lpp -> t_zoo                                                                                                                                                                                                    |                                                                                                                                                                                                                                                                                                                   |
| p_lpp_graz_zoo =                                                                                                                                                                                                  | $((t_{\text{zoo}} + \text{zoo0}) * \text{lr\_graz\_zoo} * t_{\text{lpp}} / \max(\text{food\_zoo}, \text{epsilon})) * \text{lim\_t\_lpp\_17}$                                                                                                                                                                      |
| grazing of zooplankton eating small-cell phytoplankton [mol/kg/day]                                                                                                                                               |                                                                                                                                                                                                                                                                                                                   |
| t_spp -> t_zoo                                                                                                                                                                                                    |                                                                                                                                                                                                                                                                                                                   |
| p_spp_graz_zoo =                                                                                                                                                                                                  | $((t_{\text{zoo}} + \text{zoo0}) * \text{lr\_graz\_zoo} * t_{\text{spp}} / \max(\text{food\_zoo}, \text{epsilon})) * \text{lim\_t\_spp\_18}$                                                                                                                                                                      |
| grazing of zooplankton eating diazotroph cyanobacteria [mol/kg/day]                                                                                                                                               |                                                                                                                                                                                                                                                                                                                   |
| t_cya -> t_zoo                                                                                                                                                                                                    |                                                                                                                                                                                                                                                                                                                   |
| p_cya_graz_zoo =                                                                                                                                                                                                  | $((t_{\text{zoo}} + \text{zoo0}) * \text{lr\_graz\_zoo} * (0.5 * t_{\text{cya}}) / \max(\text{food\_zoo}, \text{epsilon})) * \text{lim\_t\_cya\_19}$                                                                                                                                                              |
| respiration of zooplankton [mol/kg/day]                                                                                                                                                                           |                                                                                                                                                                                                                                                                                                                   |
| 0.8125*h3oplus + 6.625*t_o2 + t_zoo -> 7.4375*h2o + rfr_c*t_dic + rfr_p*t_po4 + (1-don_fraction)*t_nh4 + don_fraction*t_don                                                                                       |                                                                                                                                                                                                                                                                                                                   |
| p_zoo_resp_nh4 =                                                                                                                                                                                                  | $(\text{zoo\_eff} * r_{\text{zoo\_resp}} * (1.0 - \text{cgt\_in\_sediment})) * \text{lim\_t\_o2\_12} * \text{lim\_t\_zoo\_20}$                                                                                                                                                                                    |
| mortality of zooplankton (index 1 to 6) [mol/kg/day]                                                                                                                                                              |                                                                                                                                                                                                                                                                                                                   |
| (1.0-(1.0/rfr_pc_enrichment_det))*h3oplus + t_zoo -> (1.0-(1.0/rfr_pc_enrichment_det))*h2o + (1.0-(1.0/rfr_pc_enrichment_det))*t_nh4 + (1.0/rfr_pc_enrichment_det)*t_det_1 + (1.0/rfr_pc_enrichment_det)*t_detp_1 |                                                                                                                                                                                                                                                                                                                   |
| p_zoo_mort_det_1 =                                                                                                                                                                                                | $(\text{frac\_det\_1} * \text{zoo\_eff} * r_{\text{zoo\_mort}} * (1 + 9 * \theta(5.0e-6 - t_{\text{o2}}))) * \text{lim\_t\_zoo\_20}$                                                                                                                                                                              |
| Auxiliary variables                                                                                                                                                                                               |                                                                                                                                                                                                                                                                                                                   |
| square of positive temperature [°C * °C]                                                                                                                                                                          |                                                                                                                                                                                                                                                                                                                   |
| temp_sq =                                                                                                                                                                                                         | $\max(0.0, \text{cgt\_temp}) * \max(0.0, \text{cgt\_temp})$                                                                                                                                                                                                                                                       |
| effectice zooplankton concentration assumed for mortality and respiration process [mol/kg]                                                                                                                        |                                                                                                                                                                                                                                                                                                                   |
| zoo_eff =                                                                                                                                                                                                         | $t_{\text{zoo}} * t_{\text{zoo}} / \text{zoo\_cl}$                                                                                                                                                                                                                                                                |
| suitable food for zooplankton (weighted with food preferences) [mol/kg]                                                                                                                                           |                                                                                                                                                                                                                                                                                                                   |
| food_zoo =                                                                                                                                                                                                        | $t_{\text{lpp}} + t_{\text{spp}} + 0.5 * t_{\text{cya}}$                                                                                                                                                                                                                                                          |
| growth rate of zooplankton, limited by food, oxygen and temperature [1/day]                                                                                                                                       |                                                                                                                                                                                                                                                                                                                   |
| lr_graz_zoo =                                                                                                                                                                                                     | $r_{\text{zoo\_graz}} * (1 - \exp(-\text{food\_zoo} * \text{food\_zoo} / (\text{food\_min\_zoo} * \text{food\_min\_zoo}))) * \theta(t_{\text{o2}} - 2 * t_{\text{h2s}}) * (1.0 + \text{temp\_sq} / (\text{temp\_opt\_zoo} * \text{temp\_opt\_zoo}) * \exp(2.0 - \text{cgt\_temp} * 2.0 / \text{temp\_opt\_zoo}))$ |
| continued on next page...                                                                                                                                                                                         |                                                                                                                                                                                                                                                                                                                   |

## Auxiliary variables, continued from previous page

| Constants                                                          |          |
|--------------------------------------------------------------------|----------|
| no division by 0                                                   |          |
| epsilon =                                                          | 4.5E-17  |
| Ivlev phytoplankton concentration for zooplankton grazing [mol/kg] |          |
| food_min_zoo =                                                     | 4.108E-6 |
| maximum zooplankton grazing rate [1/day]                           |          |
| r_zoo_graz =                                                       | 0.5      |
| mortality rate of zooplankton [1/day]                              |          |
| r_zoo_mort =                                                       | 0.03     |
| respiration rate of zooplankton [1/day]                            |          |
| r_zoo_resp =                                                       | 0.01     |
| redfield ratio C/N                                                 |          |
| rfr_c =                                                            | 6.625    |
| redfield ratio P/N                                                 |          |
| rfr_p =                                                            | 0.0625   |
| enrichment factor for P and C in detritus [1]                      |          |
| rfr_pc_enrichment_de                                               | 1.5      |
| =                                                                  |          |
| optimal temperature for zooplankton grazing [°C]                   |          |
| temp_opt_zoo =                                                     | 20.0     |
| seed concentration for zooplankton [mol/kg]                        |          |
| zoo0 =                                                             | 4.5E-9   |
| zooplankton closure parameter [mol/kg]                             |          |
| zoo_cl =                                                           | 9.0E-8   |
| fraction of DON in respiration products                            |          |
| don_fraction =                                                     | 0.1      |
| fraction of this detritus class in total detritus production [1]   |          |
| frac_det_1 =                                                       | 0.26     |
| fraction of this detritus class in total detritus production [1]   |          |
| continued on next page...                                          |          |

| Constants, continued from previous page                          |                  |
|------------------------------------------------------------------|------------------|
| frac_det_2 =                                                     | 0.16             |
| fraction of this detritus class in total detritus production [1] |                  |
| frac_det_3 =                                                     | 0.16             |
| fraction of this detritus class in total detritus production [1] |                  |
| frac_det_4 =                                                     | 0.16             |
| fraction of this detritus class in total detritus production [1] |                  |
| frac_det_5 =                                                     | 0.08             |
| fraction of this detritus class in total detritus production [1] |                  |
| frac_det_6 =                                                     | 0.18             |
| Process limitation factors                                       |                  |
| lim_t_o2_12 =                                                    | theta(t_o2-0.0)  |
| lim_t_spp_18 =                                                   | theta(t_spp-0.0) |
| lim_t_zoo_20 =                                                   | theta(t_zoo-0.0) |
| lim_t_lpp_17 =                                                   | theta(t_lpp-0.0) |
| lim_t_cya_19 =                                                   | theta(t_cya-0.0) |

### 3.9 Process type gas\_exchange

| Processes                                                                           |                                                                                                                                                                   |
|-------------------------------------------------------------------------------------|-------------------------------------------------------------------------------------------------------------------------------------------------------------------|
| downward nitrogen flux through the surface (surface only) [mol/m <sup>2</sup> /day] |                                                                                                                                                                   |
| -> t_n2                                                                             |                                                                                                                                                                   |
| p_n2_stf_down =                                                                     | w_n2_stf*(n2_sat-t_n2)*theta(n2_sat-t_n2)*cgt_density                                                                                                             |
| upward nitrogen flux through the surface (surface only) [mol/m <sup>2</sup> /day]   |                                                                                                                                                                   |
| t_n2 ->                                                                             |                                                                                                                                                                   |
| p_n2_stf_up =                                                                       | (w_n2_stf*(t_n2-n2_sat)*theta(t_n2-n2_sat)*cgt_density)*<br>lim_t_n2_11                                                                                           |
| downward oxygen flux through the surface (surface only) [mol/m <sup>2</sup> /day]   |                                                                                                                                                                   |
| -> t_o2                                                                             |                                                                                                                                                                   |
| p_o2_stf_down =                                                                     | w_o2_stf*(o2_sat-t_o2)*theta(o2_sat-t_o2)*cgt_density                                                                                                             |
| upward oxygen flux through the surface (surface only) [mol/m <sup>2</sup> /day]     |                                                                                                                                                                   |
| t_o2 ->                                                                             |                                                                                                                                                                   |
| p_o2_stf_up =                                                                       | (w_o2_stf*(t_o2-o2_sat)*theta(t_o2-o2_sat)*cgt_density)*<br>lim_t_o2_12                                                                                           |
| downward co2 flux through the surface (surface only) [mol/m <sup>2</sup> /day]      |                                                                                                                                                                   |
| -> t_dic                                                                            |                                                                                                                                                                   |
| p_co2_stf_down =                                                                    | w_co2_stf*(patm_co2-pco2)*k0_co2*theta(patm_co2-pco2)*<br>cgt_density                                                                                             |
| upward co2 flux through the surface (surface only) [mol/m <sup>2</sup> /day]        |                                                                                                                                                                   |
| t_dic ->                                                                            |                                                                                                                                                                   |
| p_co2_stf_up =                                                                      | (w_co2_stf*(pco2-patm_co2)*k0_co2*theta(pco2-patm_co2)*<br>cgt_density)*lim_t_dic_13                                                                              |
| Auxiliary variables                                                                 |                                                                                                                                                                   |
| absolute temperature [K]                                                            |                                                                                                                                                                   |
| temp_k =                                                                            | cgt_temp + 273.15                                                                                                                                                 |
| temporary value assumed for pH [1]                                                  |                                                                                                                                                                   |
| ph_temp =                                                                           | 0.0-log(min(max(h3o,1.0e-12),1.0e-2))/log(10.0)                                                                                                                   |
| calculated iteratively, 10 iterations, initial value = 0.0                          |                                                                                                                                                                   |
| self-ionization constant of Water [mol <sup>2</sup> /kg <sup>2</sup> ]              |                                                                                                                                                                   |
| k_water =                                                                           | exp( -13847.26 / temp_k + 148.96502 - 23.6521 * log(temp_k)<br>+ (118.67/temp_k - 5.977 + 1.0495 * log(temp_k)) *<br>sqrt(cgt_sali) - 0.01615 * cgt_sali)         |
| Solubility of CO2 [mol/kg/Pa]                                                       |                                                                                                                                                                   |
| k0_co2 =                                                                            | exp(9345.17 / temp_k - 60.2409 + 23.3585 * (log(temp_k) -<br>4.605170186) + cgt_sali*(0.023517 - 0.00023656 * temp_k +<br>0.00000047036 *temp_k*temp_k))/101325.0 |
| continued on next page...                                                           |                                                                                                                                                                   |

### Auxiliary variables, continued from previous page

#### Acid dissociation constant $\text{CO}_2 + 2 \text{H}_2\text{O} \rightleftharpoons \text{HCO}_3^- + \text{H}_3\text{O}^+$ [mol/kg]

```
k1_co2 = power(10.0, ( -3633.86 / temp_k + 61.2172 - 9.6777 *
log(temp_k) + 0.011555 * cgt_sali - 0.0001152 * cgt_sali *
cgt_sali))
```

#### Acid dissociation constant $\text{HCO}_3^- + \text{H}_2\text{O} \rightleftharpoons [\text{CO}_3^{2-}] + \text{H}_3\text{O}^+$ [mol/kg]

```
k2_co2 = power(10.0, ( -471.78 / temp_k - 25.929 + 3.16967 *
log(temp_k) + 0.01781 * cgt_sali - 0.0001122 * cgt_sali *
cgt_sali))
```

#### Acid dissociation constant of boric acid [mol/kg]

```
k_boron = exp(( -8966.9 - 2890.53*sqrt(cgt_sali) - 77.942*cgt_sali +
1.728*cgt_sali*sqrt(cgt_sali) - 0.0996*cgt_sali*cgt_sali) /
temp_k + 148.0248 + 137.1942*sqrt(cgt_sali) + 1.62142*
cgt_sali + (-24.4344 - 25.085*sqrt(cgt_sali) - 0.2474*
cgt_sali)*log(temp_k) + 0.053105*sqrt(cgt_sali)*temp_k )
```

#### Acid dissociation constant $\text{H}_3\text{PO}_4 + \text{H}_2\text{O} \rightleftharpoons [\text{H}_2\text{PO}_4^-] + \text{H}_3\text{O}^+$ [mol/kg]

```
k1_po4 = exp( -4576.752/temp_k + 115.525 - 18.453*log(temp_k) +
(0.69171 - 106.736/temp_k)*sqrt(cgt_sali) - (0.01844 +
0.65643/temp_k)*cgt_sali )
```

#### Acid dissociation constant $[\text{H}_2\text{PO}_4^-] + \text{H}_2\text{O} \rightleftharpoons [\text{HPO}_4^{2-}] + \text{H}_3\text{O}^+$ [mol/kg]

```
k2_po4 = exp( -8814.715/temp_k + 172.0883 - 27.927*log(temp_k) +
(1.35660 - 160.340/temp_k)*sqrt(cgt_sali) - (0.05778 -
0.37335/temp_k)*cgt_sali )
```

#### Acid dissociation constant $[\text{HPO}_4^{2-}] + \text{H}_2\text{O} \rightleftharpoons [\text{PO}_4^{3-}] + \text{H}_3\text{O}^+$ [mol/kg]

```
k3_po4 = exp( -3070.75/temp_k - 18.141 + (2.81197 + 17.27039/temp_k)
*sqrt(cgt_sali) - (0.09984 + 44.99486/temp_k)*cgt_sali )
```

#### Acid dissociation constant $\text{H}_2\text{S} + \text{H}_2\text{O} \rightleftharpoons \text{HS}^- + \text{H}_3\text{O}^+$ [mol/kg]

```
k1_h2s = exp( -3131.42/temp_k - 5.818 + 0.368*
(power(max(0.0, cgt_sali), (1.0/3.0))))
```

#### total concentration of boron [mol/kg]

```
boron_total = 0.000416 * cgt_sali/35.0
```

#### boron alkalinity [mol/kg]

```
alk_boron = boron_total * k_boron / (k_boron + h3o)
calculated iteratively, 10 iterations, initial value = 0.0
```

#### hydrogen sulfide alkalinity [mol/kg]

continued on next page...

### Auxiliary variables, continued from previous page

$\text{alk\_h2s} = \text{t\_h2s} * \text{k1\_h2s} / (\text{k1\_h2s} + \text{h3o})$

calculated iteratively, 10 iterations, initial value = 0.0

### water alkalinity [mol/kg]

$\text{alk\_water} = \text{k\_water} / \text{h3o} - \text{h3o}$

calculated iteratively, 10 iterations, initial value = 0.0

### denominator in phosphate alkalinity formula [mol3/kg3]

$\text{alk\_po4\_denominator} (\text{h3o} * \text{h3o} * \text{h3o} + \text{k1\_po4} * \text{h3o} * \text{h3o} + \text{k1\_po4} * \text{k2\_po4} * \text{h3o} + \text{k1\_po4} * \text{k2\_po4} * \text{k3\_po4})$

calculated iteratively, 10 iterations, initial value = 0.0

### phosphate alkalinity [mol/kg]

$\text{alk\_po4} = \text{t\_po4} * (\text{k1\_po4} * \text{k2\_po4} * \text{h3o} + 2.0 * \text{k1\_po4} * \text{k2\_po4} * \text{k3\_po4} - \text{h3o} * \text{h3o} * \text{h3o}) / \text{alk\_po4\_denominator}$

calculated iteratively, 10 iterations, initial value = 0.0

### denominator in carbonate alkalinity formula [mol2/kg2]

$\text{alk\_co2\_denominator} (\text{h3o} * \text{h3o} + \text{k1\_co2} * \text{h3o} + \text{k1\_co2} * \text{k2\_co2})$

=

calculated iteratively, 10 iterations, initial value = 0.0

### carbonate alkalinity [mol/kg]

$\text{alk\_co2} = \text{t\_dic} * \text{k1\_co2} * (\text{h3o} + 2 * \text{k2\_co2}) / \text{alk\_co2\_denominator}$

calculated iteratively, 10 iterations, initial value = 0.0

### error in total alkalinity calculation at the assumed pH [mol/kg]

$\text{alk\_residual} = \text{t\_alk} - \text{alk\_co2} - \text{alk\_po4} - \text{alk\_boron} - \text{alk\_h2s} - \text{alk\_water}$

calculated iteratively, 10 iterations, initial value = 0.0

### derivative of phosphate alkalinity with respect to h3o [1]

$\text{dalkp\_dh3o} = \text{t\_po4} * (0.0 - \text{k1\_po4} * \text{h3o} * \text{h3o} * \text{h3o} * \text{h3o} - 4 * \text{k1\_po4} * \text{k2\_po4} * \text{h3o} * \text{h3o} - \text{h3o} - (\text{k1\_po4} * \text{k1\_po4} * \text{k2\_po4} + 9 * \text{k1\_po4} * \text{k2\_po4} * \text{k3\_po4}) * \text{h3o} * \text{h3o} - 4 * \text{k1\_po4} * \text{k1\_po4} * \text{k2\_po4} * \text{k3\_po4} * \text{h3o} - \text{k1\_po4} * \text{k1\_po4} * \text{k2\_po4} * \text{k2\_po4} * \text{k3\_po4}) / (\text{alk\_po4\_denominator} * \text{alk\_po4\_denominator})$

calculated iteratively, 10 iterations, initial value = 0.0

### derivative of carbonate alkalinity with respect to h3o [1]

$\text{dalkc\_dh3o} = \text{t\_dic} * (0.0 - \text{k1\_co2} * \text{h3o} * \text{h3o} - \text{k1\_co2} * \text{k1\_co2} * \text{k2\_co2} - 4 * \text{k1\_co2} * \text{k2\_co2} * \text{h3o}) / (\text{alk\_co2\_denominator} * \text{alk\_co2\_denominator})$

calculated iteratively, 10 iterations, initial value = 0.0

### derivative of residual\_alk with respect to pH [mol/kg]

$\text{dalkresidual\_dpH} = 0.0 - \log(10.0) * \text{h3o} * (\text{alk\_boron} / (\text{k\_boron} + \text{h3o}) + \text{alk\_h2s} / (\text{k1\_h2s} + \text{h3o}) + \text{k\_water} / (\text{h3o} * \text{h3o}) + 1 - \text{dalkp\_dh3o} - \text{dalkc\_dh3o})$

continued on next page...



### Auxiliary variables, continued from previous page

calculated iteratively, 10 iterations, initial value = 0.0

#### newly determined pH value [1]

```
temp1 =      alk_residual/dalkresidual_dpH
ph =      ph_temp - temp1 + theta(abs(temp1) - 1)*0.5*temp1
calculated iteratively, 10 iterations, initial value = 0.0
```

#### h3o ion concentration [mol/kg]

```
h3o =      power(10.0,0.0-max(1.0,min(13.0,ph)))
calculated iteratively, 10 iterations, initial value = 1.0e-8
```

#### co2 partial pressure [Pa]

```
pco2 =      t_dic / k0_co2 / (1 + k1_co2/h3o + k1_co2*k2_co2/h3o/h3o)
```

#### oxygen saturation concentration [mol/kg]

```
o2_sat =      (10.18e0+((5.306e-3-4.8725e-5*cgt_temp)*cgt_temp-0.2785e0)*
cgt_temp+cgt_sali*((2.2258e-3+(4.39e-7*cgt_temp-4.645e-5)*
cgt_temp)*cgt_temp-6.33e-2))*44.66e0*1e-6
```

#### dissolved molecular nitrogen saturation concentration [mol/kg]

```
temp1 =      log((298.15-cgt_temp)/(273.15+cgt_temp))
temp2 =      temp1*temp1
temp3 =      temp2*temp1
n2_sat =      1e-6*exp(6.42931 + 2.92704*temp1 + 4.32531*temp2 + 4.69149*
temp3 + cgt_sali*(0.0 -7.44129e-3 - 8.02566e-3*temp1 -
1.46775e-2*temp2))
```

### Constants

#### atmospheric partial pressure of CO2 [Pa]

```
patm_co2 =      35.8
```

#### piston velocity for co2 surface flux [m/d]

```
w_co2_stf =      0.5
```

#### piston velocity for n2 surface flux [m/d]

```
w_n2_stf =      5.0
```

#### piston velocity for oxygen surface flux [m/d]

```
w_o2_stf =      5.0
```

### Process limitation factors

```
lim_t_n2_11 =      theta(t_n2-0.0)
```

```
lim_t_o2_12 =      theta(t_o2-0.0)
```

```
lim_t_dic_13 =      theta(t_dic-0.0)
```

continued on next page...

|                                                          |
|----------------------------------------------------------|
| Process limitation factors, continued from previous page |
|----------------------------------------------------------|

### 3.10 Process type only1d

| Processes                                                                                                                                                                                 |
|-------------------------------------------------------------------------------------------------------------------------------------------------------------------------------------------|
| <b>transport from fluffy layer to deep basins (sediment only) [mol/m<sup>2</sup>/day]</b><br>t_ihs -><br>p_ihs_removal = (r_fluffy_moveaway*t_ihs*(1.0-cgt_in_sediment))*<br>lim_t_ihs_53 |
| <b>transport from fluffy layer to deep basins (sediment only) [mol/m<sup>2</sup>/day]</b><br>t_ips -><br>p_ips_removal = (r_fluffy_moveaway*t_ips*(1.0-cgt_in_sediment))*<br>lim_t_ips_52 |
| <b>transport from fluffy layer to deep basins (sediment only) [mol/m<sup>2</sup>/day]</b><br>t_ims -><br>p_ims_removal = (r_fluffy_moveaway*t_ims*(1.0-cgt_in_sediment))*<br>lim_t_ims_57 |
| <b>transport from fluffy layer to deep basins (sediment only) [mol/m<sup>2</sup>/day]</b><br>t_pyr -><br>p_pyr_removal = (r_fluffy_moveaway*t_pyr*(1.0-cgt_in_sediment))*<br>lim_t_pyr_58 |
| <b>transport from fluffy layer to deep basins (sediment only) [mol/m<sup>2</sup>/day]</b><br>t_mos -><br>p_mos_removal = (r_fluffy_moveaway*t_mos*(1.0-cgt_in_sediment))*<br>lim_t_mos_59 |
| <b>transport from fluffy layer to deep basins (sediment only) [mol/m<sup>2</sup>/day]</b><br>t_rho -><br>t_rho_removal = (r_fluffy_moveaway*t_rho*(1.0-cgt_in_sediment))*<br>lim_t_rho_60 |
| <b>transport from fluffy layer to deep basins (sediment only) [mol/m<sup>2</sup>/day]</b><br>t_iim -><br>p_iim_removal = (r_fluffy_moveaway*t_iim*(1.0-cgt_in_sediment))*<br>lim_t_iim_61 |
| <b>transport from fluffy layer to deep basins (sediment only) [mol/m<sup>2</sup>/day]</b><br>t_ihc -><br>p_ihc_removal = (r_fluffy_moveaway*t_ihc*(1.0-cgt_in_sediment))*<br>lim_t_ihc_54 |
| <b>transport from fluffy layer to deep basins (index 1 to 6) (sediment only)</b><br><b>[mol/m<sup>2</sup>/day]</b>                                                                        |
| continued on next page...                                                                                                                                                                 |

## Processes, continued from previous page

t\_sed\_1 ->

p\_sed\_1\_removal = (r\_fluffy\_moveaway\*t\_sed\_1\*(1.0-cgt\_in\_sediment))\*  
lim\_t\_sed\_1\_22

**transport from fluffy layer to deep basins (index 1 to 6) (sediment only)**  
[mol/m<sup>2</sup>/day]

t\_sedp\_1 ->

p\_sedp\_1\_removal = (r\_fluffy\_moveaway\*t\_sedp\_1\*(1.0-cgt\_in\_sediment))\*  
lim\_t\_sedp\_1\_46

**relax alkalinity to default value to compensate for detritus removal [mol/kg/day]**

-> ohminus

p\_stf\_alk = theta(0.0024-t\_alk)\*0.01\*(0.0024-t\_alk)\*(1.0-  
cgt\_in\_sediment)\*theta(20.0-cgt\_bottomdepth)

**relax alkalinity to default value to compensate for detritus removal [mol/kg/day]**

ohminus ->

p\_stf\_alk\_up = theta(t\_alk-0.0024)\*0.01\*(t\_alk-0.0024)\*(1.0-  
cgt\_in\_sediment)\*theta(20.0-cgt\_bottomdepth)

## Auxiliary variables

## Constants

**rate with which fluffy layer is transported to deeper areas [1/d]**

r\_fluffy\_moveaway = 0.0

## Process limitation factors

lim\_t\_ips\_52 = theta(t\_ips-0.0)

lim\_t\_sed\_1\_22 = theta(t\_sed\_1-0.0)

lim\_t\_sed\_2\_23 = theta(t\_sed\_2-0.0)

lim\_t\_sed\_3\_24 = theta(t\_sed\_3-0.0)

lim\_t\_sed\_4\_25 = theta(t\_sed\_4-0.0)

lim\_t\_sed\_5\_26 = theta(t\_sed\_5-0.0)

lim\_t\_sed\_6\_27 = theta(t\_sed\_6-0.0)

lim\_t\_ihs\_53 = theta(t\_ihs-0.0)

lim\_t\_pyr\_58 = theta(t\_pyr-0.0)

continued on next page...

| Process limitation factors, continued from previous page |                     |
|----------------------------------------------------------|---------------------|
| lim_t_ims_57 =                                           | theta(t_ims-0.0)    |
| lim_t_mos_59 =                                           | theta(t_mos-0.0)    |
| lim_t_rho_60 =                                           | theta(t_rho-0.0)    |
| lim_t_iim_61 =                                           | theta(t_iim-0.0)    |
| lim_t_ihc_54 =                                           | theta(t_ihc-0.0)    |
| lim_t_sedp_1_46 =                                        | theta(t_sedp_1-0.0) |
| lim_t_sedp_2_47 =                                        | theta(t_sedp_2-0.0) |
| lim_t_sedp_3_48 =                                        | theta(t_sedp_3-0.0) |
| lim_t_sedp_4_49 =                                        | theta(t_sedp_4-0.0) |
| lim_t_sedp_5_50 =                                        | theta(t_sedp_5-0.0) |
| lim_t_sedp_6_51 =                                        | theta(t_sedp_6-0.0) |

### 3.11 Process type physics/adsorption

| Processes                                                                                                                                                                                                                                                                                                                                                                                                  |
|------------------------------------------------------------------------------------------------------------------------------------------------------------------------------------------------------------------------------------------------------------------------------------------------------------------------------------------------------------------------------------------------------------|
| <b>adsorption of phosphate to iron hydroxide particles (sediment only) [mol/m<sup>2</sup>/day]</b><br>$t_{po4} + t_{ihs} \rightarrow 3*ohminus + t_{ips}$<br>$p_{po4\_ads\_ips} = (k_{ips\_dissolution} * (t_{po4} - po4\_eq\_ips) * theta(t_{po4} - po4\_eq\_ips) * cgt\_cellheight * cgt\_density) * lim\_t_{po4\_15} * lim\_t_{ihs\_53}$                                                                |
| <b>dissolution of iron phosphate (sediment only) [mol/m<sup>2</sup>/day]</b><br>$3*ohminus + t_{ips} \rightarrow t_{po4} + t_{ihs}$<br>$p_{ips\_diss\_po4} = (k_{ips\_dissolution} * (po4\_eq\_ips - t_{po4}) * theta(po4\_eq\_ips - t_{po4}) * cgt\_cellheight * cgt\_density) * lim\_t_{ips\_52}$                                                                                                        |
| <b>adsorption of phosphate to iron hydroxide particles [mol/kg/day]</b><br>$t_{ihw} + t_{po4} \rightarrow t_{ipw} + 3*ohminus$<br>$p_{po4\_ads\_ipw} = (k_{ips\_dissolution} * (t_{po4} - po4\_eq\_ipw) * theta(t_{po4} - po4\_eq\_ipw) * (1.0 - cgt\_in\_sediment)) * lim\_t_{ihw\_44} * lim\_t_{po4\_15}$                                                                                                |
| <b>dissolution of iron phosphate [mol/kg/day]</b><br>$3*ohminus + t_{ipw} \rightarrow t_{po4} + t_{ihw}$<br>$p_{ipw\_diss\_po4} = (k_{ips\_dissolution} * (po4\_eq\_ipw - t_{po4}) * theta(po4\_eq\_ipw - t_{po4}) * (1.0 - cgt\_in\_sediment)) * lim\_t_{ipw\_43}$                                                                                                                                        |
| <b>phosphate adsorption to illite-montmorillonite mixed layer minerals (sediment only) [mol/m<sup>2</sup>/day]</b><br>$t_{po4} + 3*h3oplus \rightarrow t_{pim} + 3*h2o$<br>$p_{po4\_ads\_pim} = (cgt\_in\_sediment * min(t_{po4} * cgt\_cellheight * cgt\_density, max(0.0, pim\_eq - t_{pim})) * r_{po4\_ads\_pim}) * lim\_t_{po4\_15}$                                                                   |
| <b>phosphate liberation from illite-montmorillonite mixed layer minerals (sediment only) [mol/m<sup>2</sup>/day]</b><br>$t_{pim} + 3*h2o \rightarrow t_{po4} + 3*h3oplus$<br>$p_{pim\_lib\_po4} = (cgt\_in\_sediment * min(po4\_ads\_pim * cgt\_cellheight * cgt\_density, max(0.0, t_{pim} - pim\_eq)) * r_{po4\_ads\_pim} + (1.0 - cgt\_in\_sediment) * t_{pim} * r_{po4\_ads\_pim}) * lim\_t_{pim\_66}$ |
| <b>ammonium adsorption to illite-montmorillonite mixed layer minerals (sediment only) [mol/m<sup>2</sup>/day]</b><br>$ohminus + t_{nh4} \rightarrow h2o + t_{aim}$<br>$p_{nh4\_ads\_aim} = (cgt\_in\_sediment * min(t_{nh4} * cgt\_cellheight * cgt\_density, max(0.0, aim\_eq - t_{aim})) * r_{nh4\_ads\_aim}) * lim\_t_{nh4\_16}$                                                                        |
| continued on next page...                                                                                                                                                                                                                                                                                                                                                                                  |

## Processes, continued from previous page

**ammonium liberation from illite-montmorillonite mixed layer minerals (sediment only) [mol/m<sup>2</sup>/day]**

$\text{h2o} + \text{t\_aim} \rightarrow \text{ohminus} + \text{t\_nh4}$

$\text{p\_aim\_lib\_nh4} = (\text{cgt\_in\_sediment} * \min(\text{nh4\_ads\_aim} * \text{cgt\_cellheight} * \text{cgt\_density}, \max(0.0, \text{t\_aim} - \text{aim\_eq})) * \text{r\_nh4\_ads\_aim} + (1.0 - \text{cgt\_in\_sediment}) * \text{t\_aim} * \text{r\_nh4\_ads\_aim}) * \text{lim\_t\_aim\_67}$

**Auxiliary variables**

**absolute temperature [K]**

$\text{temp\_k} = \text{cgt\_temp} + 273.15$

**temporary value assumed for pH [1]**

$\text{ph\_temp} = 0.0 - \log(\min(\max(\text{h3o}, 1.0\text{e-}12), 1.0\text{e-}2)) / \log(10.0)$

calculated iteratively, 10 iterations, initial value = 0.0

**self-ionization constant of Water [mol<sup>2</sup>/kg<sup>2</sup>]**

$\text{k\_water} = \exp(-13847.26 / \text{temp\_k} + 148.96502 - 23.6521 * \log(\text{temp\_k}) + (118.67 / \text{temp\_k} - 5.977 + 1.0495 * \log(\text{temp\_k})) * \sqrt{\text{cgt\_sali}} - 0.01615 * \text{cgt\_sali})$

**Acid dissociation constant  $\text{CO}_2 + 2 \text{H}_2\text{O} \leftrightarrow \text{HCO}_3^- + \text{H}_3\text{O}^+$  [mol/kg]**

$\text{k1\_co2} = \text{power}(10.0, (-3633.86 / \text{temp\_k} + 61.2172 - 9.6777 * \log(\text{temp\_k}) + 0.011555 * \text{cgt\_sali} - 0.0001152 * \text{cgt\_sali} * \sqrt{\text{cgt\_sali}}))$

**Acid dissociation constant  $\text{HCO}_3^- + \text{H}_2\text{O} \leftrightarrow [\text{CO}_3^{2-}] + \text{H}_3\text{O}^+$  [mol/kg]**

$\text{k2\_co2} = \text{power}(10.0, (-471.78 / \text{temp\_k} - 25.929 + 3.16967 * \log(\text{temp\_k}) + 0.01781 * \text{cgt\_sali} - 0.0001122 * \text{cgt\_sali} * \sqrt{\text{cgt\_sali}}))$

**Acid dissociation constant of boric acid [mol/kg]**

$\text{k\_boron} = \exp((-8966.9 - 2890.53 * \sqrt{\text{cgt\_sali}} - 77.942 * \text{cgt\_sali} + 1.728 * \text{cgt\_sali} * \sqrt{\text{cgt\_sali}} - 0.0996 * \text{cgt\_sali} * \text{cgt\_sali}) / \text{temp\_k} + 148.0248 + 137.1942 * \sqrt{\text{cgt\_sali}} + 1.62142 * \text{cgt\_sali} + (-24.4344 - 25.085 * \sqrt{\text{cgt\_sali}} - 0.2474 * \text{cgt\_sali}) * \log(\text{temp\_k}) + 0.053105 * \sqrt{\text{cgt\_sali}} * \text{temp\_k})$

**Acid dissociation constant  $\text{H}_3\text{PO}_4 + \text{H}_2\text{O} \leftrightarrow [\text{H}_2\text{PO}_4^-] + \text{H}_3\text{O}^+$  [mol/kg]**

$\text{k1\_po4} = \exp(-4576.752 / \text{temp\_k} + 115.525 - 18.453 * \log(\text{temp\_k}) + (0.69171 - 106.736 / \text{temp\_k}) * \sqrt{\text{cgt\_sali}} - (0.01844 + 0.65643 / \text{temp\_k}) * \text{cgt\_sali})$

continued on next page...

## Auxiliary variables, continued from previous page

**Acid dissociation constant  $[H_2PO_4^-] + H_2O \rightleftharpoons [HPO_4^{2-}] + H_3O^+$  [mol/kg]**

$$k2\_po4 = \exp(-8814.715/temp\_k + 172.0883 - 27.927*\log(temp\_k) + (1.35660 - 160.340/temp\_k)*\sqrt{cgt\_sali} - (0.05778 - 0.37335/temp\_k)*cgt\_sali)$$

**Acid dissociation constant  $[HPO_4^{2-}] + H_2O \rightleftharpoons [PO_4^{3-}] + H_3O^+$  [mol/kg]**

$$k3\_po4 = \exp(-3070.75/temp\_k - 18.141 + (2.81197 + 17.27039/temp\_k)*\sqrt{cgt\_sali} - (0.09984 + 44.99486/temp\_k)*cgt\_sali)$$

**Acid dissociation constant  $H_2S + H_2O \rightleftharpoons HS^- + H_3O^+$  [mol/kg]**

$$k1\_h2s = \exp(-3131.42/temp\_k - 5.818 + 0.368*(\text{power}(\max(0.0, cgt\_sali), (1.0/3.0))))$$

**total concentration of boron [mol/kg]**

$$boron\_total = 0.000416 * cgt\_sali / 35.0$$

**boron alkalinity [mol/kg]**

$$alk\_boron = boron\_total * k\_boron / (k\_boron + h3o)$$

calculated iteratively, 10 iterations, initial value = 0.0

**hydrogen sulfide alkalinity [mol/kg]**

$$alk\_h2s = t\_h2s * k1\_h2s / (k1\_h2s + h3o)$$

calculated iteratively, 10 iterations, initial value = 0.0

**water alkalinity [mol/kg]**

$$alk\_water = k\_water / h3o - h3o$$

calculated iteratively, 10 iterations, initial value = 0.0

**denominator in phosphate alkalinity formula [mol<sup>3</sup>/kg<sup>3</sup>]**

$$alk\_po4\_denominator = (h3o*h3o*h3o + k1\_po4*h3o*h3o + k1\_po4*k2\_po4*h3o + k1\_po4*k2\_po4*k3\_po4)$$

calculated iteratively, 10 iterations, initial value = 0.0

**phosphate alkalinity [mol/kg]**

$$alk\_po4 = (t\_po4*(k1\_po4*k2\_po4*h3o + 2.0*k1\_po4*k2\_po4*k3\_po4 - h3o*h3o) / alk\_po4\_denominator)$$

calculated iteratively, 10 iterations, initial value = 0.0

**denominator in carbonate alkalinity formula [mol<sup>2</sup>/kg<sup>2</sup>]**

$$alk\_co2\_denominator = (h3o*h3o + k1\_co2*h3o + k1\_co2*k2\_co2)$$

calculated iteratively, 10 iterations, initial value = 0.0

continued on next page...



### Auxiliary variables, continued from previous page

#### carbonate alkalinity [mol/kg]

$\text{alk\_co2} = \text{t\_dic} * \text{k1\_co2} * (\text{h3o} + 2 * \text{k2\_co2}) / \text{alk\_co2\_denominator}$

calculated iteratively, 10 iterations, initial value = 0.0

#### error in total alkalinity calculation at the assumed pH [mol/kg]

$\text{alk\_residual} = \text{t\_alk} - \text{alk\_co2} - \text{alk\_po4} - \text{alk\_boron} - \text{alk\_h2s} - \text{alk\_water}$

calculated iteratively, 10 iterations, initial value = 0.0

#### derivative of phosphate alkalinity with respect to h3o [1]

$\text{dalkp\_dh3o} = \frac{\text{t\_po4} * (0.0 - \text{k1\_po4} * \text{h3o} * \text{h3o} * \text{h3o} * \text{h3o} - 4 * \text{k1\_po4} * \text{k2\_po4} * \text{h3o} * \text{h3o} * \text{h3o} - (\text{k1\_po4} * \text{k1\_po4} * \text{k2\_po4} + 9 * \text{k1\_po4} * \text{k2\_po4} * \text{k3\_po4}) * \text{h3o} * \text{h3o} - 4 * \text{k1\_po4} * \text{k1\_po4} * \text{k2\_po4} * \text{k3\_po4} * \text{h3o} - \text{k1\_po4} * \text{k1\_po4} * \text{k2\_po4} * \text{k2\_po4} * \text{k3\_po4})}{(\text{alk\_po4\_denominator} * \text{alk\_po4\_denominator})}$

calculated iteratively, 10 iterations, initial value = 0.0

#### derivative of carbonate alkalinity with respect to h3o [1]

$\text{dalkc\_dh3o} = \frac{\text{t\_dic} * (0.0 - \text{k1\_co2} * \text{h3o} * \text{h3o} - \text{k1\_co2} * \text{k1\_co2} * \text{k2\_co2} - 4 * \text{k1\_co2} * \text{k2\_co2} * \text{h3o})}{(\text{alk\_co2\_denominator} * \text{alk\_co2\_denominator})}$

calculated iteratively, 10 iterations, initial value = 0.0

#### derivative of residual\_alk with respect to pH [mol/kg]

$\text{dalkresidual\_dpH} = 0.0 - \log(10.0) * \text{h3o} * (\text{alk\_boron} / (\text{k\_boron} + \text{h3o}) + \text{alk\_h2s} / (\text{k1\_h2s} + \text{h3o}) + \text{k\_water} / (\text{h3o} * \text{h3o}) + 1 - \text{dalkp\_dh3o} - \text{dalkc\_dh3o})$

calculated iteratively, 10 iterations, initial value = 0.0

#### newly determined pH value [1]

$\text{temp1} = \text{alk\_residual} / \text{dalkresidual\_dpH}$

$\text{ph} = \text{ph\_temp} - \text{temp1} + \text{theta}(\text{abs}(\text{temp1}) - 1) * 0.5 * \text{temp1}$

calculated iteratively, 10 iterations, initial value = 0.0

#### h3o ion concentration [mol/kg]

$\text{h3o} = \text{power}(10.0, 0.0 - \max(1.0, \min(13.0, \text{ph})))$

calculated iteratively, 10 iterations, initial value = 1.0e-8

#### theoretical phosphate concentration in equilibrium with iron phosphate in the sediments [mol/kg]

$\text{po4\_eq\_ips} = \text{power}(\max(\text{t\_ips} / \max(\text{t\_ips} + \text{t\_ihs}, \text{epsilon}) / 0.201 - 1.483 + 0.157 * \text{pH}, 0.0), 2.0) / 1000.0$

#### theoretical phosphate concentration in equilibrium with iron phosphate in the water [mol/kg]

$\text{po4\_eq\_ipw} = \text{power}(\max(\text{t\_ipw} / \max(\text{t\_ipw} + \text{t\_ihw}, \text{epsilon}) / 0.201 - 1.483 + 0.157 * \text{pH}, 0.0), 2.0) / 1000.0$

continued on next page...

### Auxiliary variables, continued from previous page

**amount of phosphate that can be maximally adsorbed to illite-montmorillonite mixed-layer minerals [mol/m<sup>2</sup>]**

```
temp1 = 2.7 * max(vol_fraction_im*(1.0-POR),epsilon)
temp2 = temp1*p_content_im
temp3 = temp2/55.0
pim_max = temp3 * 1000 * cgt_cellheight*cgt_density
```

**pim in equilibrium with po4 concentration**

```
pim_eq = pim_max*min(1.0,t_po4/max(po4_ads_pim,epsilon))
```

**amount of phosphate that can be maximally adsorbed to illite-montmorillonite mixed-layer minerals [mol/m<sup>2</sup>]**

```
temp1 = 2.7 * max(vol_fraction_im*(1.0-POR),epsilon)
temp2 = temp1*n_content_im
temp3 = temp2/18.0
aim_max = temp3 * 1000 * cgt_cellheight*cgt_density
```

**aim in equilibrium with po4 concentration**

```
aim_eq = aim_max*min(1.0,t_nh4/max(nh4_ads_aim,epsilon))
```

### Constants

**no division by 0**

```
epsilon = 4.5E-17
```

**inverse timescale for dissolution of iron phosphate [1/d]**

```
k_ips_dissolution = 0.1
```

**porosity**

```
por = 0.77
```

**fraction of illite-montmorillonite mixed layer minerals on volume of all minerals [1]**

```
vol_fraction_im = 0.5
```

**mass fraction of phosphate that can be adsorbed/desorbed to illite-montmorillonite mixed layer minerals [1]**

```
p_content_im = 0.0002
```

**mass fraction of ammonium that can be adsorbed/desorbed to illite-montmorillonite mixed layer minerals [1]**

```
n_content_im = 0.0
```

**phosphate concentration when phosphate in illite-montmorillonite mixed layer minerals is fully adsorbed [mol/kg]**

```
po4_ads_pim = 3.0E-5
```

continued on next page...

| Constants, continued from previous page |  |
|-----------------------------------------|--|
|-----------------------------------------|--|

|                                                                                                                |  |
|----------------------------------------------------------------------------------------------------------------|--|
| ammonium concentration when ammonium in illite-montmorillonite mixed layer minerals is fully adsorbed [mol/kg] |  |
|----------------------------------------------------------------------------------------------------------------|--|

|               |        |
|---------------|--------|
| nh4_ads_aim = | 4.0E-5 |
|---------------|--------|

|                                                                         |  |
|-------------------------------------------------------------------------|--|
| rate of phosphate adsorption/desorption to illite-montmorillonite [1/d] |  |
|-------------------------------------------------------------------------|--|

|                 |     |
|-----------------|-----|
| r_po4_ads_pim = | 0.1 |
|-----------------|-----|

|                                                                                             |  |
|---------------------------------------------------------------------------------------------|--|
| rate of ammonium adsorption/desorption to illite-montmorillonite mixed-layer minerals [1/d] |  |
|---------------------------------------------------------------------------------------------|--|

|                 |     |
|-----------------|-----|
| r_nh4_ads_aim = | 0.1 |
|-----------------|-----|

| Process limitation factors |  |
|----------------------------|--|
|----------------------------|--|

|                |                  |
|----------------|------------------|
| lim_t_nh4_16 = | theta(t_nh4-0.0) |
|----------------|------------------|

|                |                  |
|----------------|------------------|
| lim_t_po4_15 = | theta(t_po4-0.0) |
|----------------|------------------|

|                |                  |
|----------------|------------------|
| lim_t_ips_52 = | theta(t_ips-0.0) |
|----------------|------------------|

|                |                  |
|----------------|------------------|
| lim_t_ipw_43 = | theta(t_ipw-0.0) |
|----------------|------------------|

|                |                  |
|----------------|------------------|
| lim_t_ihs_53 = | theta(t_ihs-0.0) |
|----------------|------------------|

|                |                  |
|----------------|------------------|
| lim_t_ihw_44 = | theta(t_ihw-0.0) |
|----------------|------------------|

|                |                  |
|----------------|------------------|
| lim_t_pim_66 = | theta(t_pim-0.0) |
|----------------|------------------|

|                |                  |
|----------------|------------------|
| lim_t_aim_67 = | theta(t_aim-0.0) |
|----------------|------------------|

### 3.12 Process type physics/erosion

| Processes                                                                                                                                                                                                                                                     |
|---------------------------------------------------------------------------------------------------------------------------------------------------------------------------------------------------------------------------------------------------------------|
| sedimentary detritus erosion (index 1 to 6) (sediment only) [mol/m <sup>2</sup> /day]<br>t_sed_1 -> t_det_1<br>p_sed_1_ero_det = (erosion_is_active*r_sed_ero*t_sed_1*(1.0-cgt_in_sediment))<br>*lim_t_sed_1_22                                               |
| sedimentary detritus erosion (index 1 to 6) (sediment only) [mol/m <sup>2</sup> /day]<br>t_sedp_1 -> t_detp_1<br>p_sedp_1_ero_detp = (erosion_is_active*r_sed_ero*t_sedp_1*(1.0-cgt_in_sediment))<br>)*lim_t_sedp_1_46                                        |
| erosion of iron PO4 (sediment only) [mol/m <sup>2</sup> /day]<br>t_ips -> t_ipw<br>p_ips_ero_ipw = (erosion_is_active*r_ips_ero*t_ips*(1.0-cgt_in_sediment))*<br>lim_t_ips_52                                                                                 |
| erosion of iron PO4 (sediment only) [mol/m <sup>2</sup> /day]<br>t_ihs -> t_ihw<br>p_ihs_ero_ihw = (erosion_is_active*r_ips_ero*t_ihs*(1.0-cgt_in_sediment))*<br>lim_t_ihs_53                                                                                 |
| erosion of larger-crystalline iron PO4 (sediment only) [mol/m <sup>2</sup> /day]<br>t_ihc -> t_ihw<br>p_ihc_ero_ihw = (erosion_is_active*r_ips_ero*t_ihc*(1.0-cgt_in_sediment))*<br>lim_t_ihc_54                                                              |
| resuspension of iron monosulfide (sediment only) [mol/m <sup>2</sup> /day]<br>t_ims + 2.25*h2o + 0.25*h3oplus + 0.125*t_so4 -> 1.125*t_h2s + t_ihw<br>p_ims_ero_ihw = (erosion_is_active*r_ips_ero*t_ihw*(1.0-cgt_in_sediment))*<br>lim_t_ims_57*lim_t_so4_28 |
| resuspension of pyrite (sediment only) [mol/m <sup>2</sup> /day]<br>t_pyr + 3.75*h2o -> 0.25*h3oplus + 1.875*t_h2s + 0.125*t_so4 + t_ihw<br>p_pyr_ero_ihw = (erosion_is_active*r_ips_ero*t_pyr*(1.0-cgt_in_sediment))*<br>lim_t_pyr_58                        |
| bio resuspension of manganese oxide (sediment only) [mol/m <sup>2</sup> /day]<br>t_mos -> t_mow<br>p_mos_ero_mow = (erosion_is_active*r_ips_ero*t_mos*(1.0-cgt_in_sediment))*<br>lim_t_mos_59                                                                 |
| bio resuspension of rhodochrosite (sediment only) [mol/m <sup>2</sup> /day]<br>0.25*t_so4 + 1.7*h3oplus + t_rho -> t_mow + 0.25*t_h2s + 2.3*h2o + 0.6*t_ca2 +<br>1.6*t_dic                                                                                    |
| continued on next page...                                                                                                                                                                                                                                     |

## Processes, continued from previous page

```
p_rho_ero_mow = (erosion_is_active*r_ips_ero*t_rho*(1.0-cgt_in_sediment))*
lim_t_so4_28*lim_t_rho_60
```

bio resuspension of iron in clay minerals (sediment only) [mol/m<sup>2</sup>/day]

```
0.125*t_so4 + 0.25*h2o + 0.25*h3oplus + t_iim -> t_ihw + 0.125*t_h2s
p_iim_ero_ihw = (erosion_is_active*r_ips_ero*t_iim*(1.0-cgt_in_sediment))*
lim_t_so4_28*lim_t_iim_61
```

## Auxiliary variables

switch (1=erosion, 0=no erosion) which depends on the combined bottom stress of currents and waves

```
erosion_is_active = theta(cgt_current_wave_stress - critical_stress)
```

## Constants

critical shear stress for sediment erosion [N/m<sup>2</sup>]

```
critical_stress = 0.016
```

erosion rate for iron PO<sub>4</sub> [1/day]

```
r_ips_ero = 6.0
```

maximum sediment detritus erosion rate [1/day]

```
r_sed_ero = 6.0
```

## Process limitation factors

```
lim_t_ips_52 = theta(t_ips-0.0)
```

```
lim_t_so4_28 = theta(t_so4-0.0)
```

```
lim_t_sed_1_22 = theta(t_sed_1-0.0)
```

```
lim_t_sed_2_23 = theta(t_sed_2-0.0)
```

```
lim_t_sed_3_24 = theta(t_sed_3-0.0)
```

```
lim_t_sed_4_25 = theta(t_sed_4-0.0)
```

```
lim_t_sed_5_26 = theta(t_sed_5-0.0)
```

```
lim_t_sed_6_27 = theta(t_sed_6-0.0)
```

```
lim_t_ihs_53 = theta(t_ihs-0.0)
```

```
lim_t_pyr_58 = theta(t_pyr-0.0)
```

continued on next page...

| Process limitation factors, continued from previous page |                     |
|----------------------------------------------------------|---------------------|
| lim_t_ims_57 =                                           | theta(t_ims-0.0)    |
| lim_t_mos_59 =                                           | theta(t_mos-0.0)    |
| lim_t_rho_60 =                                           | theta(t_rho-0.0)    |
| lim_t_iim_61 =                                           | theta(t_iim-0.0)    |
| lim_t_ihc_54 =                                           | theta(t_ihc-0.0)    |
| lim_t_sedp_1_46 =                                        | theta(t_sedp_1-0.0) |
| lim_t_sedp_2_47 =                                        | theta(t_sedp_2-0.0) |
| lim_t_sedp_3_48 =                                        | theta(t_sedp_3-0.0) |
| lim_t_sedp_4_49 =                                        | theta(t_sedp_4-0.0) |
| lim_t_sedp_5_50 =                                        | theta(t_sedp_5-0.0) |
| lim_t_sedp_6_51 =                                        | theta(t_sedp_6-0.0) |

### 3.13 Process type physics/parameterization\_deep\_burial

| Processes                                                                                                                                                                                                                                                                                                                                                                                                                                                                                                                                                               |                    |
|-------------------------------------------------------------------------------------------------------------------------------------------------------------------------------------------------------------------------------------------------------------------------------------------------------------------------------------------------------------------------------------------------------------------------------------------------------------------------------------------------------------------------------------------------------------------------|--------------------|
| <p>parameterization for recycling of sedimentary detritus to ammonium below the deepest sediment layer (sulfate reduction / methane formation) (index 1 to 6) (sediment only) [mol/m<sup>2</sup>/day]</p> <pre> t_sed_1 + rfr_pc_enrichment_det*3.3125*t_so4 + (1.0+rfr_pc_enrichment_det* 6.625)*h3oplus -&gt; rfr_si*t_sil + t_nh4 + rfr_pc_enrichment_det*rfr_c*t_dic + rfr_pc_enrichment_det*3.3125*t_h2s + (1.0+rfr_pc_enrichment_det*13.25)*h2o (t_sed_1*vel_remin_deep*24.0*3600.0/0.02*theta(k-21.0))* p_sed_1_sulfdeep_nh4lim_t_sed_1_22*lim_t_so4_28 = </pre> |                    |
| <p>parameterization for recycling of sedimentary detritus to ammonium below the deepest sediment layer (sulfate reduction / methane formation) (index 1 to 6) (sediment only) [mol/m<sup>2</sup>/day]</p> <pre> t_sedp_1 + 3*rfr_pc_enrichment_det*rfr_p*h2o -&gt; 3*rfr_pc_enrichment_det*rfr_p* h3oplus + rfr_pc_enrichment_det*rfr_p*t_po4 (t_sedp_1*vel_remin_deep*24.0*3600.0/0.02*theta(k-21.0))* p_sedp_1_sulfdeep_polim_t_sedp_1_46 = </pre>                                                                                                                    |                    |
| Auxiliary variables                                                                                                                                                                                                                                                                                                                                                                                                                                                                                                                                                     |                    |
| Constants                                                                                                                                                                                                                                                                                                                                                                                                                                                                                                                                                               |                    |
| redfield ratio C/N                                                                                                                                                                                                                                                                                                                                                                                                                                                                                                                                                      |                    |
| rfr_c =                                                                                                                                                                                                                                                                                                                                                                                                                                                                                                                                                                 | 6.625              |
| redfield ratio P/N                                                                                                                                                                                                                                                                                                                                                                                                                                                                                                                                                      |                    |
| rfr_p =                                                                                                                                                                                                                                                                                                                                                                                                                                                                                                                                                                 | 0.0625             |
| enrichment factor for P and C in detritus [1]                                                                                                                                                                                                                                                                                                                                                                                                                                                                                                                           |                    |
| rfr_pc_enrichment_de                                                                                                                                                                                                                                                                                                                                                                                                                                                                                                                                                    | 1.5                |
| average ratio Si/N [1]                                                                                                                                                                                                                                                                                                                                                                                                                                                                                                                                                  |                    |
| rfr_si =                                                                                                                                                                                                                                                                                                                                                                                                                                                                                                                                                                | 0.9375             |
| effective velocity of detritus mineralization in the deepest layer [m/s]                                                                                                                                                                                                                                                                                                                                                                                                                                                                                                |                    |
| vel_remin_deep =                                                                                                                                                                                                                                                                                                                                                                                                                                                                                                                                                        | 0.0                |
| Process limitation factors                                                                                                                                                                                                                                                                                                                                                                                                                                                                                                                                              |                    |
| lim_t_so4_28 =                                                                                                                                                                                                                                                                                                                                                                                                                                                                                                                                                          | theta(t_so4-0.0)   |
| lim_t_sed_1_22 =                                                                                                                                                                                                                                                                                                                                                                                                                                                                                                                                                        | theta(t_sed_1-0.0) |
| continued on next page...                                                                                                                                                                                                                                                                                                                                                                                                                                                                                                                                               |                    |

| Process limitation factors, continued from previous page |                     |
|----------------------------------------------------------|---------------------|
| lim_t_sed_2_23 =                                         | theta(t_sed_2-0.0)  |
| lim_t_sed_3_24 =                                         | theta(t_sed_3-0.0)  |
| lim_t_sed_4_25 =                                         | theta(t_sed_4-0.0)  |
| lim_t_sed_5_26 =                                         | theta(t_sed_5-0.0)  |
| lim_t_sed_6_27 =                                         | theta(t_sed_6-0.0)  |
| lim_t_sedp_1_46 =                                        | theta(t_sedp_1-0.0) |
| lim_t_sedp_2_47 =                                        | theta(t_sedp_2-0.0) |
| lim_t_sedp_3_48 =                                        | theta(t_sedp_3-0.0) |
| lim_t_sedp_4_49 =                                        | theta(t_sedp_4-0.0) |
| lim_t_sedp_5_50 =                                        | theta(t_sedp_5-0.0) |
| lim_t_sedp_6_51 =                                        | theta(t_sedp_6-0.0) |



### 3.14 Process type physics/parameterization\_diffusion

| Processes           |                                                                                                                                                                                                                                                                   |
|---------------------|-------------------------------------------------------------------------------------------------------------------------------------------------------------------------------------------------------------------------------------------------------------------|
| relax_ohm_quickdiff | tracer against actual OH- concentration [mol/kg/day]<br>-> t_ohm_quickdiff<br>$\text{theta}(\text{oh}-\text{t\_ohm\_quickdiff}) * (\text{oh}-\text{t\_ohm\_quickdiff}) / \text{cgt\_timestep}$<br>relax_ohm_quickdiff_<br>=                                       |
| relax_ohm_quickdiff | tracer against actual OH- concentration [mol/kg/day]<br>t_ohm_quickdiff -><br>$(\text{theta}(\text{t\_ohm\_quickdiff}-\text{oh}) * (\text{t\_ohm\_quickdiff}-\text{oh}) / \text{cgt\_timestep}) * \text{lim\_t\_ohm\_quickdiff\_63}$<br>relax_ohm_quickdiff_<br>= |
| relax_ohm_slowdiff  | tracer against actual OH- concentration [mol/kg/day]<br>-> t_ohm_slowdiff<br>$\text{theta}(\text{oh}-\text{t\_ohm\_slowdiff}) * (\text{oh}-\text{t\_ohm\_slowdiff}) / \text{cgt\_timestep}$<br>relax_ohm_slowdiff_u<br>=                                          |
| relax_ohm_slowdiff  | tracer against actual OH- concentration [mol/kg/day]<br>t_ohm_slowdiff -><br>$(\text{theta}(\text{t\_ohm\_slowdiff}-\text{oh}) * (\text{t\_ohm\_slowdiff}-\text{oh}) / \text{cgt\_timestep}) * \text{lim\_t\_ohm\_slowdiff\_64}$<br>relax_ohm_slowdiff_d<br>=     |
| p_alk_rise_ohmdiff  | rise of total alkalinity by quicker-than-assumed diffusion of OH- [mol/kg/day]<br>-> ohminus<br>$\text{theta}(\text{t\_ohm\_quickdiff}-\text{t\_ohm\_slowdiff}) * (\text{t\_ohm\_quickdiff}-\text{t\_ohm\_slowdiff}) / \text{cgt\_timestep}$<br>=                 |
| p_alk_fall_ohmdiff  | falling of total alkalinity by quicker-than-assumed diffusion of OH- [mol/kg/day]<br>-> h3oplus<br>$\text{theta}(\text{t\_ohm\_slowdiff}-\text{t\_ohm\_quickdiff}) * (\text{t\_ohm\_slowdiff}-\text{t\_ohm\_quickdiff}) / \text{cgt\_timestep}$<br>=              |

| Auxiliary variables                                        |                                                                                                                                                           |
|------------------------------------------------------------|-----------------------------------------------------------------------------------------------------------------------------------------------------------|
| <b>absolute temperature [K]</b>                            |                                                                                                                                                           |
| temp_k =                                                   | cgt_temp + 273.15                                                                                                                                         |
| <b>temporary value assumed for pH [1]</b>                  |                                                                                                                                                           |
| ph_temp =                                                  | 0.0-log(min(max(h3o,1.0e-12),1.0e-2))/log(10.0)                                                                                                           |
| calculated iteratively, 10 iterations, initial value = 0.0 |                                                                                                                                                           |
| <b>self-ionization constant of Water [mol2/kg2]</b>        |                                                                                                                                                           |
| k_water =                                                  | exp( -13847.26 / temp_k + 148.96502 - 23.6521 * log(temp_k)<br>+ (118.67/temp_k - 5.977 + 1.0495 * log(temp_k)) *<br>sqrt(cgt_sali) - 0.01615 * cgt_sali) |
| continued on next page...                                  |                                                                                                                                                           |

## Auxiliary variables, continued from previous page

**Acid dissociation constant  $\text{CO}_2 + 2 \text{H}_2\text{O} \rightleftharpoons \text{HCO}_3^- + \text{H}_3\text{O}^+$  [mol/kg]**

```
k1_co2 = power(10.0, ( -3633.86 / temp_k + 61.2172 - 9.6777 *
log(temp_k) + 0.011555 * cgt_sali - 0.0001152 * cgt_sali *
cgt_sali))
```

**Acid dissociation constant  $\text{HCO}_3^- + \text{H}_2\text{O} \rightleftharpoons [\text{CO}_3^{2-}] + \text{H}_3\text{O}^+$  [mol/kg]**

```
k2_co2 = power(10.0, ( -471.78 / temp_k - 25.929 + 3.16967 *
log(temp_k) + 0.01781 * cgt_sali - 0.0001122 * cgt_sali *
cgt_sali))
```

**Acid dissociation constant of boric acid [mol/kg]**

```
k_boron = exp(( -8966.9 - 2890.53*sqrt(cgt_sali) - 77.942*cgt_sali +
1.728*cgt_sali*sqrt(cgt_sali) - 0.0996*cgt_sali*cgt_sali) /
temp_k + 148.0248 + 137.1942*sqrt(cgt_sali) + 1.62142*
cgt_sali + (-24.4344 - 25.085*sqrt(cgt_sali) - 0.2474*
cgt_sali)*log(temp_k) + 0.053105*sqrt(cgt_sali)*temp_k )
```

**Acid dissociation constant  $\text{H}_3\text{PO}_4 + \text{H}_2\text{O} \rightleftharpoons [\text{H}_2\text{PO}_4^-] + \text{H}_3\text{O}^+$  [mol/kg]**

```
k1_po4 = exp( -4576.752/temp_k + 115.525 - 18.453*log(temp_k) +
(0.69171 - 106.736/temp_k)*sqrt(cgt_sali) - (0.01844 +
0.65643/temp_k)*cgt_sali )
```

**Acid dissociation constant  $[\text{H}_2\text{PO}_4^-] + \text{H}_2\text{O} \rightleftharpoons [\text{HPO}_4^{2-}] + \text{H}_3\text{O}^+$  [mol/kg]**

```
k2_po4 = exp( -8814.715/temp_k + 172.0883 - 27.927*log(temp_k) +
(1.35660 - 160.340/temp_k)*sqrt(cgt_sali) - (0.05778 -
0.37335/temp_k)*cgt_sali )
```

**Acid dissociation constant  $[\text{HPO}_4^{2-}] + \text{H}_2\text{O} \rightleftharpoons [\text{PO}_4^{3-}] + \text{H}_3\text{O}^+$  [mol/kg]**

```
k3_po4 = exp( -3070.75/temp_k - 18.141 + (2.81197 + 17.27039/temp_k)
*sqrt(cgt_sali) - (0.09984 + 44.99486/temp_k)*cgt_sali )
```

**Acid dissociation constant  $\text{H}_2\text{S} + \text{H}_2\text{O} \rightleftharpoons \text{HS}^- + \text{H}_3\text{O}^+$  [mol/kg]**

```
k1_h2s = exp( -3131.42/temp_k - 5.818 + 0.368*
(power(max(0.0, cgt_sali), (1.0/3.0))))
```

**total concentration of boron [mol/kg]**

```
boron_total = 0.000416 * cgt_sali/35.0
```

**boron alkalinity [mol/kg]**

```
alk_boron = boron_total * k_boron / (k_boron + h3o)
calculated iteratively, 10 iterations, initial value = 0.0
```

**hydrogen sulfide alkalinity [mol/kg]**

continued on next page...

### Auxiliary variables, continued from previous page

$\text{alk\_h2s} = \text{t\_h2s} * \text{k1\_h2s} / (\text{k1\_h2s} + \text{h3o})$   
 calculated iteratively, 10 iterations, initial value = 0.0

### water alkalinity [mol/kg]

$\text{alk\_water} = \text{k\_water} / \text{h3o} - \text{h3o}$   
 calculated iteratively, 10 iterations, initial value = 0.0

### denominator in phosphate alkalinity formula [mol3/kg3]

$\text{alk\_po4\_denominator} (\text{h3o} * \text{h3o} * \text{h3o} + \text{k1\_po4} * \text{h3o} * \text{h3o} + \text{k1\_po4} * \text{k2\_po4} * \text{h3o} + \text{k1\_po4} * \text{k2\_po4} * \text{k3\_po4})$   
 calculated iteratively, 10 iterations, initial value = 0.0

### phosphate alkalinity [mol/kg]

$\text{alk\_po4} = \text{t\_po4} * (\text{k1\_po4} * \text{k2\_po4} * \text{h3o} + 2.0 * \text{k1\_po4} * \text{k2\_po4} * \text{k3\_po4} - \text{h3o} * \text{h3o} * \text{h3o}) / \text{alk\_po4\_denominator}$   
 calculated iteratively, 10 iterations, initial value = 0.0

### denominator in carbonate alkalinity formula [mol2/kg2]

$\text{alk\_co2\_denominator} (\text{h3o} * \text{h3o} + \text{k1\_co2} * \text{h3o} + \text{k1\_co2} * \text{k2\_co2})$   
 calculated iteratively, 10 iterations, initial value = 0.0

### carbonate alkalinity [mol/kg]

$\text{alk\_co2} = \text{t\_dic} * \text{k1\_co2} * (\text{h3o} + 2 * \text{k2\_co2}) / \text{alk\_co2\_denominator}$   
 calculated iteratively, 10 iterations, initial value = 0.0

### error in total alkalinity calculation at the assumed pH [mol/kg]

$\text{alk\_residual} = \text{t\_alk} - \text{alk\_co2} - \text{alk\_po4} - \text{alk\_boron} - \text{alk\_h2s} - \text{alk\_water}$   
 calculated iteratively, 10 iterations, initial value = 0.0

### derivative of phosphate alkalinity with respect to h3o [1]

$\text{dalkp\_dh3o} = \text{t\_po4} * (0.0 - \text{k1\_po4} * \text{h3o} * \text{h3o} * \text{h3o} * \text{h3o} - 4 * \text{k1\_po4} * \text{k2\_po4} * \text{h3o} * \text{h3o} - \text{h3o} - (\text{k1\_po4} * \text{k1\_po4} * \text{k2\_po4} + 9 * \text{k1\_po4} * \text{k2\_po4} * \text{k3\_po4}) * \text{h3o} * \text{h3o} - 4 * \text{k1\_po4} * \text{k1\_po4} * \text{k2\_po4} * \text{k3\_po4} * \text{h3o} - \text{k1\_po4} * \text{k1\_po4} * \text{k2\_po4} * \text{k2\_po4} * \text{k3\_po4}) / (\text{alk\_po4\_denominator} * \text{alk\_po4\_denominator})$   
 calculated iteratively, 10 iterations, initial value = 0.0

### derivative of carbonate alkalinity with respect to h3o [1]

$\text{dalkc\_dh3o} = \text{t\_dic} * (0.0 - \text{k1\_co2} * \text{h3o} * \text{h3o} - \text{k1\_co2} * \text{k1\_co2} * \text{k2\_co2} - 4 * \text{k1\_co2} * \text{k2\_co2} * \text{h3o}) / (\text{alk\_co2\_denominator} * \text{alk\_co2\_denominator})$   
 calculated iteratively, 10 iterations, initial value = 0.0

### derivative of residual\_alk with respect to pH [mol/kg]

$\text{dalkresidual\_dpH} = 0.0 - \log(10.0) * \text{h3o} * (\text{alk\_boron} / (\text{k\_boron} + \text{h3o}) + \text{alk\_h2s} / (\text{k1\_h2s} + \text{h3o}) + \text{k\_water} / (\text{h3o} * \text{h3o}) + 1 - \text{dalkp\_dh3o} - \text{dalkc\_dh3o})$

continued on next page...

| Auxiliary variables, continued from previous page |
|---------------------------------------------------|
|---------------------------------------------------|

|                                                            |
|------------------------------------------------------------|
| calculated iteratively, 10 iterations, initial value = 0.0 |
|------------------------------------------------------------|

| newly determined pH value [1] |
|-------------------------------|
|-------------------------------|

|         |                               |
|---------|-------------------------------|
| temp1 = | alk_residual/dalkresidual_dpH |
|---------|-------------------------------|

|      |                                                   |
|------|---------------------------------------------------|
| ph = | ph_temp - temp1 + theta(abs(temp1) - 1)*0.5*temp1 |
|------|---------------------------------------------------|

|                                                            |
|------------------------------------------------------------|
| calculated iteratively, 10 iterations, initial value = 0.0 |
|------------------------------------------------------------|

| h3o ion concentration [mol/kg] |
|--------------------------------|
|--------------------------------|

|       |                                       |
|-------|---------------------------------------|
| h3o = | power(10.0,0.0-max(1.0,min(13.0,ph))) |
|-------|---------------------------------------|

|                                                               |
|---------------------------------------------------------------|
| calculated iteratively, 10 iterations, initial value = 1.0e-8 |
|---------------------------------------------------------------|

| h3o ion concentration [mol/kg] |
|--------------------------------|
|--------------------------------|

|      |                                                          |
|------|----------------------------------------------------------|
| oh = | power(10.0,log(k_water)/log(10.0)+max(1.0,min(13.0,ph))) |
|------|----------------------------------------------------------|

| Constants |
|-----------|
|-----------|

| Process limitation factors |
|----------------------------|
|----------------------------|

|  |                            |
|--|----------------------------|
|  | theta(t_ohm_quickdiff-0.0) |
|--|----------------------------|

|                      |  |
|----------------------|--|
| lim_t_ohm_quickdiff_ |  |
|----------------------|--|

|   |  |
|---|--|
| = |  |
|---|--|

|  |                           |
|--|---------------------------|
|  | theta(t_ohm_slowdiff-0.0) |
|--|---------------------------|

|                      |  |
|----------------------|--|
| lim_t_ohm_slowdiff_6 |  |
|----------------------|--|

|   |  |
|---|--|
| = |  |
|---|--|

### 3.15 Process type physics/parameterization\_lateral

| Processes                                                                                                                                                                                                                                                                                                                                               |
|---------------------------------------------------------------------------------------------------------------------------------------------------------------------------------------------------------------------------------------------------------------------------------------------------------------------------------------------------------|
| <p>surface flux of detritus (index 1 to 6) (sediment only) [mol/m<sup>2</sup>/day]</p> <p>-&gt; t_detp_1 + t_det_1</p> <p>p_stf_det_1 = <math>\text{frac\_det\_1} * \text{accrate\_det\_1} * 2.47\text{e-}4 * (1.0 - \text{cgt\_in\_sediment})</math></p>                                                                                               |
| <p>raise SO4 concentration in the water column to salinity-determined default value [mol/kg/day]</p> <p>-&gt; t_so4</p> <p>p_so4_relax_upwards <math>(0.077 * \text{sal\_for\_so4} / (32 + 4 * 16) - t_{\text{so4}}) * \text{theta}(0.077 * \text{sal\_for\_so4} / (32 + 4 * 16) - t_{\text{so4}}) * (1.0 - \text{cgt\_in\_sediment})</math></p>        |
| <p>lower SO4 concentration in the water column to salinity-determined default value [mol/kg/day]</p> <p>t_so4 -&gt;</p> <p><math>((t_{\text{so4}} - 0.077 * \text{sal\_for\_so4} / (32 + 4 * 16)) * \text{theta}(t_{\text{so4}} - 0.077 * \text{sal\_for\_so4} / (32 + 4 * 16)) * (1.0 - \text{cgt\_in\_sediment})) * \text{lim\_t\_so4\_28}</math></p> |
| <p>raise Ca2+ concentration in the water column to salinity-determined default value [mol/kg/day]</p> <p>-&gt; t_ca2</p> <p>p_ca2_relax_upwards <math>(0.0118 * \text{sal\_for\_so4} / (40.1) - t_{\text{ca2}}) * \text{theta}(0.0118 * \text{sal\_for\_so4} / (40.0) - t_{\text{ca2}}) * (1.0 - \text{cgt\_in\_sediment})</math></p>                   |
| <p>lower Ca2+ concentration in the water column to salinity-determined default value [mol/kg/day]</p> <p>t_ca2 -&gt;</p> <p><math>((t_{\text{ca2}} - 0.0118 * \text{sal\_for\_so4} / (40.1)) * \text{theta}(t_{\text{ca2}} - 0.0118 * \text{sal\_for\_so4} / (40.0)) * (1.0 - \text{cgt\_in\_sediment})) * \text{lim\_t\_ca2\_56}</math></p>            |
| <p>remove silicate in water column as it gets too much [mol/kg/day]</p> <p>t_sil -&gt;</p> <p>p_remove_silicate = <math>((t_{\text{sil}} - 1.0\text{e-}5) * 0.1 * (1.0 - \text{cgt\_in\_sediment}) * (20.0 - \text{cgt\_bottomdepth})) * \text{lim\_t\_sil\_65}</math></p>                                                                              |
| <p>iron hydroxide generation by internal sources (surface only) [mol/m<sup>2</sup>/day]</p> <p>-&gt; t_ihw</p> <p>p_stf_ihw_3d = <math>9.42\text{e-}5</math></p>                                                                                                                                                                                        |
| Auxiliary variables                                                                                                                                                                                                                                                                                                                                     |
| <p>salinity used for so4 calculation</p> <p>sal_for_so4 = <math>\text{cgt\_sali}</math></p>                                                                                                                                                                                                                                                             |
| <p>accumulation ratio of detritus [1]</p>                                                                                                                                                                                                                                                                                                               |
| continued on next page...                                                                                                                                                                                                                                                                                                                               |

| Auxiliary variables, continued from previous page                |                  |
|------------------------------------------------------------------|------------------|
| accrate_det_1 =                                                  | 0.0              |
| accumulation ratio of detritus [1]                               |                  |
| accrate_det_2 =                                                  | 0.0              |
| accumulation ratio of detritus [1]                               |                  |
| accrate_det_3 =                                                  | accratedet       |
| accumulation ratio of detritus [1]                               |                  |
| accrate_det_4 =                                                  | accratedet       |
| accumulation ratio of detritus [1]                               |                  |
| accrate_det_5 =                                                  | accratedet       |
| accumulation ratio of detritus [1]                               |                  |
| accrate_det_6 =                                                  | accratedet       |
| Constants                                                        |                  |
| fraction of this detritus class in total detritus production [1] |                  |
| frac_det_1 =                                                     | 0.26             |
| fraction of this detritus class in total detritus production [1] |                  |
| frac_det_2 =                                                     | 0.16             |
| fraction of this detritus class in total detritus production [1] |                  |
| frac_det_3 =                                                     | 0.16             |
| fraction of this detritus class in total detritus production [1] |                  |
| frac_det_4 =                                                     | 0.16             |
| fraction of this detritus class in total detritus production [1] |                  |
| frac_det_5 =                                                     | 0.08             |
| fraction of this detritus class in total detritus production [1] |                  |
| frac_det_6 =                                                     | 0.18             |
| accumulation ratio of detritus (import vs. local production) [1] |                  |
| accratedet =                                                     | 0.0              |
| Process limitation factors                                       |                  |
| lim_t_so4_28 =                                                   | theta(t_so4-0.0) |
| lim_t_ca2_56 =                                                   | theta(t_ca2-0.0) |
| lim_t_sil_65 =                                                   | theta(t_sil-0.0) |
| continued on next page...                                        |                  |

|                                                          |
|----------------------------------------------------------|
| Process limitation factors, continued from previous page |
|----------------------------------------------------------|



### 3.16 Process type physics/precipitation

| Processes                                                                                                                                                                                                                                                                                                                                                                                                                                                                                                                                                                                 |
|-------------------------------------------------------------------------------------------------------------------------------------------------------------------------------------------------------------------------------------------------------------------------------------------------------------------------------------------------------------------------------------------------------------------------------------------------------------------------------------------------------------------------------------------------------------------------------------------|
| <p><b>precipitation of iron II as siderite (sediment only) [mol/m<sup>2</sup>/day]</b></p> <p><math>t_{\text{fe2}} + t_{\text{h2s}} + 2.0 \cdot \text{ohminus} \rightarrow t_{\text{ims}} + 2.0 \cdot \text{h2o}</math></p> <p><math>p_{\text{fe2\_prec\_ims}} = (\text{fe2\_ims\_is\_smallest} \cdot \text{cgt\_in\_sediment} \cdot \text{theta}(t_{\text{fe2}} - \text{fe2\_smooth})) \cdot (t_{\text{fe2}} - \text{fe2\_smooth}) / \text{cgt\_timestep} \cdot \text{cgt\_cellheight} \cdot \text{cgt\_density} \cdot \text{lim\_t\_fe2\_55} \cdot \text{lim\_t\_h2s\_29}</math></p>    |
| <p><b>dissolution of magnetite to iron II (precipitating iron hydroxides) (sediment only) [mol/m<sup>2</sup>/day]</b></p> <p><math>2.0 \cdot \text{h3opplus} + t_{\text{ims}} \rightarrow 2.0 \cdot \text{h2o} + t_{\text{h2s}} + t_{\text{fe2}}</math></p> <p><math>p_{\text{ims\_diss\_fe2}} = (\text{fe2\_ims\_is\_smallest} \cdot \text{cgt\_in\_sediment} \cdot \text{theta}(\text{fe2\_smooth} - t_{\text{fe2}})) \cdot (\text{fe2\_smooth} - t_{\text{fe2}}) / \text{cgt\_timestep} \cdot \text{cgt\_cellheight} \cdot \text{cgt\_density} \cdot \text{lim\_t\_ims\_57}</math></p> |
| <p><b>precipitation of iron II as minnesotaite (sediment only) [mol/m<sup>2</sup>/day]</b></p> <p><math>2 \cdot \text{ohminus} + t_{\text{fe2}} \rightarrow t_{\text{iim}}</math></p> <p><math>p_{\text{fe2\_prec\_iim}} = (\text{fe2\_iim\_is\_smallest} \cdot \text{cgt\_in\_sediment} \cdot \text{theta}(t_{\text{fe2}} - \text{fe2\_smooth})) \cdot (t_{\text{fe2}} - \text{fe2\_smooth}) / \text{cgt\_timestep} \cdot \text{cgt\_cellheight} \cdot \text{cgt\_density} \cdot \text{lim\_t\_fe2\_55}</math></p>                                                                       |
| <p><b>dissolution minnesotaite to of iron-II (sediment only) [mol/m<sup>2</sup>/day]</b></p> <p><math>t_{\text{iim}} \rightarrow t_{\text{fe2}} + 2 \cdot \text{ohminus}</math></p> <p><math>p_{\text{iim\_diss\_fe2}} = (\text{fe2\_iim\_is\_smallest} \cdot \text{cgt\_in\_sediment} \cdot \text{theta}(\text{fe2\_smooth} - t_{\text{fe2}})) \cdot (\text{fe2\_smooth} - t_{\text{fe2}}) / \text{cgt\_timestep} \cdot \text{cgt\_cellheight} \cdot \text{cgt\_density} \cdot \text{lim\_t\_iim\_61}</math></p>                                                                         |
| <p><b>iron monosulfide transformation to minnesotaite (sediment only) [mol/m<sup>2</sup>/day]</b></p> <p><math>t_{\text{ims}} + 2 \cdot \text{h2o} \rightarrow t_{\text{iim}} + t_{\text{h2s}}</math></p> <p><math>p_{\text{ims\_trans\_iim}} = (\text{fe2\_iim\_is\_smallest} \cdot \text{theta}(\text{ims\_dissolution\_rate})) \cdot \text{ims\_dissolution\_rate} \cdot \text{lim\_t\_ims\_57}</math></p>                                                                                                                                                                             |
| <p><b>minnesotaite transformation to iron monosulfide (sediment only) [mol/m<sup>2</sup>/day]</b></p> <p><math>t_{\text{iim}} + t_{\text{h2s}} \rightarrow t_{\text{ims}} + 2 \cdot \text{h2o}</math></p> <p><math>p_{\text{iim\_trans\_ims}} = (\text{fe2\_ims\_is\_smallest} \cdot \text{theta}(\text{iim\_dissolution\_rate})) \cdot \text{iim\_dissolution\_rate} \cdot \text{lim\_t\_iim\_61} \cdot \text{lim\_t\_h2s\_29}</math></p>                                                                                                                                                |
| <p><b>rhodochrosite dissolution to manganese-II (sediment only) [mol/m<sup>2</sup>/day]</b></p> <p><math>t_{\text{rho}} + 3.2 \cdot \text{h3opplus} \rightarrow 4.8 \cdot \text{h2o} + 0.6 \cdot t_{\text{ca2}} + t_{\text{mn2}} + 1.6 \cdot t_{\text{dic}}</math></p> <p><math>p_{\text{rho\_diss\_mn2}} = (0.1 \cdot 1.0 \cdot 10^{-5} \cdot \text{theta}(1.0 - \text{saturation\_rhodochrosite})) \cdot \text{cgt\_in\_sediment} \cdot \text{cgt\_cellheight} \cdot \text{cgt\_density} \cdot \text{lim\_t\_rho\_60}</math></p>                                                        |
| <p><b>pyrite formation from iron monosulfide (sediment only) [mol/m<sup>2</sup>/day]</b></p> <p><math>0.5 \cdot \text{h3opplus} + 0.25 \cdot t_{\text{so4}} + 0.75 \cdot t_{\text{h2s}} + t_{\text{ims}} \rightarrow t_{\text{pyr}} + 1.5 \cdot \text{h2o}</math></p>                                                                                                                                                                                                                                                                                                                     |
| continued on next page...                                                                                                                                                                                                                                                                                                                                                                                                                                                                                                                                                                 |

| Processes, continued from previous page                                                                                                                                  |                                                                                                                                                                                                                                                                                                           |
|--------------------------------------------------------------------------------------------------------------------------------------------------------------------------|-----------------------------------------------------------------------------------------------------------------------------------------------------------------------------------------------------------------------------------------------------------------------------------------------------------|
| p_ims_form2_pyr =                                                                                                                                                        | (t_ims*t_h2s*k_pyrite)*lim_t_so4_28*lim_t_h2s_29*<br>lim_t_ims_57                                                                                                                                                                                                                                         |
| Auxiliary variables                                                                                                                                                      |                                                                                                                                                                                                                                                                                                           |
| <b>absolute temperature [K]</b>                                                                                                                                          |                                                                                                                                                                                                                                                                                                           |
| temp_k =                                                                                                                                                                 | cgt_temp + 273.15                                                                                                                                                                                                                                                                                         |
| <b>temporary value assumed for pH [1]</b>                                                                                                                                |                                                                                                                                                                                                                                                                                                           |
| ph_temp =                                                                                                                                                                | 0.0-log(min(max(h3o,1.0e-12),1.0e-2))/log(10.0)                                                                                                                                                                                                                                                           |
| calculated iteratively, 10 iterations, initial value = 0.0                                                                                                               |                                                                                                                                                                                                                                                                                                           |
| <b>self-ionization constant of Water [mol<sup>2</sup>/kg<sup>2</sup>]</b>                                                                                                |                                                                                                                                                                                                                                                                                                           |
| k_water =                                                                                                                                                                | exp( -13847.26 / temp_k + 148.96502 - 23.6521 * log(temp_k)<br>+ (118.67/temp_k - 5.977 + 1.0495 * log(temp_k)) *<br>sqrt(cgt_sali) - 0.01615 * cgt_sali)                                                                                                                                                 |
| <b>Solubility of CO<sub>2</sub> [mol/kg/Pa]</b>                                                                                                                          |                                                                                                                                                                                                                                                                                                           |
| k0_co2 =                                                                                                                                                                 | exp(9345.17 / temp_k - 60.2409 + 23.3585 * (log(temp_k) -<br>4.605170186) + cgt_sali*(0.023517 - 0.00023656 * temp_k +<br>0.00000047036 *temp_k*temp_k))/101325.0                                                                                                                                         |
| <b>Acid dissociation constant CO<sub>2</sub> + 2 H<sub>2</sub>O &lt;-&gt; HCO<sub>3</sub><sup>-</sup> + H<sub>3</sub>O<sup>+</sup> [mol/kg]</b>                          |                                                                                                                                                                                                                                                                                                           |
| k1_co2 =                                                                                                                                                                 | power(10.0,( -3633.86 / temp_k + 61.2172 - 9.6777 *<br>log(temp_k) + 0.011555 * cgt_sali - 0.0001152 * cgt_sali *<br>cgt_sali))                                                                                                                                                                           |
| <b>Acid dissociation constant HCO<sub>3</sub><sup>-</sup> + H<sub>2</sub>O &lt;-&gt; [CO<sub>3</sub><sup>2-</sup>] + H<sub>3</sub>O<sup>+</sup> [mol/kg]</b>             |                                                                                                                                                                                                                                                                                                           |
| k2_co2 =                                                                                                                                                                 | power(10.0,( -471.78 / temp_k - 25.929 + 3.16967 *<br>log(temp_k) + 0.01781 * cgt_sali - 0.0001122 * cgt_sali *<br>cgt_sali))                                                                                                                                                                             |
| <b>Acid dissociation constant of boric acid [mol/kg]</b>                                                                                                                 |                                                                                                                                                                                                                                                                                                           |
| k_boron =                                                                                                                                                                | exp(( -8966.9 - 2890.53*sqrt(cgt_sali) - 77.942*cgt_sali +<br>1.728*cgt_sali*sqrt(cgt_sali) - 0.0996*cgt_sali*cgt_sali) /<br>temp_k + 148.0248 + 137.1942*sqrt(cgt_sali) + 1.62142*<br>cgt_sali + (-24.4344 - 25.085*sqrt(cgt_sali) - 0.2474*<br>cgt_sali)*log(temp_k) + 0.053105*sqrt(cgt_sali)*temp_k ) |
| <b>Acid dissociation constant H<sub>3</sub>PO<sub>4</sub> + H<sub>2</sub>O &lt;-&gt; [H<sub>2</sub>PO<sub>4</sub><sup>-</sup>] + H<sub>3</sub>O<sup>+</sup> [mol/kg]</b> |                                                                                                                                                                                                                                                                                                           |
| k1_po4 =                                                                                                                                                                 | exp( -4576.752/temp_k + 115.525 - 18.453*log(temp_k) +<br>(0.69171 - 106.736/temp_k)*sqrt(cgt_sali) - (0.01844 +<br>0.65643/temp_k)*cgt_sali )                                                                                                                                                            |
| continued on next page...                                                                                                                                                |                                                                                                                                                                                                                                                                                                           |

## Auxiliary variables, continued from previous page

**Acid dissociation constant  $[H_2PO_4^-] + H_2O \rightleftharpoons [HPO_4^{2-}] + H_3O^+$  [mol/kg]**

$k2_{po4} = \exp(-8814.715/temp\_k + 172.0883 - 27.927*\log(temp\_k) + (1.35660 - 160.340/temp\_k)*\sqrt{cgt\_sali} - (0.05778 - 0.37335/temp\_k)*cgt\_sali)$

**Acid dissociation constant  $[HPO_4^{2-}] + H_2O \rightleftharpoons [PO_4^{3-}] + H_3O^+$  [mol/kg]**

$k3_{po4} = \exp(-3070.75/temp\_k - 18.141 + (2.81197 + 17.27039/temp\_k)*\sqrt{cgt\_sali} - (0.09984 + 44.99486/temp\_k)*cgt\_sali)$

**Acid dissociation constant  $H_2S + H_2O \rightleftharpoons HS^- + H_3O^+$  [mol/kg]**

$k1_{h2s} = \exp(-3131.42/temp\_k - 5.818 + 0.368*(power(max(0.0, cgt\_sali), (1.0/3.0))))$

**total concentration of boron [mol/kg]**

$boron\_total = 0.000416 * cgt\_sali / 35.0$

**boron alkalinity [mol/kg]**

$alk\_boron = boron\_total * k\_boron / (k\_boron + h3o)$

calculated iteratively, 10 iterations, initial value = 0.0

**hydrogen sulfide alkalinity [mol/kg]**

$alk\_h2s = t\_h2s * k1_{h2s} / (k1_{h2s} + h3o)$

calculated iteratively, 10 iterations, initial value = 0.0

**water alkalinity [mol/kg]**

$alk\_water = k\_water / h3o - h3o$

calculated iteratively, 10 iterations, initial value = 0.0

**denominator in phosphate alkalinity formula [mol<sup>3</sup>/kg<sup>3</sup>]**

$alk\_po4\_denominator = (h3o*h3o*h3o + k1_{po4}*h3o*h3o + k1_{po4}*k2_{po4}*h3o + k1_{po4}*k2_{po4}*k3_{po4})$

calculated iteratively, 10 iterations, initial value = 0.0

**phosphate alkalinity [mol/kg]**

$alk\_po4 = (t_{po4}*(k1_{po4}*k2_{po4}*h3o + 2.0*k1_{po4}*k2_{po4}*k3_{po4} - h3o*h3o) / alk\_po4\_denominator)$

calculated iteratively, 10 iterations, initial value = 0.0

**denominator in carbonate alkalinity formula [mol<sup>2</sup>/kg<sup>2</sup>]**

$alk\_co2\_denominator = (h3o*h3o + k1_{co2}*h3o + k1_{co2}*k2_{co2})$

calculated iteratively, 10 iterations, initial value = 0.0

continued on next page...

### Auxiliary variables, continued from previous page

#### carbonate alkalinity [mol/kg]

$\text{alk\_co2} = \text{t\_dic} * \text{k1\_co2} * (\text{h3o} + 2 * \text{k2\_co2}) / \text{alk\_co2\_denominator}$

calculated iteratively, 10 iterations, initial value = 0.0

#### error in total alkalinity calculation at the assumed pH [mol/kg]

$\text{alk\_residual} = \text{t\_alk} - \text{alk\_co2} - \text{alk\_po4} - \text{alk\_boron} - \text{alk\_h2s} - \text{alk\_water}$

calculated iteratively, 10 iterations, initial value = 0.0

#### derivative of phosphate alkalinity with respect to h3o [1]

$\text{dalkp\_dh3o} = \frac{\text{t\_po4} * (0.0 - \text{k1\_po4} * \text{h3o} * \text{h3o} * \text{h3o} * \text{h3o} - 4 * \text{k1\_po4} * \text{k2\_po4} * \text{h3o} * \text{h3o} * \text{h3o} - (\text{k1\_po4} * \text{k1\_po4} * \text{k2\_po4} + 9 * \text{k1\_po4} * \text{k2\_po4} * \text{k3\_po4}) * \text{h3o} * \text{h3o} - 4 * \text{k1\_po4} * \text{k1\_po4} * \text{k2\_po4} * \text{k3\_po4} * \text{h3o} - \text{k1\_po4} * \text{k1\_po4} * \text{k2\_po4} * \text{k2\_po4} * \text{k3\_po4})}{(\text{alk\_po4\_denominator} * \text{alk\_po4\_denominator})}$

calculated iteratively, 10 iterations, initial value = 0.0

#### derivative of carbonate alkalinity with respect to h3o [1]

$\text{dalkc\_dh3o} = \frac{\text{t\_dic} * (0.0 - \text{k1\_co2} * \text{h3o} * \text{h3o} - \text{k1\_co2} * \text{k1\_co2} * \text{k2\_co2} - 4 * \text{k1\_co2} * \text{k2\_co2} * \text{h3o})}{(\text{alk\_co2\_denominator} * \text{alk\_co2\_denominator})}$

calculated iteratively, 10 iterations, initial value = 0.0

#### derivative of residual\_alk with respect to pH [mol/kg]

$\text{dalkresidual\_dpH} = 0.0 - \log(10.0) * \text{h3o} * (\text{alk\_boron} / (\text{k\_boron} + \text{h3o}) + \text{alk\_h2s} / (\text{k1\_h2s} + \text{h3o}) + \text{k\_water} / (\text{h3o} * \text{h3o}) + 1 - \text{dalkp\_dh3o} - \text{dalkc\_dh3o})$

calculated iteratively, 10 iterations, initial value = 0.0

#### newly determined pH value [1]

$\text{temp1} = \text{alk\_residual} / \text{dalkresidual\_dpH}$

$\text{ph} = \text{ph\_temp} - \text{temp1} + \text{theta}(\text{abs}(\text{temp1}) - 1) * 0.5 * \text{temp1}$

calculated iteratively, 10 iterations, initial value = 0.0

#### h3o ion concentration [mol/kg]

$\text{h3o} = \text{power}(10.0, 0.0 - \max(1.0, \min(13.0, \text{ph})))$

calculated iteratively, 10 iterations, initial value = 1.0e-8

#### co2 partial pressure [Pa]

$\text{pco2} = \text{t\_dic} / \text{k0\_co2} / (1 + \text{k1\_co2} / \text{h3o} + \text{k1\_co2} * \text{k2\_co2} / \text{h3o} / \text{h3o})$

#### Acid dissociation constant $\text{H2S} + \text{H2O} \rightleftharpoons \text{HS}^- + \text{H3O}^+$ [mol/kg]

$\text{k1\_h2s\_sed} = \exp(-3131.42 / \text{temp\_k} - 5.818 + 0.368 * (\text{power}(\max(0.0, \text{cgt\_sali}), (1.0 / 3.0))))$

#### ionic strength of the solution [mol/kg]

$\text{ionic\_strength} = 0.02 * \text{cgt\_sali}$

continued on next page...

### Auxiliary variables, continued from previous page

#### dielectric constant of seawater [F/m]

```
temp1 = cgt_sali*(1.707e-2+1.205e-5*cgt_sali+4.058e-9*
power(cgt_sali,2.0))
temp2 = 1.0-0.2551*temp1+5.151e-2*temp1*temp1-6.889e-3*temp1*temp1*
temp1
temp3 = 87.74-0.40008*temp_k+9.398e-4*temp_k*temp_k+1.401e-6*
temp_k*temp_k*temp_k
dielectric_constant temp2*temp3
=
```

#### CO2 concentration in the surface layer [mol/kg]

```
co2 = pco2*k0_co2
```

#### concentration of HS- ions [mol/kg]

```
hsminus = t_h2s * k1_h2s_sed / (k1_h2s_sed + h3o)
```

#### parameter A for the Davies formula [mol<sup>0.5</sup> l<sup>-0.5</sup>]

```
davies_parameter_a 1.82e6*power(dielectric_constant*temp_k,-1.5)
=
```

#### concentration of HCO3- ions

```
hco3minus = co2*k1_co2/h3o
```

#### activity to concentration ratio of ions with a charge of +1/-1 [1]

```
power(10.0,0.0-davies_parameter_a*1*(sqrt(ionic_strength)
activity_coefficient/(1+sqrt(ionic_strength))-0.3*ionic_strength))
=
```

#### activity to concentration ratio of ions with a charge of +2/-2 [1]

```
power(10.0,0.0-davies_parameter_a*2*(sqrt(ionic_strength)
activity_coefficient/(1+sqrt(ionic_strength))-0.3*ionic_strength))
=
```

#### concentration of CO3-- ions

```
co32minus = hco3minus*k2_co2/h3o
```

#### activity of H3O+ ions (concentration corrected by ionic strength) [mol/kg]

```
activity_h3oplus = h3o*activity_coefficient_1
```

#### activity of CO3-- ions (concentration corrected by ionic strength) [mol/kg]

```
activity_co32minus co32minus*activity_coefficient_2
=
```

#### relative saturation of iron monosulfide [1]

```
saturation_ims = t_fe2*activity_coefficient_2*hsminus*
activity_coefficient_1/activity_h3oplus/power(10.0,-2.95)
```

continued on next page...

## Auxiliary variables, continued from previous page

**relative saturation of rhodochrosite [1]**

```

      t_mn2*activity_coefficient_2*
saturation_rhodochroactivity_co32minus/power(10.0,-9.5)
=

```

**relative saturation of iron-II to be adsorbed on illite-montmorillonite mixed-layer minerals [1]**

```

temp1 =      2.7 * max(vol_fraction_im*(1.0-POR),epsilon)
saturation_iim = t_fe2/((max(t_iim,epsilon)/cgt_cellheight/cgt_density)
                    /(100*temp1))

```

**dissolution rate of iron monosulfide [mol/m2/d]**

```

      r_ims_diss*theta(1.0-saturation_ims)*(1.0-saturation_ims)*
ims_dissolution_ratecgt_cellheight*cgt_density
=

```

**desorption rate of iron adsorbed to illite-minnesotaite mixed-layer minerals [mol/m2/d]**

```

      r_iim_diss*theta(1.0-saturation_iim)*(1.0-saturation_iim)*
iim_dissolution_ratecgt_cellheight*cgt_density
=

```

**Fe-II concentration in equilibrium with iron monosulfide precipitation [mol/kg]**

```

fe2_eq_ims =      power(10.0,-2.95)*activity_h3oplus/max(hsminus*
                    activity_coefficient_1,1.0e-3*epsilon)
                    /activity_coefficient_2

```

**Fe-II concentration in equilibrium with iron adsorbed to illite-montmorillonite mixed layer minerals [mol/kg]**

```

temp1 =      2.7 * max(vol_fraction_im*(1.0-POR),epsilon)
fe2_eq_iim =      (max(t_iim,epsilon)/cgt_cellheight/cgt_density)/(100*temp1)
                    +1000*(1.0-cgt_in_sediment)

```

**siderite is the favoured species for precipitation (0 or 1) [1]**

```

fe2_ims_is_smallest theta(fe2_eq_iim-fe2_eq_ims)
=

```

**minnesotaite is the favoured species for precipitation (0 or 1) [1]**

```

fe2_iim_is_smallest theta(fe2_eq_ims-fe2_eq_iim)
=

```

**Fe-II concentration in equilibrium with the fastest precipitating Fe species**

```

fe2_eq =      fe2_ims_is_smallest*fe2_eq_ims+fe2_iim_is_smallest*
                    fe2_eq_iim

```

continued on next page...

| Auxiliary variables, continued from previous page                                             |                  |
|-----------------------------------------------------------------------------------------------|------------------|
| <b>smoother value for fe2_eq [mol/kg]</b>                                                     |                  |
| temp1 =                                                                                       | 3.0e-6           |
| fe2_smooth =                                                                                  | fe2_eq           |
| Constants                                                                                     |                  |
| <b>no division by 0</b>                                                                       |                  |
| epsilon =                                                                                     | 4.5E-17          |
| <b>rate constant for formation of pyrite [kg/mol/d]</b>                                       |                  |
| k_pyrite =                                                                                    | 8.9              |
| <b>porosity</b>                                                                               |                  |
| por =                                                                                         | 0.77             |
| <b>fraction of illite-montmorillonite mixed layer minerals on volume of all minerals [1]</b>  |                  |
| vol_fraction_im =                                                                             | 0.5              |
| <b>rate of iron monosulfide dissolution [1/d]</b>                                             |                  |
| r_ims_diss =                                                                                  | 0.001            |
| <b>dissolution rate of iron adsorbed to illite-montmorillonite mixed-layer minerals [1/d]</b> |                  |
| r_iim_diss =                                                                                  | 0.001            |
| Process limitation factors                                                                    |                  |
| lim_t_h2s_29 =                                                                                | theta(t_h2s-0.0) |
| lim_t_so4_28 =                                                                                | theta(t_so4-0.0) |
| lim_t_fe2_55 =                                                                                | theta(t_fe2-0.0) |
| lim_t_ims_57 =                                                                                | theta(t_ims-0.0) |
| lim_t_rho_60 =                                                                                | theta(t_rho-0.0) |
| lim_t_iim_61 =                                                                                | theta(t_iim-0.0) |

| Processes                                                                                          |                                                                                                                                                                           |
|----------------------------------------------------------------------------------------------------|---------------------------------------------------------------------------------------------------------------------------------------------------------------------------|
| detritus sedimentation (index 1 to 6) (sediment only) [mol/m <sup>2</sup> /day]                    |                                                                                                                                                                           |
| t_det_1 -> t_sed_1                                                                                 |                                                                                                                                                                           |
| p_det_1_sedi_sed =                                                                                 | ((1.0-erosion_is_active)*(0.0-w_det_sedi)*t_det_1*<br>cgt_density*(1.0-cgt_in_sediment) + cgt_in_sediment*<br>(t_det_1*cgt_density*cgt_cellheight*0.1))*lim_t_det_1_31    |
| detritus sedimentation (index 1 to 6) (sediment only) [mol/m <sup>2</sup> /day]                    |                                                                                                                                                                           |
| t_detp_1 -> t_sedp_1                                                                               |                                                                                                                                                                           |
| p_detp_1_sedi_sedp =                                                                               | ((1.0-erosion_is_active)*(0.0-w_det_sedi)*t_detp_1*<br>cgt_density*(1.0-cgt_in_sediment) + cgt_in_sediment*<br>(t_detp_1*cgt_density*cgt_cellheight*0.1))*lim_t_detp_1_37 |
| sedimentation of iron PO4 (sediment only) [mol/m <sup>2</sup> /day]                                |                                                                                                                                                                           |
| t_ipw -> t_ips                                                                                     |                                                                                                                                                                           |
| p_ipw_sedi_ips =                                                                                   | ((1.0-erosion_is_active)*(0.0-w_ipw_sedi)*t_ipw*<br>cgt_density*(1.0-cgt_in_sediment))*lim_t_ipw_43                                                                       |
| sedimentation of iron hydroxide (sediment only) [mol/m <sup>2</sup> /day]                          |                                                                                                                                                                           |
| t_ihw -> t_ihs                                                                                     |                                                                                                                                                                           |
| p_ihw_sedi_ihs =                                                                                   | ((1.0-erosion_is_active)*(0.0-w_ipw_sedi)*t_ihw*<br>cgt_density*(1.0-cgt_in_sediment))*lim_t_ihw_44                                                                       |
| sedimentation of iron hydroxide (sediment only) [mol/m <sup>2</sup> /day]                          |                                                                                                                                                                           |
| t_mow -> t_mos                                                                                     |                                                                                                                                                                           |
| p_mow_sedi_mos =                                                                                   | ((1.0-erosion_is_active)*(0.0-w_ipw_sedi)*t_mow*<br>cgt_density*(1.0-cgt_in_sediment))*lim_t_mow_45                                                                       |
| Auxiliary variables                                                                                |                                                                                                                                                                           |
| switch (1=erosion, 0=no erosion) which depends on the combined bottom stress of currents and waves |                                                                                                                                                                           |
| erosion_is_active = theta(cgt_current_wave_stress - critical_stress)                               |                                                                                                                                                                           |
| Constants                                                                                          |                                                                                                                                                                           |
| critical shear stress for sediment erosion [N/m <sup>2</sup> ]                                     |                                                                                                                                                                           |
| critical_stress =                                                                                  | 0.016                                                                                                                                                                     |
| sedimentation velocity (negative for downward) [m/day]                                             |                                                                                                                                                                           |
| w_det_sedi =                                                                                       | -0.5                                                                                                                                                                      |
| sedimentation velocity for iron PO4 [m/day]                                                        |                                                                                                                                                                           |
| w_ipw_sedi =                                                                                       | -0.5                                                                                                                                                                      |



| Process limitation factors |                     |
|----------------------------|---------------------|
| lim_t_ipw_43 =             | theta(t_ipw-0.0)    |
| lim_t_det_1_31 =           | theta(t_det_1-0.0)  |
| lim_t_det_2_32 =           | theta(t_det_2-0.0)  |
| lim_t_det_3_33 =           | theta(t_det_3-0.0)  |
| lim_t_det_4_34 =           | theta(t_det_4-0.0)  |
| lim_t_det_5_35 =           | theta(t_det_5-0.0)  |
| lim_t_det_6_36 =           | theta(t_det_6-0.0)  |
| lim_t_ihw_44 =             | theta(t_ihw-0.0)    |
| lim_t_mow_45 =             | theta(t_mow-0.0)    |
| lim_t_detp_1_37 =          | theta(t_detp_1-0.0) |
| lim_t_detp_2_38 =          | theta(t_detp_2-0.0) |
| lim_t_detp_3_39 =          | theta(t_detp_3-0.0) |
| lim_t_detp_4_40 =          | theta(t_detp_4-0.0) |
| lim_t_detp_5_41 =          | theta(t_detp_5-0.0) |
| lim_t_detp_6_42 =          | theta(t_detp_6-0.0) |

3.18 Process type standard

|                            |
|----------------------------|
| Processes                  |
| Auxiliary variables        |
| Constants                  |
| Process limitation factors |

## 4 Tracer equations

### Tracer equations

#### Change of: autochthonous dissolved organic nitrogen

$$\begin{aligned} \frac{d}{dt} t_{\text{don}} = & \\ & + (p_{\text{lpp\_resp\_nh4}}) * \text{respiration of large-cell phytoplankton} \\ & \quad (\text{don\_fraction}) \\ & + (p_{\text{spp\_resp\_nh4}}) * \text{respiration of small-cell phytoplankton} \\ & \quad (\text{don\_fraction}) \\ & + (p_{\text{cya\_resp\_nh4}}) * \text{respiration of diazotroph cyanobacteria} \\ & \quad (\text{don\_fraction}) \\ & + (p_{\text{zoo\_resp\_nh4}}) * \text{respiration of zooplankton} \\ & \quad (\text{don\_fraction}) \\ & - p_{\text{don\_rec\_nh4}} \quad \text{mineralization of DON} \end{aligned}$$

#### Change of: dissolved molecular nitrogen

$$\begin{aligned} \frac{d}{dt} t_{\text{n2}} = & \\ & + \text{downward nitrogen flux through the surface} \\ & \quad p_{\text{n2\_stf\_down}} / (\text{cgt\_cellheight} * \\ & \quad \text{cgt\_density}) \\ & + (p_{\text{sed\_1\_denit\_nh4}}) * \text{recycling of sedimentary detritus to ammonium} \\ & \quad (\text{rfr\_pc\_enrichment\_det} * 2.65) \text{ using nitrate (denitrification)} \\ & \quad / (\text{cgt\_cellheight} * \text{cgt\_density}) \\ & + (p_{\text{sed\_2\_denit\_nh4}}) * \text{recycling of sedimentary detritus to ammonium} \\ & \quad (\text{rfr\_pc\_enrichment\_det} * 2.65) \text{ using nitrate (denitrification)} \\ & \quad / (\text{cgt\_cellheight} * \text{cgt\_density}) \\ & + (p_{\text{sed\_3\_denit\_nh4}}) * \text{recycling of sedimentary detritus to ammonium} \\ & \quad (\text{rfr\_pc\_enrichment\_det} * 2.65) \text{ using nitrate (denitrification)} \\ & \quad / (\text{cgt\_cellheight} * \text{cgt\_density}) \\ & + (p_{\text{sed\_4\_denit\_nh4}}) * \text{recycling of sedimentary detritus to ammonium} \\ & \quad (\text{rfr\_pc\_enrichment\_det} * 2.65) \text{ using nitrate (denitrification)} \\ & \quad / (\text{cgt\_cellheight} * \text{cgt\_density}) \end{aligned}$$

continued on next page...

## Tracer equations, continued from previous page

|                                                                                         |                                                                                  |
|-----------------------------------------------------------------------------------------|----------------------------------------------------------------------------------|
| + (p_sed_5_denit_nh4)*<br>(rfr_pc_enrichment_det*2.65)<br>/(cgt_cellheight*cgt_density) | recycling of sedimentary detritus to ammonium<br>using nitrate (denitrification) |
| + (p_sed_6_denit_nh4)*<br>(rfr_pc_enrichment_det*2.65)<br>/(cgt_cellheight*cgt_density) | recycling of sedimentary detritus to ammonium<br>using nitrate (denitrification) |
| + (p_h2s_oxno3_sul)*(0.2)                                                               | oxidation of hydrogen sulfide with nitrate                                       |
| + (p_sul_oxno3_so4)*(0.6)                                                               | oxidation of elemental sulfur with nitrate                                       |
| + (p_det_1_denit_nh4)*<br>(rfr_pc_enrichment_det*2.65)                                  | recycling of detritus to ammonium using<br>nitrate (denitrification)             |
| + (p_det_2_denit_nh4)*<br>(rfr_pc_enrichment_det*2.65)                                  | recycling of detritus to ammonium using<br>nitrate (denitrification)             |
| + (p_det_3_denit_nh4)*<br>(rfr_pc_enrichment_det*2.65)                                  | recycling of detritus to ammonium using<br>nitrate (denitrification)             |
| + (p_det_4_denit_nh4)*<br>(rfr_pc_enrichment_det*2.65)                                  | recycling of detritus to ammonium using<br>nitrate (denitrification)             |
| + (p_det_5_denit_nh4)*<br>(rfr_pc_enrichment_det*2.65)                                  | recycling of detritus to ammonium using<br>nitrate (denitrification)             |
| + (p_det_6_denit_nh4)*<br>(rfr_pc_enrichment_det*2.65)                                  | recycling of detritus to ammonium using<br>nitrate (denitrification)             |
| + (p_poc_denit)*(0.4)                                                                   | recycling of POC using nitrate (denitrification)                                 |
| -<br>p_n2_stf_up/(cgt_cellheight*<br>cgt_density)                                       | upward nitrogen flux through the surface                                         |
| - (p_n2_assim_cya)*(0.5)                                                                | fixation of dinitrogen by diazotroph<br>cyanobacteria                            |

## Change of: dissolved molecular oxygen

$$\frac{d}{dt} t_{o2} =$$

|                                                |                                          |
|------------------------------------------------|------------------------------------------|
| +                                              | downward oxygen flux through the surface |
| p_o2_stf_down/(cgt_cellheight*<br>cgt_density) |                                          |

continued on next page...

## Tracer equations, continued from previous page

|                                                                                         |                                                                          |
|-----------------------------------------------------------------------------------------|--------------------------------------------------------------------------|
| + (p_no3_assim_lpp)*(8.625)                                                             | assimilation of nitrate by large-cell phytoplankton                      |
| + (p_nh4_assim_lpp)*(6.625)                                                             | assimilation of ammonium by large-cell phytoplankton                     |
| + (p_no3_assim_spp)*(8.625)                                                             | assimilation of nitrate by small-cell phytoplankton                      |
| + (p_nh4_assim_spp)*(6.625)                                                             | assimilation of ammonium by small-cell phytoplankton                     |
| + (p_n2_assim_cya)*(7.375)                                                              | fixation of dinitrogen by diazotroph cyanobacteria                       |
| + p_assim_lpp_poc                                                                       | Production of POC by LPP                                                 |
| + p_assim_spp_poc                                                                       | Production of POC by SPP                                                 |
| + p_assim_cya_poc                                                                       | Production of POC by CYA                                                 |
| -<br>p_o2_stf_up/(cgt_cellheight*<br>cgt_density)                                       | upward oxygen flux through the surface                                   |
| - (p_lpp_resp_nh4)*(6.625)                                                              | respiration of large-cell phytoplankton                                  |
| - (p_spp_resp_nh4)*(6.625)                                                              | respiration of small-cell phytoplankton                                  |
| - (p_cya_resp_nh4)*(6.625)                                                              | respiration of diazotroph cyanobacteria                                  |
| - (p_zoo_resp_nh4)*(6.625)                                                              | respiration of zooplankton                                               |
| - (p_nh4_nit_no3)*(2)                                                                   | nitrification                                                            |
| - (p_nh4_nit_no3_sed)*(2)                                                               | nitrification in the sediment                                            |
| - (p_sed_1_resp_nh4)*<br>(rfr_pc_enrichment_det*6.625)<br>/(cgt_cellheight*cgt_density) | recycling of sedimentary detritus to ammonium using oxygen (respiration) |
| - (p_sed_2_resp_nh4)*<br>(rfr_pc_enrichment_det*6.625)<br>/(cgt_cellheight*cgt_density) | recycling of sedimentary detritus to ammonium using oxygen (respiration) |

continued on next page...

## Tracer equations, continued from previous page

- (p\_sed\_3\_resp\_nh4)\* recycling of sedimentary detritus to ammonium  
(rfr\_pc\_enrichment\_det\*6.625) using oxygen (respiration)  
/(cgt\_cellheight\*cgt\_density)
- (p\_sed\_4\_resp\_nh4)\* recycling of sedimentary detritus to ammonium  
(rfr\_pc\_enrichment\_det\*6.625) using oxygen (respiration)  
/(cgt\_cellheight\*cgt\_density)
- (p\_sed\_5\_resp\_nh4)\* recycling of sedimentary detritus to ammonium  
(rfr\_pc\_enrichment\_det\*6.625) using oxygen (respiration)  
/(cgt\_cellheight\*cgt\_density)
- (p\_sed\_6\_resp\_nh4)\* recycling of sedimentary detritus to ammonium  
(rfr\_pc\_enrichment\_det\*6.625) using oxygen (respiration)  
/(cgt\_cellheight\*cgt\_density)
- (p\_h2s\_oxo2\_sul)\*(0.5) oxidation of hydrogen sulfide with oxygen
- (p\_sul\_oxo2\_so4)\*(1.5) oxidation of elemental sulfur with oxygen
- (p\_det\_1\_resp\_nh4)\* recycling of detritus to ammonium using  
(rfr\_pc\_enrichment\_det\*6.625) oxygen (respiration)
- (p\_det\_2\_resp\_nh4)\* recycling of detritus to ammonium using  
(rfr\_pc\_enrichment\_det\*6.625) oxygen (respiration)
- (p\_det\_3\_resp\_nh4)\* recycling of detritus to ammonium using  
(rfr\_pc\_enrichment\_det\*6.625) oxygen (respiration)
- (p\_det\_4\_resp\_nh4)\* recycling of detritus to ammonium using  
(rfr\_pc\_enrichment\_det\*6.625) oxygen (respiration)
- (p\_det\_5\_resp\_nh4)\* recycling of detritus to ammonium using  
(rfr\_pc\_enrichment\_det\*6.625) oxygen (respiration)
- (p\_det\_6\_resp\_nh4)\* recycling of detritus to ammonium using  
(rfr\_pc\_enrichment\_det\*6.625) oxygen (respiration)
- (p\_fe2\_ox\_ihs)\*(0.25) oxidation of Fe2+ to iron hydroxide in the  
/(cgt\_cellheight\*cgt\_density) sediment
- (p\_fe2\_ox\_ihw)\*(0.25) oxidation of Fe2+ to iron hydroxide in the  
sediment

continued on next page...

## Tracer equations, continued from previous page

- $(p\_mn2\_ox\_mos)*(0.5) / (cgt\_cellheight*cgt\_density)$       oxidation of Mn<sup>2+</sup> to manganese oxide in the sediment
- $(p\_pyr\_oxo2\_ihs)*(0.25) / (cgt\_cellheight*cgt\_density)$       oxidation of pyrite by manganese oxide to iron oxyhydroxide
- $(p\_imm\_oxo2\_ihs)*(0.25) / (cgt\_cellheight*cgt\_density)$       oxidation of minnesotaite by oxygen to iron oxyhydroxide
- $(p\_i2i\_oxo2\_i3i)*(0.25) / (cgt\_cellheight*cgt\_density)$       oxidation of iron-II in illite-montmorillonite mixed layer minerals to iron-III
- $(p\_aim\_nit\_no3\_sed)*(2) / (cgt\_cellheight*cgt\_density)$       nitrification in the sediment
- $(p\_ims\_oxo2\_ihs)*(2.25) / (cgt\_cellheight*cgt\_density)$       iron monosulfide oxidation to iron oxihydroxides
- $p\_poc\_resp$       respiration of POC

## Change of: dissolved inorganic carbon

$$\frac{d}{dt} t\_dic =$$

- +  $p\_co2\_stf\_down / (cgt\_cellheight * cgt\_density)$       downward co<sub>2</sub> flux through the surface
- +  $(p\_lpp\_resp\_nh4)*(rfr\_c)$       respiration of large-cell phytoplankton
- +  $(p\_spp\_resp\_nh4)*(rfr\_c)$       respiration of small-cell phytoplankton
- +  $(p\_cya\_resp\_nh4)*(rfr\_c)$       respiration of diazotroph cyanobacteria
- +  $(p\_zoo\_resp\_nh4)*(rfr\_c)$       respiration of zooplankton
- +  $(p\_sed\_1\_resp\_nh4)*(rfr\_pc\_enrichment\_det*rfr\_c) / (cgt\_cellheight*cgt\_density)$       recycling of sedimentary detritus to ammonium using oxygen (respiration)
- +  $(p\_sed\_2\_resp\_nh4)*(rfr\_pc\_enrichment\_det*rfr\_c) / (cgt\_cellheight*cgt\_density)$       recycling of sedimentary detritus to ammonium using oxygen (respiration)

continued on next page...

## Tracer equations, continued from previous page

```

+ (p_sed_3_resp_nh4)*      recycling of sedimentary detritus to ammonium
(rfr_pc_enrichment_det*rfr_c) using oxygen (respiration)
/(cgt_cellheight*cgt_density)

+ (p_sed_4_resp_nh4)*      recycling of sedimentary detritus to ammonium
(rfr_pc_enrichment_det*rfr_c) using oxygen (respiration)
/(cgt_cellheight*cgt_density)

+ (p_sed_5_resp_nh4)*      recycling of sedimentary detritus to ammonium
(rfr_pc_enrichment_det*rfr_c) using oxygen (respiration)
/(cgt_cellheight*cgt_density)

+ (p_sed_6_resp_nh4)*      recycling of sedimentary detritus to ammonium
(rfr_pc_enrichment_det*rfr_c) using oxygen (respiration)
/(cgt_cellheight*cgt_density)

+ (p_sed_1_denit_nh4)*     recycling of sedimentary detritus to ammonium
(rfr_pc_enrichment_det*rfr_c) using nitrate (denitrification)
/(cgt_cellheight*cgt_density)

+ (p_sed_2_denit_nh4)*     recycling of sedimentary detritus to ammonium
(rfr_pc_enrichment_det*rfr_c) using nitrate (denitrification)
/(cgt_cellheight*cgt_density)

+ (p_sed_3_denit_nh4)*     recycling of sedimentary detritus to ammonium
(rfr_pc_enrichment_det*rfr_c) using nitrate (denitrification)
/(cgt_cellheight*cgt_density)

+ (p_sed_4_denit_nh4)*     recycling of sedimentary detritus to ammonium
(rfr_pc_enrichment_det*rfr_c) using nitrate (denitrification)
/(cgt_cellheight*cgt_density)

+ (p_sed_5_denit_nh4)*     recycling of sedimentary detritus to ammonium
(rfr_pc_enrichment_det*rfr_c) using nitrate (denitrification)
/(cgt_cellheight*cgt_density)

+ (p_sed_6_denit_nh4)*     recycling of sedimentary detritus to ammonium
(rfr_pc_enrichment_det*rfr_c) using nitrate (denitrification)
/(cgt_cellheight*cgt_density)

+ (p_sed_1_sulf_nh4)*      recycling of sedimentary detritus to ammonium
(rfr_pc_enrichment_det*rfr_c) using sulfate (sulfate reduction)
/(cgt_cellheight*cgt_density)

```

continued on next page. . .



## Tracer equations, continued from previous page

```

+ (p_sed_2_sulf_nh4)*      recycling of sedimentary detritus to ammonium
(rfr_pc_enrichment_det*rfr_c) using sulfate (sulfate reduction)
/(cgt_cellheight*cgt_density)

+ (p_sed_3_sulf_nh4)*      recycling of sedimentary detritus to ammonium
(rfr_pc_enrichment_det*rfr_c) using sulfate (sulfate reduction)
/(cgt_cellheight*cgt_density)

+ (p_sed_4_sulf_nh4)*      recycling of sedimentary detritus to ammonium
(rfr_pc_enrichment_det*rfr_c) using sulfate (sulfate reduction)
/(cgt_cellheight*cgt_density)

+ (p_sed_5_sulf_nh4)*      recycling of sedimentary detritus to ammonium
(rfr_pc_enrichment_det*rfr_c) using sulfate (sulfate reduction)
/(cgt_cellheight*cgt_density)

+ (p_sed_6_sulf_nh4)*      recycling of sedimentary detritus to ammonium
(rfr_pc_enrichment_det*rfr_c) using sulfate (sulfate reduction)
/(cgt_cellheight*cgt_density)

+ (p_det_1_resp_nh4)*      recycling of detritus to ammonium using
(rfr_pc_enrichment_det*rfr_c) oxygen (respiration)

+ (p_det_2_resp_nh4)*      recycling of detritus to ammonium using
(rfr_pc_enrichment_det*rfr_c) oxygen (respiration)

+ (p_det_3_resp_nh4)*      recycling of detritus to ammonium using
(rfr_pc_enrichment_det*rfr_c) oxygen (respiration)

+ (p_det_4_resp_nh4)*      recycling of detritus to ammonium using
(rfr_pc_enrichment_det*rfr_c) oxygen (respiration)

+ (p_det_5_resp_nh4)*      recycling of detritus to ammonium using
(rfr_pc_enrichment_det*rfr_c) oxygen (respiration)

+ (p_det_6_resp_nh4)*      recycling of detritus to ammonium using
(rfr_pc_enrichment_det*rfr_c) oxygen (respiration)

+ (p_det_1_denit_nh4)*      recycling of detritus to ammonium using
(rfr_pc_enrichment_det*rfr_c) nitrate (denitrification)

+ (p_det_2_denit_nh4)*      recycling of detritus to ammonium using
(rfr_pc_enrichment_det*rfr_c) nitrate (denitrification)

```

continued on next page...

## Tracer equations, continued from previous page

```

+ (p_det_3_denit_nh4)*      recycling of detritus to ammonium using
(rfr_pc_enrichment_det*rfr_c) nitrate (denitrification)

+ (p_det_4_denit_nh4)*      recycling of detritus to ammonium using
(rfr_pc_enrichment_det*rfr_c) nitrate (denitrification)

+ (p_det_5_denit_nh4)*      recycling of detritus to ammonium using
(rfr_pc_enrichment_det*rfr_c) nitrate (denitrification)

+ (p_det_6_denit_nh4)*      recycling of detritus to ammonium using
(rfr_pc_enrichment_det*rfr_c) nitrate (denitrification)

+ (p_det_1_sulf_nh4)*       recycling of sedimentary detritus to ammonium
(rfr_pc_enrichment_det*rfr_c) using sulfate (sulfate reduction)

+ (p_det_2_sulf_nh4)*       recycling of sedimentary detritus to ammonium
(rfr_pc_enrichment_det*rfr_c) using sulfate (sulfate reduction)

+ (p_det_3_sulf_nh4)*       recycling of sedimentary detritus to ammonium
(rfr_pc_enrichment_det*rfr_c) using sulfate (sulfate reduction)

+ (p_det_4_sulf_nh4)*       recycling of sedimentary detritus to ammonium
(rfr_pc_enrichment_det*rfr_c) using sulfate (sulfate reduction)

+ (p_det_5_sulf_nh4)*       recycling of sedimentary detritus to ammonium
(rfr_pc_enrichment_det*rfr_c) using sulfate (sulfate reduction)

+ (p_det_6_sulf_nh4)*       recycling of sedimentary detritus to ammonium
(rfr_pc_enrichment_det*rfr_c) using sulfate (sulfate reduction)

+ (p_sed_1_mnred_mn2)*      recycling of sedimentary detritus to ammonium
(rfr_pc_enrichment_det*rfr_c) using manganese oxide (manganese reduction)
/(cgt_cellheight*cgt_density)

+ (p_sed_2_mnred_mn2)*      recycling of sedimentary detritus to ammonium
(rfr_pc_enrichment_det*rfr_c) using manganese oxide (manganese reduction)
/(cgt_cellheight*cgt_density)

+ (p_sed_3_mnred_mn2)*      recycling of sedimentary detritus to ammonium
(rfr_pc_enrichment_det*rfr_c) using manganese oxide (manganese reduction)
/(cgt_cellheight*cgt_density)

+ (p_sed_4_mnred_mn2)*      recycling of sedimentary detritus to ammonium
(rfr_pc_enrichment_det*rfr_c) using manganese oxide (manganese reduction)
/(cgt_cellheight*cgt_density)

```

continued on next page...

## Tracer equations, continued from previous page

```

+ (p_sed_5_mnred_mn2)*      recycling of sedimentary detritus to ammonium
(rfr_pc_enrichment_det*rfr_c) using manganese oxide (manganese reduction)
/(cgt_cellheight*cgt_density)

+ (p_sed_6_mnred_mn2)*      recycling of sedimentary detritus to ammonium
(rfr_pc_enrichment_det*rfr_c) using manganese oxide (manganese reduction)
/(cgt_cellheight*cgt_density)

+ (p_sed_1_irred_ims)*      recycling of sedimentary detritus to ammonium
(rfr_pc_enrichment_det*rfr_c) using iron hydroxide (iron reduction)
/(cgt_cellheight*cgt_density)

+ (p_sed_2_irred_ims)*      recycling of sedimentary detritus to ammonium
(rfr_pc_enrichment_det*rfr_c) using iron hydroxide (iron reduction)
/(cgt_cellheight*cgt_density)

+ (p_sed_3_irred_ims)*      recycling of sedimentary detritus to ammonium
(rfr_pc_enrichment_det*rfr_c) using iron hydroxide (iron reduction)
/(cgt_cellheight*cgt_density)

+ (p_sed_4_irred_ims)*      recycling of sedimentary detritus to ammonium
(rfr_pc_enrichment_det*rfr_c) using iron hydroxide (iron reduction)
/(cgt_cellheight*cgt_density)

+ (p_sed_5_irred_ims)*      recycling of sedimentary detritus to ammonium
(rfr_pc_enrichment_det*rfr_c) using iron hydroxide (iron reduction)
/(cgt_cellheight*cgt_density)

+ (p_sed_6_irred_ims)*      recycling of sedimentary detritus to ammonium
(rfr_pc_enrichment_det*rfr_c) using iron hydroxide (iron reduction)
/(cgt_cellheight*cgt_density)

+ (p_sed_1_irredips_ims)*   recycling of sedimentary detritus to ammonium
(rfr_pc_enrichment_det*rfr_c) using iron phosphate (iron reduction)
/(cgt_cellheight*cgt_density)

+ (p_sed_2_irredips_ims)*   recycling of sedimentary detritus to ammonium
(rfr_pc_enrichment_det*rfr_c) using iron phosphate (iron reduction)
/(cgt_cellheight*cgt_density)

+ (p_sed_3_irredips_ims)*   recycling of sedimentary detritus to ammonium
(rfr_pc_enrichment_det*rfr_c) using iron phosphate (iron reduction)
/(cgt_cellheight*cgt_density)

```

continued on next page...

## Tracer equations, continued from previous page

```

+ (p_sed_4_irredips_ims)*      recycling of sedimentary detritus to ammonium
(rfr_pc_enrichment_det*rfr_c) using iron phosphate (iron reduction)
/(cgt_cellheight*cgt_density)

+ (p_sed_5_irredips_ims)*      recycling of sedimentary detritus to ammonium
(rfr_pc_enrichment_det*rfr_c) using iron phosphate (iron reduction)
/(cgt_cellheight*cgt_density)

+ (p_sed_6_irredips_ims)*      recycling of sedimentary detritus to ammonium
(rfr_pc_enrichment_det*rfr_c) using iron phosphate (iron reduction)
/(cgt_cellheight*cgt_density)

+ (p_sed_1_irred_iim)*         recycling of sedimentary detritus to ammonium
(rfr_pc_enrichment_det*rfr_c) using iron hydroxide (iron reduction)
/(cgt_cellheight*cgt_density)

+ (p_sed_2_irred_iim)*         recycling of sedimentary detritus to ammonium
(rfr_pc_enrichment_det*rfr_c) using iron hydroxide (iron reduction)
/(cgt_cellheight*cgt_density)

+ (p_sed_3_irred_iim)*         recycling of sedimentary detritus to ammonium
(rfr_pc_enrichment_det*rfr_c) using iron hydroxide (iron reduction)
/(cgt_cellheight*cgt_density)

+ (p_sed_4_irred_iim)*         recycling of sedimentary detritus to ammonium
(rfr_pc_enrichment_det*rfr_c) using iron hydroxide (iron reduction)
/(cgt_cellheight*cgt_density)

+ (p_sed_5_irred_iim)*         recycling of sedimentary detritus to ammonium
(rfr_pc_enrichment_det*rfr_c) using iron hydroxide (iron reduction)
/(cgt_cellheight*cgt_density)

+ (p_sed_6_irred_iim)*         recycling of sedimentary detritus to ammonium
(rfr_pc_enrichment_det*rfr_c) using iron hydroxide (iron reduction)
/(cgt_cellheight*cgt_density)

+ (p_sed_1_irredips_iim)*      recycling of sedimentary detritus to ammonium
(rfr_pc_enrichment_det*rfr_c) using iron hydroxide (iron reduction)
/(cgt_cellheight*cgt_density)

+ (p_sed_2_irredips_iim)*      recycling of sedimentary detritus to ammonium
(rfr_pc_enrichment_det*rfr_c) using iron hydroxide (iron reduction)
/(cgt_cellheight*cgt_density)

```

continued on next page...

## Tracer equations, continued from previous page

```

+ (p_sed_3_irredips_iim)*      recycling of sedimentary detritus to ammonium
(rfr_pc_enrichment_det*rfr_c) using iron hydroxide (iron reduction)
/(cgt_cellheight*cgt_density)

+ (p_sed_4_irredips_iim)*      recycling of sedimentary detritus to ammonium
(rfr_pc_enrichment_det*rfr_c) using iron hydroxide (iron reduction)
/(cgt_cellheight*cgt_density)

+ (p_sed_5_irredips_iim)*      recycling of sedimentary detritus to ammonium
(rfr_pc_enrichment_det*rfr_c) using iron hydroxide (iron reduction)
/(cgt_cellheight*cgt_density)

+ (p_sed_6_irredips_iim)*      recycling of sedimentary detritus to ammonium
(rfr_pc_enrichment_det*rfr_c) using iron hydroxide (iron reduction)
/(cgt_cellheight*cgt_density)

+ (p_i3i_1_irred_i2i)*         recycling of sedimentary detritus to ammonium
(rfr_pc_enrichment_det*rfr_c) using iron-III in clay minerals (iron reduction)
/(cgt_cellheight*cgt_density)

+ (p_i3i_2_irred_i2i)*         recycling of sedimentary detritus to ammonium
(rfr_pc_enrichment_det*rfr_c) using iron-III in clay minerals (iron reduction)
/(cgt_cellheight*cgt_density)

+ (p_i3i_3_irred_i2i)*         recycling of sedimentary detritus to ammonium
(rfr_pc_enrichment_det*rfr_c) using iron-III in clay minerals (iron reduction)
/(cgt_cellheight*cgt_density)

+ (p_i3i_4_irred_i2i)*         recycling of sedimentary detritus to ammonium
(rfr_pc_enrichment_det*rfr_c) using iron-III in clay minerals (iron reduction)
/(cgt_cellheight*cgt_density)

+ (p_i3i_5_irred_i2i)*         recycling of sedimentary detritus to ammonium
(rfr_pc_enrichment_det*rfr_c) using iron-III in clay minerals (iron reduction)
/(cgt_cellheight*cgt_density)

+ (p_i3i_6_irred_i2i)*         recycling of sedimentary detritus to ammonium
(rfr_pc_enrichment_det*rfr_c) using iron-III in clay minerals (iron reduction)
/(cgt_cellheight*cgt_density)

+ (p_rho_diss_mn2)*(1.6)       rhodochrosite dissolution to manganese-II
/(cgt_cellheight*cgt_density)

```

continued on next page...

| Tracer equations, continued from previous page                                              |                                                                                                                                                      |
|---------------------------------------------------------------------------------------------|------------------------------------------------------------------------------------------------------------------------------------------------------|
| + (p_sed_1_sulfdeep_nh4)*<br>(rfr_pc_enrichment_det*rfr_c)<br>/(cgt_cellheight*cgt_density) | parameterization for recycling of sedimentary<br>detritus to ammonium below the deepest<br>sediment layer (sulfate reduction / methane<br>formation) |
| + (p_sed_2_sulfdeep_nh4)*<br>(rfr_pc_enrichment_det*rfr_c)<br>/(cgt_cellheight*cgt_density) | parameterization for recycling of sedimentary<br>detritus to ammonium below the deepest<br>sediment layer (sulfate reduction / methane<br>formation) |
| + (p_sed_3_sulfdeep_nh4)*<br>(rfr_pc_enrichment_det*rfr_c)<br>/(cgt_cellheight*cgt_density) | parameterization for recycling of sedimentary<br>detritus to ammonium below the deepest<br>sediment layer (sulfate reduction / methane<br>formation) |
| + (p_sed_4_sulfdeep_nh4)*<br>(rfr_pc_enrichment_det*rfr_c)<br>/(cgt_cellheight*cgt_density) | parameterization for recycling of sedimentary<br>detritus to ammonium below the deepest<br>sediment layer (sulfate reduction / methane<br>formation) |
| + (p_sed_5_sulfdeep_nh4)*<br>(rfr_pc_enrichment_det*rfr_c)<br>/(cgt_cellheight*cgt_density) | parameterization for recycling of sedimentary<br>detritus to ammonium below the deepest<br>sediment layer (sulfate reduction / methane<br>formation) |
| + (p_sed_6_sulfdeep_nh4)*<br>(rfr_pc_enrichment_det*rfr_c)<br>/(cgt_cellheight*cgt_density) | parameterization for recycling of sedimentary<br>detritus to ammonium below the deepest<br>sediment layer (sulfate reduction / methane<br>formation) |
| + (p_rho_biores_mow)*(1.6)<br>/(cgt_cellheight*cgt_density)                                 | bio resuspension of rhodochrosite                                                                                                                    |
| + (p_rho_ero_mow)*(1.6)<br>/(cgt_cellheight*cgt_density)                                    | bio resuspension of rhodochrosite                                                                                                                    |
| + p_poc_resp                                                                                | respiration of POC                                                                                                                                   |
| + p_poc_denit                                                                               | recycling of POC using nitrate (denitrification)                                                                                                     |
| + p_poc_sulf                                                                                | Mineralization of POC, e-acceptor sulfate<br>(sulfate reduction)                                                                                     |
| -<br>p_co2_stf_up/(cgt_cellheight*<br>cgt_density)                                          | upward co2 flux through the surface                                                                                                                  |
| continued on next page...                                                                   |                                                                                                                                                      |

## Tracer equations, continued from previous page

|                                                       |                                                      |
|-------------------------------------------------------|------------------------------------------------------|
| - (p_no3_assim_lpp)*(rfr_c)                           | assimilation of nitrate by large-cell phytoplankton  |
| - (p_nh4_assim_lpp)*(rfr_c)                           | assimilation of ammonium by large-cell phytoplankton |
| - (p_no3_assim_spp)*(rfr_c)                           | assimilation of nitrate by small-cell phytoplankton  |
| - (p_nh4_assim_spp)*(rfr_c)                           | assimilation of ammonium by small-cell phytoplankton |
| - (p_n2_assim_cya)*(rfr_c)                            | fixation of dinitrogen by diazotroph cyanobacteria   |
| - (p_mn2_prec_rho)*(1.6)/(cgt_cellheight*cgt_density) | manganese-II precipitation to rhodochrosite          |
| - p_assim_lpp_poc                                     | Production of POC by LPP                             |
| - p_assim_spp_poc                                     | Production of POC by SPP                             |
| - p_assim_cya_poc                                     | Production of POC by CYA                             |

## Change of: ammonium

|                                                          |                                         |
|----------------------------------------------------------|-----------------------------------------|
| $\frac{d}{dt} t\_nh4 =$                                  |                                         |
| + (p_lpp_resp_nh4)*((1-don_fraction))                    | respiration of large-cell phytoplankton |
| + (p_spp_resp_nh4)*((1-don_fraction))                    | respiration of small-cell phytoplankton |
| + (p_cya_resp_nh4)*((1-don_fraction))                    | respiration of diazotroph cyanobacteria |
| + (p_zoo_resp_nh4)*((1-don_fraction))                    | respiration of zooplankton              |
| + p_don_rec_nh4                                          | mineralization of DON                   |
| + (p_lpp_mort_det_1)*((1.0-(1.0/rfr_pc_enrichment_det))) | mortality of large-cell phytoplankton   |

continued on next page...

## Tracer equations, continued from previous page

```

+ (p_lpp_mort_det_2)*((1.0- mortality of large-cell phytoplankton
(1.0/rfr_pc_enrichment_det)))

+ (p_lpp_mort_det_3)*((1.0- mortality of large-cell phytoplankton
(1.0/rfr_pc_enrichment_det)))

+ (p_lpp_mort_det_4)*((1.0- mortality of large-cell phytoplankton
(1.0/rfr_pc_enrichment_det)))

+ (p_lpp_mort_det_5)*((1.0- mortality of large-cell phytoplankton
(1.0/rfr_pc_enrichment_det)))

+ (p_lpp_mort_det_6)*((1.0- mortality of large-cell phytoplankton
(1.0/rfr_pc_enrichment_det)))

+ (p_spp_mort_det_1)*((1.0- mortality of small-scale phytoplankton
(1.0/rfr_pc_enrichment_det)))

+ (p_spp_mort_det_2)*((1.0- mortality of small-scale phytoplankton
(1.0/rfr_pc_enrichment_det)))

+ (p_spp_mort_det_3)*((1.0- mortality of small-scale phytoplankton
(1.0/rfr_pc_enrichment_det)))

+ (p_spp_mort_det_4)*((1.0- mortality of small-scale phytoplankton
(1.0/rfr_pc_enrichment_det)))

+ (p_spp_mort_det_5)*((1.0- mortality of small-scale phytoplankton
(1.0/rfr_pc_enrichment_det)))

+ (p_spp_mort_det_6)*((1.0- mortality of small-scale phytoplankton
(1.0/rfr_pc_enrichment_det)))

+ (p_cya_mort_det_1)*((1.0- mortality of diazotroph cyanobacteria
(1.0/rfr_pc_enrichment_det)))

+ (p_cya_mort_det_2)*((1.0- mortality of diazotroph cyanobacteria
(1.0/rfr_pc_enrichment_det)))

+ (p_cya_mort_det_3)*((1.0- mortality of diazotroph cyanobacteria
(1.0/rfr_pc_enrichment_det)))

+ (p_cya_mort_det_4)*((1.0- mortality of diazotroph cyanobacteria
(1.0/rfr_pc_enrichment_det)))

```

continued on next page...



## Tracer equations, continued from previous page

```

+ (p_cya_mort_det_5)*((1.0- mortality of diazotroph cyanobacteria
(1.0/rfr_pc_enrichment_det)))

+ (p_cya_mort_det_6)*((1.0- mortality of diazotroph cyanobacteria
(1.0/rfr_pc_enrichment_det)))

+ (p_zoo_mort_det_1)*((1.0- mortality of zooplankton
(1.0/rfr_pc_enrichment_det)))

+ (p_zoo_mort_det_2)*((1.0- mortality of zooplankton
(1.0/rfr_pc_enrichment_det)))

+ (p_zoo_mort_det_3)*((1.0- mortality of zooplankton
(1.0/rfr_pc_enrichment_det)))

+ (p_zoo_mort_det_4)*((1.0- mortality of zooplankton
(1.0/rfr_pc_enrichment_det)))

+ (p_zoo_mort_det_5)*((1.0- mortality of zooplankton
(1.0/rfr_pc_enrichment_det)))

+ (p_zoo_mort_det_6)*((1.0- mortality of zooplankton
(1.0/rfr_pc_enrichment_det)))

+
recycling of sedimentary detritus to ammonium
p_sed_1_resp_nh4/(cgt_cellheigusing oxygen (respiration)
cgt_density)

+
recycling of sedimentary detritus to ammonium
p_sed_2_resp_nh4/(cgt_cellheigusing oxygen (respiration)
cgt_density)

+
recycling of sedimentary detritus to ammonium
p_sed_3_resp_nh4/(cgt_cellheigusing oxygen (respiration)
cgt_density)

+
recycling of sedimentary detritus to ammonium
p_sed_4_resp_nh4/(cgt_cellheigusing oxygen (respiration)
cgt_density)

+
recycling of sedimentary detritus to ammonium
p_sed_5_resp_nh4/(cgt_cellheigusing oxygen (respiration)
cgt_density)

```

continued on next page...

## Tracer equations, continued from previous page

```

+                                recycling of sedimentary detritus to ammonium
p_sed_6_resp_nh4/(cgt_cellheigusing oxygen (respiration)
cgt_density)

+                                recycling of sedimentary detritus to ammonium
p_sed_1_denit_nh4/(cgt_cellheigusing nitrate (denitrification)
cgt_density)

+                                recycling of sedimentary detritus to ammonium
p_sed_2_denit_nh4/(cgt_cellheigusing nitrate (denitrification)
cgt_density)

+                                recycling of sedimentary detritus to ammonium
p_sed_3_denit_nh4/(cgt_cellheigusing nitrate (denitrification)
cgt_density)

+                                recycling of sedimentary detritus to ammonium
p_sed_4_denit_nh4/(cgt_cellheigusing nitrate (denitrification)
cgt_density)

+                                recycling of sedimentary detritus to ammonium
p_sed_5_denit_nh4/(cgt_cellheigusing nitrate (denitrification)
cgt_density)

+                                recycling of sedimentary detritus to ammonium
p_sed_6_denit_nh4/(cgt_cellheigusing nitrate (denitrification)
cgt_density)

+                                recycling of sedimentary detritus to ammonium
p_sed_1_sulf_nh4/(cgt_cellheigusing sulfate (sulfate reduction)
cgt_density)

+                                recycling of sedimentary detritus to ammonium
p_sed_2_sulf_nh4/(cgt_cellheigusing sulfate (sulfate reduction)
cgt_density)

+                                recycling of sedimentary detritus to ammonium
p_sed_3_sulf_nh4/(cgt_cellheigusing sulfate (sulfate reduction)
cgt_density)

+                                recycling of sedimentary detritus to ammonium
p_sed_4_sulf_nh4/(cgt_cellheigusing sulfate (sulfate reduction)
cgt_density)

```

continued on next page. . .

## Tracer equations, continued from previous page

|                                                     |                                                                                    |
|-----------------------------------------------------|------------------------------------------------------------------------------------|
| +<br>p_sed_5_sulf_nh4/(cgt_cellheig<br>cgt_density) | recycling of sedimentary detritus to ammonium<br>using sulfate (sulfate reduction) |
| +<br>p_sed_6_sulf_nh4/(cgt_cellheig<br>cgt_density) | recycling of sedimentary detritus to ammonium<br>using sulfate (sulfate reduction) |
| + p_det_1_resp_nh4                                  | recycling of detritus to ammonium using<br>oxygen (respiration)                    |
| + p_det_2_resp_nh4                                  | recycling of detritus to ammonium using<br>oxygen (respiration)                    |
| + p_det_3_resp_nh4                                  | recycling of detritus to ammonium using<br>oxygen (respiration)                    |
| + p_det_4_resp_nh4                                  | recycling of detritus to ammonium using<br>oxygen (respiration)                    |
| + p_det_5_resp_nh4                                  | recycling of detritus to ammonium using<br>oxygen (respiration)                    |
| + p_det_6_resp_nh4                                  | recycling of detritus to ammonium using<br>oxygen (respiration)                    |
| + p_det_1_denit_nh4                                 | recycling of detritus to ammonium using<br>nitrate (denitrification)               |
| + p_det_2_denit_nh4                                 | recycling of detritus to ammonium using<br>nitrate (denitrification)               |
| + p_det_3_denit_nh4                                 | recycling of detritus to ammonium using<br>nitrate (denitrification)               |
| + p_det_4_denit_nh4                                 | recycling of detritus to ammonium using<br>nitrate (denitrification)               |
| + p_det_5_denit_nh4                                 | recycling of detritus to ammonium using<br>nitrate (denitrification)               |
| + p_det_6_denit_nh4                                 | recycling of detritus to ammonium using<br>nitrate (denitrification)               |

continued on next page . .

## Tracer equations, continued from previous page

|                                                     |                                                                                           |
|-----------------------------------------------------|-------------------------------------------------------------------------------------------|
| + p_det_1_sulf_nh4                                  | recycling of sedimentary detritus to ammonium using sulfate (sulfate reduction)           |
| + p_det_2_sulf_nh4                                  | recycling of sedimentary detritus to ammonium using sulfate (sulfate reduction)           |
| + p_det_3_sulf_nh4                                  | recycling of sedimentary detritus to ammonium using sulfate (sulfate reduction)           |
| + p_det_4_sulf_nh4                                  | recycling of sedimentary detritus to ammonium using sulfate (sulfate reduction)           |
| + p_det_5_sulf_nh4                                  | recycling of sedimentary detritus to ammonium using sulfate (sulfate reduction)           |
| + p_det_6_sulf_nh4                                  | recycling of sedimentary detritus to ammonium using sulfate (sulfate reduction)           |
| +<br>p_sed_1_mnred_mn2/(cgt_cellhei<br>cgt_density) | recycling of sedimentary detritus to ammonium using manganese oxide (manganese reduction) |
| +<br>p_sed_2_mnred_mn2/(cgt_cellhei<br>cgt_density) | recycling of sedimentary detritus to ammonium using manganese oxide (manganese reduction) |
| +<br>p_sed_3_mnred_mn2/(cgt_cellhei<br>cgt_density) | recycling of sedimentary detritus to ammonium using manganese oxide (manganese reduction) |
| +<br>p_sed_4_mnred_mn2/(cgt_cellhei<br>cgt_density) | recycling of sedimentary detritus to ammonium using manganese oxide (manganese reduction) |
| +<br>p_sed_5_mnred_mn2/(cgt_cellhei<br>cgt_density) | recycling of sedimentary detritus to ammonium using manganese oxide (manganese reduction) |
| +<br>p_sed_6_mnred_mn2/(cgt_cellhei<br>cgt_density) | recycling of sedimentary detritus to ammonium using manganese oxide (manganese reduction) |
| +<br>p_sed_1_irred_ims/(cgt_cellhei<br>cgt_density) | recycling of sedimentary detritus to ammonium using iron hydroxide (iron reduction)       |

continued on next page...

## Tracer equations, continued from previous page

```

+                                recycling of sedimentary detritus to ammonium
p_sed_2_irred_ims/(cgt_cellheusing iron hydroxide (iron reduction)
cgt_density)

+                                recycling of sedimentary detritus to ammonium
p_sed_3_irred_ims/(cgt_cellheusing iron hydroxide (iron reduction)
cgt_density)

+                                recycling of sedimentary detritus to ammonium
p_sed_4_irred_ims/(cgt_cellheusing iron hydroxide (iron reduction)
cgt_density)

+                                recycling of sedimentary detritus to ammonium
p_sed_5_irred_ims/(cgt_cellheusing iron hydroxide (iron reduction)
cgt_density)

+                                recycling of sedimentary detritus to ammonium
p_sed_6_irred_ims/(cgt_cellheusing iron hydroxide (iron reduction)
cgt_density)

+                                recycling of sedimentary detritus to ammonium
p_sed_1_irredips_ims/(cgt_cellusing iron phosphate (iron reduction)
cgt_density)

+                                recycling of sedimentary detritus to ammonium
p_sed_2_irredips_ims/(cgt_cellusing iron phosphate (iron reduction)
cgt_density)

+                                recycling of sedimentary detritus to ammonium
p_sed_3_irredips_ims/(cgt_cellusing iron phosphate (iron reduction)
cgt_density)

+                                recycling of sedimentary detritus to ammonium
p_sed_4_irredips_ims/(cgt_cellusing iron phosphate (iron reduction)
cgt_density)

+                                recycling of sedimentary detritus to ammonium
p_sed_5_irredips_ims/(cgt_cellusing iron phosphate (iron reduction)
cgt_density)

+                                recycling of sedimentary detritus to ammonium
p_sed_6_irredips_ims/(cgt_cellusing iron phosphate (iron reduction)
cgt_density)

```

continued on next page...

## Tracer equations, continued from previous page

```

+                                recycling of sedimentary detritus to ammonium
p_sed_1_irred_iim/(cgt_cellheusing iron hydroxide (iron reduction)
cgt_density)

+                                recycling of sedimentary detritus to ammonium
p_sed_2_irred_iim/(cgt_cellheusing iron hydroxide (iron reduction)
cgt_density)

+                                recycling of sedimentary detritus to ammonium
p_sed_3_irred_iim/(cgt_cellheusing iron hydroxide (iron reduction)
cgt_density)

+                                recycling of sedimentary detritus to ammonium
p_sed_4_irred_iim/(cgt_cellheusing iron hydroxide (iron reduction)
cgt_density)

+                                recycling of sedimentary detritus to ammonium
p_sed_5_irred_iim/(cgt_cellheusing iron hydroxide (iron reduction)
cgt_density)

+                                recycling of sedimentary detritus to ammonium
p_sed_6_irred_iim/(cgt_cellheusing iron hydroxide (iron reduction)
cgt_density)

+                                recycling of sedimentary detritus to ammonium
p_sed_1_irredips_iim/(cgt_cellusing iron hydroxide (iron reduction)
cgt_density)

+                                recycling of sedimentary detritus to ammonium
p_sed_2_irredips_iim/(cgt_cellusing iron hydroxide (iron reduction)
cgt_density)

+                                recycling of sedimentary detritus to ammonium
p_sed_3_irredips_iim/(cgt_cellusing iron hydroxide (iron reduction)
cgt_density)

+                                recycling of sedimentary detritus to ammonium
p_sed_4_irredips_iim/(cgt_cellusing iron hydroxide (iron reduction)
cgt_density)

+                                recycling of sedimentary detritus to ammonium
p_sed_5_irredips_iim/(cgt_cellusing iron hydroxide (iron reduction)
cgt_density)

```

continued on next page...

## Tracer equations, continued from previous page

```

+                                recycling of sedimentary detritus to ammonium
p_sed_6_irredips_iim/(cgt_cellusing iron hydroxide (iron reduction)
cgt_density)

+                                recycling of sedimentary detritus to ammonium
p_i3i_1_irred_i2i/(cgt_cellheiusing iron-III in clay minerals (iron reduction)
cgt_density)

+                                recycling of sedimentary detritus to ammonium
p_i3i_2_irred_i2i/(cgt_cellheiusing iron-III in clay minerals (iron reduction)
cgt_density)

+                                recycling of sedimentary detritus to ammonium
p_i3i_3_irred_i2i/(cgt_cellheiusing iron-III in clay minerals (iron reduction)
cgt_density)

+                                recycling of sedimentary detritus to ammonium
p_i3i_4_irred_i2i/(cgt_cellheiusing iron-III in clay minerals (iron reduction)
cgt_density)

+                                recycling of sedimentary detritus to ammonium
p_i3i_5_irred_i2i/(cgt_cellheiusing iron-III in clay minerals (iron reduction)
cgt_density)

+                                recycling of sedimentary detritus to ammonium
p_i3i_6_irred_i2i/(cgt_cellheiusing iron-III in clay minerals (iron reduction)
cgt_density)

+                                ammonium liberation from illite-
p_aim_lib_nh4/(cgt_cellheight*montmorillonite mixed layer minerals
cgt_density)

+                                parameterization for recycling of sedimentary
p_sed_1_sulfdeep_nh4/(cgt_celldetritus to ammonium below the deepest
cgt_density)                                sediment layer (sulfate reduction / methane
                                                formation)

+                                parameterization for recycling of sedimentary
p_sed_2_sulfdeep_nh4/(cgt_celldetritus to ammonium below the deepest
cgt_density)                                sediment layer (sulfate reduction / methane
                                                formation)

+                                parameterization for recycling of sedimentary
p_sed_3_sulfdeep_nh4/(cgt_celldetritus to ammonium below the deepest
cgt_density)                                sediment layer (sulfate reduction / methane
                                                formation)

```

continued on next page...

## Tracer equations, continued from previous page

|   |                                                                                                                   |                                                                                                                                 |
|---|-------------------------------------------------------------------------------------------------------------------|---------------------------------------------------------------------------------------------------------------------------------|
| + | $p\_sed\_4\_sulfdeep\_nh4 / (cgt\_cellheight \cdot detritus\_to\_ammonium\_below\_the\_deepest\_sediment\_layer)$ | parameterization for recycling of sedimentary ammonium below the deepest sediment layer (sulfate reduction / methane formation) |
| + | $p\_sed\_5\_sulfdeep\_nh4 / (cgt\_cellheight \cdot detritus\_to\_ammonium\_below\_the\_deepest\_sediment\_layer)$ | parameterization for recycling of sedimentary ammonium below the deepest sediment layer (sulfate reduction / methane formation) |
| + | $p\_sed\_6\_sulfdeep\_nh4 / (cgt\_cellheight \cdot detritus\_to\_ammonium\_below\_the\_deepest\_sediment\_layer)$ | parameterization for recycling of sedimentary ammonium below the deepest sediment layer (sulfate reduction / methane formation) |
| - | $p\_nh4\_assim\_lpp$                                                                                              | assimilation of ammonium by large-cell phytoplankton                                                                            |
| - | $p\_nh4\_assim\_spp$                                                                                              | assimilation of ammonium by small-cell phytoplankton                                                                            |
| - | $p\_nh4\_nit\_no3$                                                                                                | nitrification                                                                                                                   |
| - | $p\_nh4\_nit\_no3\_sed$                                                                                           | nitrification in the sediment                                                                                                   |
| - | $p\_nh4\_ads\_aim / (cgt\_cellheight \cdot mixed\_layer\_minerals)$                                               | ammonium adsorption to illite-montmorillonite                                                                                   |

## Change of: nitrate

$$\frac{d}{dt} t\_no3 =$$

|   |                                                                                                                |                                                     |
|---|----------------------------------------------------------------------------------------------------------------|-----------------------------------------------------|
| + | $p\_nh4\_nit\_no3$                                                                                             | nitrification                                       |
| + | $p\_nh4\_nit\_no3\_sed$                                                                                        | nitrification in the sediment                       |
| + | $p\_aim\_nit\_no3\_sed / (cgt\_cellheight \cdot detritus\_to\_ammonium\_below\_the\_deepest\_sediment\_layer)$ | nitrification in the sediment                       |
| - | $p\_no3\_assim\_lpp$                                                                                           | assimilation of nitrate by large-cell phytoplankton |
| - | $p\_no3\_assim\_spp$                                                                                           | assimilation of nitrate by small-cell phytoplankton |

continued on next page...



## Tracer equations, continued from previous page

|                                                                                        |                                                                                  |
|----------------------------------------------------------------------------------------|----------------------------------------------------------------------------------|
| - (p_sed_1_denit_nh4)*<br>(rfr_pc_enrichment_det*5.3)<br>/(cgt_cellheight*cgt_density) | recycling of sedimentary detritus to ammonium<br>using nitrate (denitrification) |
| - (p_sed_2_denit_nh4)*<br>(rfr_pc_enrichment_det*5.3)<br>/(cgt_cellheight*cgt_density) | recycling of sedimentary detritus to ammonium<br>using nitrate (denitrification) |
| - (p_sed_3_denit_nh4)*<br>(rfr_pc_enrichment_det*5.3)<br>/(cgt_cellheight*cgt_density) | recycling of sedimentary detritus to ammonium<br>using nitrate (denitrification) |
| - (p_sed_4_denit_nh4)*<br>(rfr_pc_enrichment_det*5.3)<br>/(cgt_cellheight*cgt_density) | recycling of sedimentary detritus to ammonium<br>using nitrate (denitrification) |
| - (p_sed_5_denit_nh4)*<br>(rfr_pc_enrichment_det*5.3)<br>/(cgt_cellheight*cgt_density) | recycling of sedimentary detritus to ammonium<br>using nitrate (denitrification) |
| - (p_sed_6_denit_nh4)*<br>(rfr_pc_enrichment_det*5.3)<br>/(cgt_cellheight*cgt_density) | recycling of sedimentary detritus to ammonium<br>using nitrate (denitrification) |
| - (p_h2s_oxno3_sul)*(0.4)                                                              | oxidation of hydrogen sulfide with nitrate                                       |
| - (p_sul_oxno3_so4)*(1.2)                                                              | oxidation of elemental sulfur with nitrate                                       |
| - (p_det_1_denit_nh4)*<br>(rfr_pc_enrichment_det*5.3)                                  | recycling of detritus to ammonium using<br>nitrate (denitrification)             |
| - (p_det_2_denit_nh4)*<br>(rfr_pc_enrichment_det*5.3)                                  | recycling of detritus to ammonium using<br>nitrate (denitrification)             |
| - (p_det_3_denit_nh4)*<br>(rfr_pc_enrichment_det*5.3)                                  | recycling of detritus to ammonium using<br>nitrate (denitrification)             |
| - (p_det_4_denit_nh4)*<br>(rfr_pc_enrichment_det*5.3)                                  | recycling of detritus to ammonium using<br>nitrate (denitrification)             |
| - (p_det_5_denit_nh4)*<br>(rfr_pc_enrichment_det*5.3)                                  | recycling of detritus to ammonium using<br>nitrate (denitrification)             |

continued on next page. . .

## Tracer equations, continued from previous page

|                                                       |                                                                      |
|-------------------------------------------------------|----------------------------------------------------------------------|
| - (p_det_6_denit_nh4)*<br>(rfr_pc_enrichment_det*5.3) | recycling of detritus to ammonium using<br>nitrate (denitrification) |
| - (p_poc_denit)*(0.8)                                 | recycling of POC using nitrate (denitrification)                     |

## Change of: phosphate

|                                                                                            |                                                                                        |
|--------------------------------------------------------------------------------------------|----------------------------------------------------------------------------------------|
| $\frac{d}{dt} t_{po4} =$                                                                   |                                                                                        |
| + (p_lpp_resp_nh4)*(rfr_p)                                                                 | respiration of large-cell phytoplankton                                                |
| + (p_spp_resp_nh4)*(rfr_p)                                                                 | respiration of small-cell phytoplankton                                                |
| + (p_cya_resp_nh4)*(rfr_p)                                                                 | respiration of diazotroph cyanobacteria                                                |
| + (p_zoo_resp_nh4)*(rfr_p)                                                                 | respiration of zooplankton                                                             |
| + (p_sed_1_irredips_ims)*<br>(26.5*rfr_pc_enrichment_det)<br>/(cgt_cellheight*cgt_density) | recycling of sedimentary detritus to ammonium<br>using iron phosphate (iron reduction) |
| + (p_sed_2_irredips_ims)*<br>(26.5*rfr_pc_enrichment_det)<br>/(cgt_cellheight*cgt_density) | recycling of sedimentary detritus to ammonium<br>using iron phosphate (iron reduction) |
| + (p_sed_3_irredips_ims)*<br>(26.5*rfr_pc_enrichment_det)<br>/(cgt_cellheight*cgt_density) | recycling of sedimentary detritus to ammonium<br>using iron phosphate (iron reduction) |
| + (p_sed_4_irredips_ims)*<br>(26.5*rfr_pc_enrichment_det)<br>/(cgt_cellheight*cgt_density) | recycling of sedimentary detritus to ammonium<br>using iron phosphate (iron reduction) |
| + (p_sed_5_irredips_ims)*<br>(26.5*rfr_pc_enrichment_det)<br>/(cgt_cellheight*cgt_density) | recycling of sedimentary detritus to ammonium<br>using iron phosphate (iron reduction) |
| + (p_sed_6_irredips_ims)*<br>(26.5*rfr_pc_enrichment_det)<br>/(cgt_cellheight*cgt_density) | recycling of sedimentary detritus to ammonium<br>using iron phosphate (iron reduction) |
| + (p_sed_1_irredips_iim)*<br>(rfr_pc_enrichment_det*26.5)<br>/(cgt_cellheight*cgt_density) | recycling of sedimentary detritus to ammonium<br>using iron hydroxide (iron reduction) |

continued on next page...

## Tracer equations, continued from previous page

```

+ (p_sed_2_irredips_iim)*      recycling of sedimentary detritus to ammonium
(rfr_pc_enrichment_det*26.5) using iron hydroxide (iron reduction)
/(cgt_cellheight*cgt_density)

+ (p_sed_3_irredips_iim)*      recycling of sedimentary detritus to ammonium
(rfr_pc_enrichment_det*26.5) using iron hydroxide (iron reduction)
/(cgt_cellheight*cgt_density)

+ (p_sed_4_irredips_iim)*      recycling of sedimentary detritus to ammonium
(rfr_pc_enrichment_det*26.5) using iron hydroxide (iron reduction)
/(cgt_cellheight*cgt_density)

+ (p_sed_5_irredips_iim)*      recycling of sedimentary detritus to ammonium
(rfr_pc_enrichment_det*26.5) using iron hydroxide (iron reduction)
/(cgt_cellheight*cgt_density)

+ (p_sed_6_irredips_iim)*      recycling of sedimentary detritus to ammonium
(rfr_pc_enrichment_det*26.5) using iron hydroxide (iron reduction)
/(cgt_cellheight*cgt_density)

+                               dissolution of iron phosphate
p_ips_diss_po4/(cgt_cellheight
cgt_density)

+ p_ipw_diss_po4                dissolution of iron phosphate

+                               phosphate liberation from illite-
p_pim_lib_po4/(cgt_cellheight*montmorillonite mixed layer minerals
cgt_density)

+ (p_detp_1_remin_po4)*        recycling of detritus to ammonium using
(rfr_pc_enrichment_det*rfr_p) oxygen (respiration)

+ (p_detp_2_remin_po4)*        recycling of detritus to ammonium using
(rfr_pc_enrichment_det*rfr_p) oxygen (respiration)

+ (p_detp_3_remin_po4)*        recycling of detritus to ammonium using
(rfr_pc_enrichment_det*rfr_p) oxygen (respiration)

+ (p_detp_4_remin_po4)*        recycling of detritus to ammonium using
(rfr_pc_enrichment_det*rfr_p) oxygen (respiration)

+ (p_detp_5_remin_po4)*        recycling of detritus to ammonium using
(rfr_pc_enrichment_det*rfr_p) oxygen (respiration)

```

continued on next page...

## Tracer equations, continued from previous page

```

+ (p_detp_6_remin_po4)*      recycling of detritus to ammonium using
(rfr_pc_enrichment_det*rfr_p) oxygen (respiration)

+ (p_sedp_1_remin_po4)*      recycling of sediment detrital phosphate
(rfr_pc_enrichment_det*rfr_p)
/(cgt_cellheight*cgt_density)

+ (p_sedp_2_remin_po4)*      recycling of sediment detrital phosphate
(rfr_pc_enrichment_det*rfr_p)
/(cgt_cellheight*cgt_density)

+ (p_sedp_3_remin_po4)*      recycling of sediment detrital phosphate
(rfr_pc_enrichment_det*rfr_p)
/(cgt_cellheight*cgt_density)

+ (p_sedp_4_remin_po4)*      recycling of sediment detrital phosphate
(rfr_pc_enrichment_det*rfr_p)
/(cgt_cellheight*cgt_density)

+ (p_sedp_5_remin_po4)*      recycling of sediment detrital phosphate
(rfr_pc_enrichment_det*rfr_p)
/(cgt_cellheight*cgt_density)

+ (p_sedp_6_remin_po4)*      recycling of sediment detrital phosphate
(rfr_pc_enrichment_det*rfr_p)
/(cgt_cellheight*cgt_density)

+ (p_sedp_1_sulfdeep_po4)*    parameterization for recycling of sedimentary
(rfr_pc_enrichment_det*rfr_p) detritus to ammonium below the deepest
/(cgt_cellheight*cgt_density) sediment layer (sulfate reduction / methane
formation)

+ (p_sedp_2_sulfdeep_po4)*    parameterization for recycling of sedimentary
(rfr_pc_enrichment_det*rfr_p) detritus to ammonium below the deepest
/(cgt_cellheight*cgt_density) sediment layer (sulfate reduction / methane
formation)

+ (p_sedp_3_sulfdeep_po4)*    parameterization for recycling of sedimentary
(rfr_pc_enrichment_det*rfr_p) detritus to ammonium below the deepest
/(cgt_cellheight*cgt_density) sediment layer (sulfate reduction / methane
formation)

```

continued on next page...

## Tracer equations, continued from previous page

|                                                                                              |                                                                                                                                                      |
|----------------------------------------------------------------------------------------------|------------------------------------------------------------------------------------------------------------------------------------------------------|
| + (p_sedp_4_sulfdeep_po4)*<br>(rfr_pc_enrichment_det*rfr_p)<br>/(cgt_cellheight*cgt_density) | parameterization for recycling of sedimentary<br>detritus to ammonium below the deepest<br>sediment layer (sulfate reduction / methane<br>formation) |
| + (p_sedp_5_sulfdeep_po4)*<br>(rfr_pc_enrichment_det*rfr_p)<br>/(cgt_cellheight*cgt_density) | parameterization for recycling of sedimentary<br>detritus to ammonium below the deepest<br>sediment layer (sulfate reduction / methane<br>formation) |
| + (p_sedp_6_sulfdeep_po4)*<br>(rfr_pc_enrichment_det*rfr_p)<br>/(cgt_cellheight*cgt_density) | parameterization for recycling of sedimentary<br>detritus to ammonium below the deepest<br>sediment layer (sulfate reduction / methane<br>formation) |
| - (p_no3_assim_lpp)*(rfr_p)                                                                  | assimilation of nitrate by large-cell<br>phytoplankton                                                                                               |
| - (p_nh4_assim_lpp)*(rfr_p)                                                                  | assimilation of ammonium by large-cell<br>phytoplankton                                                                                              |
| - (p_no3_assim_spp)*(rfr_p)                                                                  | assimilation of nitrate by small-cell<br>phytoplankton                                                                                               |
| - (p_nh4_assim_spp)*(rfr_p)                                                                  | assimilation of ammonium by small-cell<br>phytoplankton                                                                                              |
| - (p_n2_assim_cya)*(rfr_p)                                                                   | fixation of dinitrogen by diazotroph<br>cyanobacteria                                                                                                |
| -<br>p_po4_ads_ips/(cgt_cellheight*particles<br>cgt_density)                                 | adsorption of phosphate to iron hydroxide<br>particles                                                                                               |
| - p_po4_ads_ipw                                                                              | adsorption of phosphate to iron hydroxide<br>particles                                                                                               |
| -<br>p_po4_ads_pim/(cgt_cellheight*mixed layer minerals<br>cgt_density)                      | phosphate adsorption to illite-montmorillonite<br>mixed layer minerals                                                                               |

Change of: small-cell phytoplankton

 $\frac{d}{dt} t_{spp} =$ 

continued on next page...

## Tracer equations, continued from previous page

|                    |                                                        |
|--------------------|--------------------------------------------------------|
| + p_no3_assim_spp  | assimilation of nitrate by small-cell phytoplankton    |
| + p_nh4_assim_spp  | assimilation of ammonium by small-cell phytoplankton   |
| - p_spp_graz_zoo   | grazing of zooplankton eating small-cell phytoplankton |
| - p_spp_resp_nh4   | respiration of small-cell phytoplankton                |
| - p_spp_mort_det_1 | mortality of small-scale phytoplankton                 |
| - p_spp_mort_det_2 | mortality of small-scale phytoplankton                 |
| - p_spp_mort_det_3 | mortality of small-scale phytoplankton                 |
| - p_spp_mort_det_4 | mortality of small-scale phytoplankton                 |
| - p_spp_mort_det_5 | mortality of small-scale phytoplankton                 |
| - p_spp_mort_det_6 | mortality of small-scale phytoplankton                 |

## Change of: zooplankton

$$\frac{d}{dt} t_{\text{zoo}} =$$

|                    |                                                        |
|--------------------|--------------------------------------------------------|
| + p_lpp_graz_zoo   | grazing of zooplankton eating large-cell phytoplankton |
| + p_spp_graz_zoo   | grazing of zooplankton eating small-cell phytoplankton |
| + p_cya_graz_zoo   | grazing of zooplankton eating diazotroph cyanobacteria |
| - p_zoo_resp_nh4   | respiration of zooplankton                             |
| - p_zoo_mort_det_1 | mortality of zooplankton                               |
| - p_zoo_mort_det_2 | mortality of zooplankton                               |
| - p_zoo_mort_det_3 | mortality of zooplankton                               |
| - p_zoo_mort_det_4 | mortality of zooplankton                               |

continued on next page . .

## Tracer equations, continued from previous page

|                    |                          |
|--------------------|--------------------------|
| - p_zoo_mort_det_5 | mortality of zooplankton |
| - p_zoo_mort_det_6 | mortality of zooplankton |

## Change of: hydrogen sulfide

|                                                                                              |                                                                                    |
|----------------------------------------------------------------------------------------------|------------------------------------------------------------------------------------|
| $\frac{d}{dt} t_{h2s} =$                                                                     |                                                                                    |
| + (p_sed_1_sulf_nh4)*<br>(rfr_pc_enrichment_det*<br>3.3125)/(cgt_cellheight*<br>cgt_density) | recycling of sedimentary detritus to ammonium<br>using sulfate (sulfate reduction) |
| + (p_sed_2_sulf_nh4)*<br>(rfr_pc_enrichment_det*<br>3.3125)/(cgt_cellheight*<br>cgt_density) | recycling of sedimentary detritus to ammonium<br>using sulfate (sulfate reduction) |
| + (p_sed_3_sulf_nh4)*<br>(rfr_pc_enrichment_det*<br>3.3125)/(cgt_cellheight*<br>cgt_density) | recycling of sedimentary detritus to ammonium<br>using sulfate (sulfate reduction) |
| + (p_sed_4_sulf_nh4)*<br>(rfr_pc_enrichment_det*<br>3.3125)/(cgt_cellheight*<br>cgt_density) | recycling of sedimentary detritus to ammonium<br>using sulfate (sulfate reduction) |
| + (p_sed_5_sulf_nh4)*<br>(rfr_pc_enrichment_det*<br>3.3125)/(cgt_cellheight*<br>cgt_density) | recycling of sedimentary detritus to ammonium<br>using sulfate (sulfate reduction) |
| + (p_sed_6_sulf_nh4)*<br>(rfr_pc_enrichment_det*<br>3.3125)/(cgt_cellheight*<br>cgt_density) | recycling of sedimentary detritus to ammonium<br>using sulfate (sulfate reduction) |
| + (p_det_1_sulf_nh4)*<br>(rfr_pc_enrichment_det*<br>3.3125)                                  | recycling of sedimentary detritus to ammonium<br>using sulfate (sulfate reduction) |
| + (p_det_2_sulf_nh4)*<br>(rfr_pc_enrichment_det*<br>3.3125)                                  | recycling of sedimentary detritus to ammonium<br>using sulfate (sulfate reduction) |

continued on next page...

## Tracer equations, continued from previous page

|                                                                                                  |                                                                                                                                                      |
|--------------------------------------------------------------------------------------------------|------------------------------------------------------------------------------------------------------------------------------------------------------|
| + (p_det_3_sulf_nh4)*<br>(rfr_pc_enrichment_det*<br>3.3125)                                      | recycling of sedimentary detritus to ammonium<br>using sulfate (sulfate reduction)                                                                   |
| + (p_det_4_sulf_nh4)*<br>(rfr_pc_enrichment_det*<br>3.3125)                                      | recycling of sedimentary detritus to ammonium<br>using sulfate (sulfate reduction)                                                                   |
| + (p_det_5_sulf_nh4)*<br>(rfr_pc_enrichment_det*<br>3.3125)                                      | recycling of sedimentary detritus to ammonium<br>using sulfate (sulfate reduction)                                                                   |
| + (p_det_6_sulf_nh4)*<br>(rfr_pc_enrichment_det*<br>3.3125)                                      | recycling of sedimentary detritus to ammonium<br>using sulfate (sulfate reduction)                                                                   |
| +<br>p_ims_diss_fe2/(cgt_cellheight<br>cgt_density)                                              | dissolution of magnetite to iron II<br>(precipitating iron hydroxides)                                                                               |
| +<br>p_ims_trans_iim/(cgt_cellheight<br>cgt_density)                                             | iron monosulfide transformation to<br>minnesotaite                                                                                                   |
| + (p_pyr_oxmos_ihs)*(1.625)<br>/(cgt_cellheight*cgt_density)                                     | oxidation of pyrite by manganese oxide to iron<br>oxyhydroxide                                                                                       |
| + (p_pyr_oxo2_ihs)*(1.75)<br>/(cgt_cellheight*cgt_density)                                       | oxidation of pyrite by manganese oxide to iron<br>oxyhydroxide                                                                                       |
| + (p_sed_1_sulfdeep_nh4)*<br>(rfr_pc_enrichment_det*<br>3.3125)/(cgt_cellheight*<br>cgt_density) | parameterization for recycling of sedimentary<br>detritus to ammonium below the deepest<br>sediment layer (sulfate reduction / methane<br>formation) |
| + (p_sed_2_sulfdeep_nh4)*<br>(rfr_pc_enrichment_det*<br>3.3125)/(cgt_cellheight*<br>cgt_density) | parameterization for recycling of sedimentary<br>detritus to ammonium below the deepest<br>sediment layer (sulfate reduction / methane<br>formation) |
| + (p_sed_3_sulfdeep_nh4)*<br>(rfr_pc_enrichment_det*<br>3.3125)/(cgt_cellheight*<br>cgt_density) | parameterization for recycling of sedimentary<br>detritus to ammonium below the deepest<br>sediment layer (sulfate reduction / methane<br>formation) |

continued on next page...



## Tracer equations, continued from previous page

|                                                                                                  |                                                                                                                                                      |
|--------------------------------------------------------------------------------------------------|------------------------------------------------------------------------------------------------------------------------------------------------------|
| + (p_sed_4_sulfdeep_nh4)*<br>(rfr_pc_enrichment_det*<br>3.3125)/(cgt_cellheight*<br>cgt_density) | parameterization for recycling of sedimentary<br>detritus to ammonium below the deepest<br>sediment layer (sulfate reduction / methane<br>formation) |
| + (p_sed_5_sulfdeep_nh4)*<br>(rfr_pc_enrichment_det*<br>3.3125)/(cgt_cellheight*<br>cgt_density) | parameterization for recycling of sedimentary<br>detritus to ammonium below the deepest<br>sediment layer (sulfate reduction / methane<br>formation) |
| + (p_sed_6_sulfdeep_nh4)*<br>(rfr_pc_enrichment_det*<br>3.3125)/(cgt_cellheight*<br>cgt_density) | parameterization for recycling of sedimentary<br>detritus to ammonium below the deepest<br>sediment layer (sulfate reduction / methane<br>formation) |
| + (p_ims_biores_ihw)*(1.125)<br>/(cgt_cellheight*cgt_density)                                    | bio resuspension of iron monosulfide                                                                                                                 |
| + (p_pyr_biores_ihw)*(1.875)<br>/(cgt_cellheight*cgt_density)                                    | bio resuspension of pyrite                                                                                                                           |
| + (p_rho_biores_mow)*(0.25)<br>/(cgt_cellheight*cgt_density)                                     | bio resuspension of rhodochrosite                                                                                                                    |
| + (p_iim_biores_ihw)*(0.125)<br>/(cgt_cellheight*cgt_density)                                    | bio resuspension of iron in clay minerals                                                                                                            |
| + (p_ims_ero_ihw)*(1.125)<br>/(cgt_cellheight*cgt_density)                                       | resuspension of iron monosulfide                                                                                                                     |
| + (p_pyr_ero_ihw)*(1.875)<br>/(cgt_cellheight*cgt_density)                                       | resuspension of pyrite                                                                                                                               |
| + (p_rho_ero_mow)*(0.25)<br>/(cgt_cellheight*cgt_density)                                        | bio resuspension of rhodochrosite                                                                                                                    |
| + (p_iim_ero_ihw)*(0.125)<br>/(cgt_cellheight*cgt_density)                                       | bio resuspension of iron in clay minerals                                                                                                            |
| + (p_poc_sulf)*(0.5)                                                                             | Mineralization of POC, e-acceptor sulfate<br>(sulfate reduction)                                                                                     |
| - p_h2s_oxo2_sul                                                                                 | oxidation of hydrogen sulfide with oxygen                                                                                                            |

continued on next page...

## Tracer equations, continued from previous page

|                                                                                    |                                                                                     |
|------------------------------------------------------------------------------------|-------------------------------------------------------------------------------------|
| - p_h2s_oxno3_sul                                                                  | oxidation of hydrogen sulfide with nitrate                                          |
| - (p_sed_1_irred_ims)*(26.5*rfr_pc_enrichment_det)/(cgt_cellheight*cgt_density)    | recycling of sedimentary detritus to ammonium using iron hydroxide (iron reduction) |
| - (p_sed_2_irred_ims)*(26.5*rfr_pc_enrichment_det)/(cgt_cellheight*cgt_density)    | recycling of sedimentary detritus to ammonium using iron hydroxide (iron reduction) |
| - (p_sed_3_irred_ims)*(26.5*rfr_pc_enrichment_det)/(cgt_cellheight*cgt_density)    | recycling of sedimentary detritus to ammonium using iron hydroxide (iron reduction) |
| - (p_sed_4_irred_ims)*(26.5*rfr_pc_enrichment_det)/(cgt_cellheight*cgt_density)    | recycling of sedimentary detritus to ammonium using iron hydroxide (iron reduction) |
| - (p_sed_5_irred_ims)*(26.5*rfr_pc_enrichment_det)/(cgt_cellheight*cgt_density)    | recycling of sedimentary detritus to ammonium using iron hydroxide (iron reduction) |
| - (p_sed_6_irred_ims)*(26.5*rfr_pc_enrichment_det)/(cgt_cellheight*cgt_density)    | recycling of sedimentary detritus to ammonium using iron hydroxide (iron reduction) |
| - (p_sed_1_irredips_ims)*(26.5*rfr_pc_enrichment_det)/(cgt_cellheight*cgt_density) | recycling of sedimentary detritus to ammonium using iron phosphate (iron reduction) |
| - (p_sed_2_irredips_ims)*(26.5*rfr_pc_enrichment_det)/(cgt_cellheight*cgt_density) | recycling of sedimentary detritus to ammonium using iron phosphate (iron reduction) |
| - (p_sed_3_irredips_ims)*(26.5*rfr_pc_enrichment_det)/(cgt_cellheight*cgt_density) | recycling of sedimentary detritus to ammonium using iron phosphate (iron reduction) |
| - (p_sed_4_irredips_ims)*(26.5*rfr_pc_enrichment_det)/(cgt_cellheight*cgt_density) | recycling of sedimentary detritus to ammonium using iron phosphate (iron reduction) |
| - (p_sed_5_irredips_ims)*(26.5*rfr_pc_enrichment_det)/(cgt_cellheight*cgt_density) | recycling of sedimentary detritus to ammonium using iron phosphate (iron reduction) |

continued on next page...

## Tracer equations, continued from previous page

```

- (p_sed_6_irredips_ims)*      recycling of sedimentary detritus to ammonium
(26.5*rfr_pc_enrichment_det)  using iron phosphate (iron reduction)
/(cgt_cellheight*cgt_density)

-                               reduction of sedimentary iron hydroxide to
p_ihs_red_iim/(cgt_cellheight*iron-II
cgt_density)

- (p_ihs_red_ims)*(9.0)        reduction of sedimentary iron hydroxide to
/(cgt_cellheight*cgt_density) iron-II

-                               precipitation of iron II as siderite
p_fe2_prec_ims/(cgt_cellheight
cgt_density)

-                               minnesotaite transformation to iron
p_iim_trans_ims/(cgt_cellheightmonosulfide
cgt_density)

- (p_ims_form2_pyr)*(0.75)     pyrite formation from iron monosulfide
/(cgt_cellheight*cgt_density)

-                               reduction of iron-III in clay minerals to iron-II
p_i3i_redh2s_i2i/(cgt_cellheightconsuming h2s
cgt_density)

-                               reduction of sedimentary iron hydroxide to
p_ihc_red_iim/(cgt_cellheight*iron-II
cgt_density)

- (p_ihc_red_ims)*(9.0)        reduction of sedimentary iron hydroxide to
/(cgt_cellheight*cgt_density) iron-II

- (p_h2s_mnox_so4)*(0.25)      oxidation of h2s by reduction of MnO2
/(cgt_cellheight*cgt_density)

```

## Change of: sulfur

```

 $\frac{d}{dt} t_{sul} =$ 
+ p_h2s_oxo2_sul              oxidation of hydrogen sulfide with oxygen
+ p_h2s_oxno3_sul             oxidation of hydrogen sulfide with nitrate
- p_sul_oxo2_so4              oxidation of elemental sulfur with oxygen

```

continued on next page...

## Tracer equations, continued from previous page

|                   |                                            |
|-------------------|--------------------------------------------|
| - p_sul_oxno3_so4 | oxidation of elemental sulfur with nitrate |
|-------------------|--------------------------------------------|

## Change of: total alkalinity

$$\frac{d}{dt} t_{\text{alk}} =$$

|                                                                                           |                                                                                                        |
|-------------------------------------------------------------------------------------------|--------------------------------------------------------------------------------------------------------|
| + (1)*(p_po4_ads_ips)*(3)<br>/(cgt_cellheight*cgt_density)                                | adsorption of phosphate to iron hydroxide particles (produces ohminus)                                 |
| + (1)*(p_po4_ads_ipw)*(3)                                                                 | adsorption of phosphate to iron hydroxide particles (produces ohminus)                                 |
| + (1)*(p_iim_diss_fe2)*(2)<br>/(cgt_cellheight*cgt_density)                               | dissolution minnesotaite to of iron-II (produces ohminus)                                              |
| + (1)*(p_stf_alk)                                                                         | relax alkalinity to default value to compensate for detritus removal (produces ohminus)                |
| + (1)*(p_alk_rise_ohmdiff)                                                                | rise of total alkalinity by quicker-than-assumed diffusion of OH- (produces ohminus)                   |
| + (1)*(p_aim_lib_nh4)<br>/(cgt_cellheight*cgt_density)                                    | ammonium liberation from illite-montmorillonite mixed layer minerals (produces ohminus)                |
| - (1)*(p_sed_1_irred_iim)*<br>(53*rfr_pc_enrichment_det)<br>/(cgt_cellheight*cgt_density) | recycling of sedimentary detritus to ammonium using iron hydroxide (iron reduction) (consumes ohminus) |
| - (1)*(p_sed_2_irred_iim)*<br>(53*rfr_pc_enrichment_det)<br>/(cgt_cellheight*cgt_density) | recycling of sedimentary detritus to ammonium using iron hydroxide (iron reduction) (consumes ohminus) |
| - (1)*(p_sed_3_irred_iim)*<br>(53*rfr_pc_enrichment_det)<br>/(cgt_cellheight*cgt_density) | recycling of sedimentary detritus to ammonium using iron hydroxide (iron reduction) (consumes ohminus) |
| - (1)*(p_sed_4_irred_iim)*<br>(53*rfr_pc_enrichment_det)<br>/(cgt_cellheight*cgt_density) | recycling of sedimentary detritus to ammonium using iron hydroxide (iron reduction) (consumes ohminus) |
| - (1)*(p_sed_5_irred_iim)*<br>(53*rfr_pc_enrichment_det)<br>/(cgt_cellheight*cgt_density) | recycling of sedimentary detritus to ammonium using iron hydroxide (iron reduction) (consumes ohminus) |

continued on next page...

## Tracer equations, continued from previous page

- (1)\*(p\_sed\_6\_irred\_iim)\* recycling of sedimentary detritus to ammonium  
(53\*rfr\_pc\_enrichment\_det) using iron hydroxide (iron reduction)  
/(cgt\_cellheight\*cgt\_density) (consumes ohminus)
- (1)\*(p\_sed\_1\_irredips\_iim)\* recycling of sedimentary detritus to ammonium  
(53\*rfr\_pc\_enrichment\_det) using iron hydroxide (iron reduction)  
/(cgt\_cellheight\*cgt\_density) (consumes ohminus)
- (1)\*(p\_sed\_2\_irredips\_iim)\* recycling of sedimentary detritus to ammonium  
(53\*rfr\_pc\_enrichment\_det) using iron hydroxide (iron reduction)  
/(cgt\_cellheight\*cgt\_density) (consumes ohminus)
- (1)\*(p\_sed\_3\_irredips\_iim)\* recycling of sedimentary detritus to ammonium  
(53\*rfr\_pc\_enrichment\_det) using iron hydroxide (iron reduction)  
/(cgt\_cellheight\*cgt\_density) (consumes ohminus)
- (1)\*(p\_sed\_4\_irredips\_iim)\* recycling of sedimentary detritus to ammonium  
(53\*rfr\_pc\_enrichment\_det) using iron hydroxide (iron reduction)  
/(cgt\_cellheight\*cgt\_density) (consumes ohminus)
- (1)\*(p\_sed\_5\_irredips\_iim)\* recycling of sedimentary detritus to ammonium  
(53\*rfr\_pc\_enrichment\_det) using iron hydroxide (iron reduction)  
/(cgt\_cellheight\*cgt\_density) (consumes ohminus)
- (1)\*(p\_sed\_6\_irredips\_iim)\* recycling of sedimentary detritus to ammonium  
(53\*rfr\_pc\_enrichment\_det) using iron hydroxide (iron reduction)  
/(cgt\_cellheight\*cgt\_density) (consumes ohminus)
- (1)\*(p\_ips\_diss\_po4)\*(3) dissolution of iron phosphate (consumes  
/(cgt\_cellheight\*cgt\_density) ohminus)
- (1)\*(p\_ipw\_diss\_po4)\*(3) dissolution of iron phosphate (consumes  
ohminus)
- (1)\*(p\_fe2\_prec\_ims)\*(2.0) precipitation of iron II as siderite (consumes  
/(cgt\_cellheight\*cgt\_density) ohminus)
- (1)\*(p\_fe2\_prec\_iim)\*(2) precipitation of iron II as minnesotaite  
/(cgt\_cellheight\*cgt\_density) (consumes ohminus)
- (1)\*(p\_stf\_alk\_up) relax alkalinity to default value to compensate  
for detritus removal (consumes ohminus)

continued on next page...

| Tracer equations, continued from previous page                                                           |                                                                                                        |
|----------------------------------------------------------------------------------------------------------|--------------------------------------------------------------------------------------------------------|
| $-(1)*(p\_nh4\_ads\_aim) / (cgt\_cellheight*cgt\_density)$                                               | ammonium adsorption to illite-montmorillonite mixed layer minerals (consumes ohminus)                  |
| $+( -1)*(p\_nh4\_assim\_lpp)*(0.8125)$                                                                   | assimilation of ammonium by large-cell phytoplankton (produces h3oplus)                                |
| $+( -1)*(p\_nh4\_assim\_spp)*(0.8125)$                                                                   | assimilation of ammonium by small-cell phytoplankton (produces h3oplus)                                |
| $+( -1)*(p\_nh4\_nit\_no3)*(2)$                                                                          | nitrification (produces h3oplus)                                                                       |
| $+( -1)*(p\_nh4\_nit\_no3\_sed)*(2)$                                                                     | nitrification in the sediment (produces h3oplus)                                                       |
| $+( -1)*(p\_sul\_oxo2\_so4)*(2)$                                                                         | oxidation of elemental sulfur with oxygen (produces h3oplus)                                           |
| $+( -1)*(p\_sul\_oxno3\_so4)*(0.8)$                                                                      | oxidation of elemental sulfur with nitrate (produces h3oplus)                                          |
| $+( -1)*(p\_det\_1\_resp\_nh4)*(0)$                                                                      | recycling of detritus to ammonium using oxygen (respiration) (produces h3oplus)                        |
| $+( -1)*(p\_det\_2\_resp\_nh4)*(0)$                                                                      | recycling of detritus to ammonium using oxygen (respiration) (produces h3oplus)                        |
| $+( -1)*(p\_det\_3\_resp\_nh4)*(0)$                                                                      | recycling of detritus to ammonium using oxygen (respiration) (produces h3oplus)                        |
| $+( -1)*(p\_det\_4\_resp\_nh4)*(0)$                                                                      | recycling of detritus to ammonium using oxygen (respiration) (produces h3oplus)                        |
| $+( -1)*(p\_det\_5\_resp\_nh4)*(0)$                                                                      | recycling of detritus to ammonium using oxygen (respiration) (produces h3oplus)                        |
| $+( -1)*(p\_det\_6\_resp\_nh4)*(0)$                                                                      | recycling of detritus to ammonium using oxygen (respiration) (produces h3oplus)                        |
| $+( -1)*(p\_fe2\_ox\_ihs)*(2) / (cgt\_cellheight*cgt\_density)$                                          | oxidation of Fe <sup>2+</sup> to iron hydroxide in the sediment (produces h3oplus)                     |
| $+( -1)*(p\_fe2\_ox\_ihw)*(2)$                                                                           | oxidation of Fe <sup>2+</sup> to iron hydroxide in the sediment (produces h3oplus)                     |
| $+( -1)*(p\_sed\_1\_irredips\_ims)*(238.6875*rfr\_pc\_enrichment\_det) / (cgt\_cellheight*cgt\_density)$ | recycling of sedimentary detritus to ammonium using iron phosphate (iron reduction) (produces h3oplus) |
| continued on next page...                                                                                |                                                                                                        |

## Tracer equations, continued from previous page

```

+ (-1)*(p_sed_2_irredips_ims) recycling of sedimentary detritus to ammonium
*(238.6875* using iron phosphate (iron reduction)
rfr_pc_enrichment_det) (produces h3oplus)
/(cgt_cellheight*cgt_density)

+ (-1)*(p_sed_3_irredips_ims) recycling of sedimentary detritus to ammonium
*(238.6875* using iron phosphate (iron reduction)
rfr_pc_enrichment_det) (produces h3oplus)
/(cgt_cellheight*cgt_density)

+ (-1)*(p_sed_4_irredips_ims) recycling of sedimentary detritus to ammonium
*(238.6875* using iron phosphate (iron reduction)
rfr_pc_enrichment_det) (produces h3oplus)
/(cgt_cellheight*cgt_density)

+ (-1)*(p_sed_5_irredips_ims) recycling of sedimentary detritus to ammonium
*(238.6875* using iron phosphate (iron reduction)
rfr_pc_enrichment_det) (produces h3oplus)
/(cgt_cellheight*cgt_density)

+ (-1)*(p_sed_6_irredips_ims) recycling of sedimentary detritus to ammonium
*(238.6875* using iron phosphate (iron reduction)
rfr_pc_enrichment_det) (produces h3oplus)
/(cgt_cellheight*cgt_density)

+ (-1)*(p_sed_1_irredips_iim) recycling of sedimentary detritus to ammonium
*(79.5*rfr_pc_enrichment_det) using iron hydroxide (iron reduction) (produces
/(cgt_cellheight*cgt_density) h3oplus)

+ (-1)*(p_sed_2_irredips_iim) recycling of sedimentary detritus to ammonium
*(79.5*rfr_pc_enrichment_det) using iron hydroxide (iron reduction) (produces
/(cgt_cellheight*cgt_density) h3oplus)

+ (-1)*(p_sed_3_irredips_iim) recycling of sedimentary detritus to ammonium
*(79.5*rfr_pc_enrichment_det) using iron hydroxide (iron reduction) (produces
/(cgt_cellheight*cgt_density) h3oplus)

+ (-1)*(p_sed_4_irredips_iim) recycling of sedimentary detritus to ammonium
*(79.5*rfr_pc_enrichment_det) using iron hydroxide (iron reduction) (produces
/(cgt_cellheight*cgt_density) h3oplus)

+ (-1)*(p_sed_5_irredips_iim) recycling of sedimentary detritus to ammonium
*(79.5*rfr_pc_enrichment_det) using iron hydroxide (iron reduction) (produces
/(cgt_cellheight*cgt_density) h3oplus)

```

continued on next page...

## Tracer equations, continued from previous page

```

+ (-1)*(p_sed_6_irredips_iim) recycling of sedimentary detritus to ammonium
*(79.5*rfr_pc_enrichment_det) using iron hydroxide (iron reduction) (produces
/(cgt_cellheight*cgt_density) h3oplus)

+ (-1)*(p_ihs_red_iim)*(2.0) reduction of sedimentary iron hydroxide to
/(cgt_cellheight*cgt_density) iron-II (produces h3oplus)

+ (-1)*(p_ihs_red_ims)*(2.0) reduction of sedimentary iron hydroxide to
/(cgt_cellheight*cgt_density) iron-II (produces h3oplus)

+ (-1)*(p_mn2_ox_mos)*(2) oxidation of Mn2+ to manganese oxide in the
/(cgt_cellheight*cgt_density) sediment (produces h3oplus)

+ (-1)*(p_alk_fall_ohmdiff) falling of total alkalinity by quicker-than-
assumed diffusion of OH- (produces h3oplus)

+ (-1)*(p_pyr_oxo2_ihs)*(0.5) oxidation of pyrite by manganese oxide to iron
/(cgt_cellheight*cgt_density) oxyhydroxide (produces h3oplus)

+ (-1)*(p_i3i_redh2s_i2i)*(2) reduction of iron-III in clay minerals to iron-II
/(cgt_cellheight*cgt_density) consuming h2s (produces h3oplus)

+ (-1)*(p_ihc_red_iim)*(2.0) reduction of sedimentary iron hydroxide to
/(cgt_cellheight*cgt_density) iron-II (produces h3oplus)

+ (-1)*(p_ihc_red_ims)*(2.0) reduction of sedimentary iron hydroxide to
/(cgt_cellheight*cgt_density) iron-II (produces h3oplus)

+ (-1)*(p_pim_lib_po4)*(3) phosphate liberation from illite-
/(cgt_cellheight*cgt_density) montmorillonite mixed layer minerals
(produces h3oplus)

+ (-1)*(p_aim_nit_no3_sed) nitrification in the sediment (produces h3oplus)
/(cgt_cellheight*cgt_density)

+ (-1)*(p_fe2_mnox_ihs)*(2.0) oxidation of Fe2+ by reduction of MnO2
/(cgt_cellheight*cgt_density) (produces h3oplus)

+ (-1)*(p_ims_oxo2_ihs)*(2) iron monosulfide oxidation to iron
/(cgt_cellheight*cgt_density) oxihydroxides (produces h3oplus)

+ (-1)*(p_detp_1_remin_po4)* recycling of detritus to ammonium using
(3*rfr_pc_enrichment_det* oxygen (respiration) (produces h3oplus)
rfr_p)

```

continued on next page...



## Tracer equations, continued from previous page

|                                                                                                                        |                                                                                    |
|------------------------------------------------------------------------------------------------------------------------|------------------------------------------------------------------------------------|
| $+ (-1)*(p\_detp\_2\_remin\_po4)*$<br>$(3*rfr\_pc\_enrichment\_det*$<br>$rfr\_p)$                                      | recycling of detritus to ammonium using<br>oxygen (respiration) (produces h3oplus) |
| $+ (-1)*(p\_detp\_3\_remin\_po4)*$<br>$(3*rfr\_pc\_enrichment\_det*$<br>$rfr\_p)$                                      | recycling of detritus to ammonium using<br>oxygen (respiration) (produces h3oplus) |
| $+ (-1)*(p\_detp\_4\_remin\_po4)*$<br>$(3*rfr\_pc\_enrichment\_det*$<br>$rfr\_p)$                                      | recycling of detritus to ammonium using<br>oxygen (respiration) (produces h3oplus) |
| $+ (-1)*(p\_detp\_5\_remin\_po4)*$<br>$(3*rfr\_pc\_enrichment\_det*$<br>$rfr\_p)$                                      | recycling of detritus to ammonium using<br>oxygen (respiration) (produces h3oplus) |
| $+ (-1)*(p\_detp\_6\_remin\_po4)*$<br>$(3*rfr\_pc\_enrichment\_det*$<br>$rfr\_p)$                                      | recycling of detritus to ammonium using<br>oxygen (respiration) (produces h3oplus) |
| $+ (-1)*(p\_sedp\_1\_remin\_po4)*$<br>$(3*rfr\_pc\_enrichment\_det*$<br>$rfr\_p)/(cgt\_cellheight*$<br>$cgt\_density)$ | recycling of sediment detrital phosphate<br>(produces h3oplus)                     |
| $+ (-1)*(p\_sedp\_2\_remin\_po4)*$<br>$(3*rfr\_pc\_enrichment\_det*$<br>$rfr\_p)/(cgt\_cellheight*$<br>$cgt\_density)$ | recycling of sediment detrital phosphate<br>(produces h3oplus)                     |
| $+ (-1)*(p\_sedp\_3\_remin\_po4)*$<br>$(3*rfr\_pc\_enrichment\_det*$<br>$rfr\_p)/(cgt\_cellheight*$<br>$cgt\_density)$ | recycling of sediment detrital phosphate<br>(produces h3oplus)                     |
| $+ (-1)*(p\_sedp\_4\_remin\_po4)*$<br>$(3*rfr\_pc\_enrichment\_det*$<br>$rfr\_p)/(cgt\_cellheight*$<br>$cgt\_density)$ | recycling of sediment detrital phosphate<br>(produces h3oplus)                     |
| $+ (-1)*(p\_sedp\_5\_remin\_po4)*$<br>$(3*rfr\_pc\_enrichment\_det*$<br>$rfr\_p)/(cgt\_cellheight*$<br>$cgt\_density)$ | recycling of sediment detrital phosphate<br>(produces h3oplus)                     |

continued on next page...

## Tracer equations, continued from previous page

```

+ (-1)*(p_sedp_6_remin_po4)* recycling of sediment detrital phosphate
(3*rfr_pc_enrichment_det* (produces h3oplus)
rfr_p)/(cgt_cellheight*
cgt_density)

+ (-1)*(p_mn2_prec_rho)*(3.2) manganese-II precipitation to rhodochrosite
/(cgt_cellheight*cgt_density) (produces h3oplus)

+ (-1)* parameterization for recycling of sedimentary
(p_sedp_1_sulfdeep_po4)*(3* detritus to ammonium below the deepest
rfr_pc_enrichment_det*rfr_p) sediment layer (sulfate reduction / methane
/(cgt_cellheight*cgt_density) formation) (produces h3oplus)

+ (-1)* parameterization for recycling of sedimentary
(p_sedp_2_sulfdeep_po4)*(3* detritus to ammonium below the deepest
rfr_pc_enrichment_det*rfr_p) sediment layer (sulfate reduction / methane
/(cgt_cellheight*cgt_density) formation) (produces h3oplus)

+ (-1)* parameterization for recycling of sedimentary
(p_sedp_3_sulfdeep_po4)*(3* detritus to ammonium below the deepest
rfr_pc_enrichment_det*rfr_p) sediment layer (sulfate reduction / methane
/(cgt_cellheight*cgt_density) formation) (produces h3oplus)

+ (-1)* parameterization for recycling of sedimentary
(p_sedp_4_sulfdeep_po4)*(3* detritus to ammonium below the deepest
rfr_pc_enrichment_det*rfr_p) sediment layer (sulfate reduction / methane
/(cgt_cellheight*cgt_density) formation) (produces h3oplus)

+ (-1)* parameterization for recycling of sedimentary
(p_sedp_5_sulfdeep_po4)*(3* detritus to ammonium below the deepest
rfr_pc_enrichment_det*rfr_p) sediment layer (sulfate reduction / methane
/(cgt_cellheight*cgt_density) formation) (produces h3oplus)

+ (-1)* parameterization for recycling of sedimentary
(p_sedp_6_sulfdeep_po4)*(3* detritus to ammonium below the deepest
rfr_pc_enrichment_det*rfr_p) sediment layer (sulfate reduction / methane
/(cgt_cellheight*cgt_density) formation) (produces h3oplus)

+ (-1)*(p_pyr_biores_ihw)* bio resuspension of pyrite (produces h3oplus)
(0.25)/(cgt_cellheight*
cgt_density)

```

continued on next page...

## Tracer equations, continued from previous page

|                                                                                |                                                                        |
|--------------------------------------------------------------------------------|------------------------------------------------------------------------|
| $+ (-1) * (p\_pyr\_ero\_ihw) * (0.25) / (cgt\_cellheight * cgt\_density)$      | resuspension of pyrite (produces h3oplus)                              |
| $- (-1) * (p\_no3\_assim\_lpp) * (1.1875)$                                     | assimilation of nitrate by large-cell phytoplankton (consumes h3oplus) |
| $- (-1) * (p\_no3\_assim\_spp) * (1.1875)$                                     | assimilation of nitrate by small-cell phytoplankton (consumes h3oplus) |
| $- (-1) * (p\_n2\_assim\_cya) * (0.1875)$                                      | fixation of dinitrogen by diazotroph cyanobacteria (consumes h3oplus)  |
| $- (-1) * (p\_lpp\_resp\_nh4) * (0.8125)$                                      | respiration of large-cell phytoplankton (consumes h3oplus)             |
| $- (-1) * (p\_spp\_resp\_nh4) * (0.8125)$                                      | respiration of small-cell phytoplankton (consumes h3oplus)             |
| $- (-1) * (p\_cya\_resp\_nh4) * (0.8125)$                                      | respiration of diazotroph cyanobacteria (consumes h3oplus)             |
| $- (-1) * (p\_zoo\_resp\_nh4) * (0.8125)$                                      | respiration of zooplankton (consumes h3oplus)                          |
| $- (-1) * (p\_lpp\_mort\_det\_1) * ((1.0 - (1.0 / rfr\_pc\_enrichment\_det)))$ | mortality of large-cell phytoplankton (consumes h3oplus)               |
| $- (-1) * (p\_lpp\_mort\_det\_2) * ((1.0 - (1.0 / rfr\_pc\_enrichment\_det)))$ | mortality of large-cell phytoplankton (consumes h3oplus)               |
| $- (-1) * (p\_lpp\_mort\_det\_3) * ((1.0 - (1.0 / rfr\_pc\_enrichment\_det)))$ | mortality of large-cell phytoplankton (consumes h3oplus)               |
| $- (-1) * (p\_lpp\_mort\_det\_4) * ((1.0 - (1.0 / rfr\_pc\_enrichment\_det)))$ | mortality of large-cell phytoplankton (consumes h3oplus)               |
| $- (-1) * (p\_lpp\_mort\_det\_5) * ((1.0 - (1.0 / rfr\_pc\_enrichment\_det)))$ | mortality of large-cell phytoplankton (consumes h3oplus)               |

continued on next page...

## Tracer equations, continued from previous page

```

- (-1)*(p_lpp_mort_det_6)*      mortality of large-cell phytoplankton
((1.0-                           (consumes h3oplus)
(1.0/rfr_pc_enrichment_det)))

- (-1)*(p_spp_mort_det_1)*      mortality of small-scale phytoplankton
((1.0-                           (consumes h3oplus)
(1.0/rfr_pc_enrichment_det)))

- (-1)*(p_spp_mort_det_2)*      mortality of small-scale phytoplankton
((1.0-                           (consumes h3oplus)
(1.0/rfr_pc_enrichment_det)))

- (-1)*(p_spp_mort_det_3)*      mortality of small-scale phytoplankton
((1.0-                           (consumes h3oplus)
(1.0/rfr_pc_enrichment_det)))

- (-1)*(p_spp_mort_det_4)*      mortality of small-scale phytoplankton
((1.0-                           (consumes h3oplus)
(1.0/rfr_pc_enrichment_det)))

- (-1)*(p_spp_mort_det_5)*      mortality of small-scale phytoplankton
((1.0-                           (consumes h3oplus)
(1.0/rfr_pc_enrichment_det)))

- (-1)*(p_spp_mort_det_6)*      mortality of small-scale phytoplankton
((1.0-                           (consumes h3oplus)
(1.0/rfr_pc_enrichment_det)))

- (-1)*(p_cya_mort_det_1)*      mortality of diazotroph cyanobacteria
((1.0-                           (consumes h3oplus)
(1.0/rfr_pc_enrichment_det)))

- (-1)*(p_cya_mort_det_2)*      mortality of diazotroph cyanobacteria
((1.0-                           (consumes h3oplus)
(1.0/rfr_pc_enrichment_det)))

- (-1)*(p_cya_mort_det_3)*      mortality of diazotroph cyanobacteria
((1.0-                           (consumes h3oplus)
(1.0/rfr_pc_enrichment_det)))

- (-1)*(p_cya_mort_det_4)*      mortality of diazotroph cyanobacteria
((1.0-                           (consumes h3oplus)
(1.0/rfr_pc_enrichment_det)))

```

continued on next page...

## Tracer equations, continued from previous page

- $(-1) \cdot (p\_cya\_mort\_det\_5) \cdot ((1.0 - (1.0/rfr\_pc\_enrichment\_det)))$  mortality of diazotroph cyanobacteria (consumes h3oplus)
- $(-1) \cdot (p\_cya\_mort\_det\_6) \cdot ((1.0 - (1.0/rfr\_pc\_enrichment\_det)))$  mortality of diazotroph cyanobacteria (consumes h3oplus)
- $(-1) \cdot (p\_zoo\_mort\_det\_1) \cdot ((1.0 - (1.0/rfr\_pc\_enrichment\_det)))$  mortality of zooplankton (consumes h3oplus)
- $(-1) \cdot (p\_zoo\_mort\_det\_2) \cdot ((1.0 - (1.0/rfr\_pc\_enrichment\_det)))$  mortality of zooplankton (consumes h3oplus)
- $(-1) \cdot (p\_zoo\_mort\_det\_3) \cdot ((1.0 - (1.0/rfr\_pc\_enrichment\_det)))$  mortality of zooplankton (consumes h3oplus)
- $(-1) \cdot (p\_zoo\_mort\_det\_4) \cdot ((1.0 - (1.0/rfr\_pc\_enrichment\_det)))$  mortality of zooplankton (consumes h3oplus)
- $(-1) \cdot (p\_zoo\_mort\_det\_5) \cdot ((1.0 - (1.0/rfr\_pc\_enrichment\_det)))$  mortality of zooplankton (consumes h3oplus)
- $(-1) \cdot (p\_zoo\_mort\_det\_6) \cdot ((1.0 - (1.0/rfr\_pc\_enrichment\_det)))$  mortality of zooplankton (consumes h3oplus)
- $(-1) \cdot (p\_sed\_1\_resp\_nh4) / (cgt\_cellheight \cdot cgt\_density)$  recycling of sedimentary detritus to ammonium using oxygen (respiration) (consumes h3oplus)
- $(-1) \cdot (p\_sed\_2\_resp\_nh4) / (cgt\_cellheight \cdot cgt\_density)$  recycling of sedimentary detritus to ammonium using oxygen (respiration) (consumes h3oplus)
- $(-1) \cdot (p\_sed\_3\_resp\_nh4) / (cgt\_cellheight \cdot cgt\_density)$  recycling of sedimentary detritus to ammonium using oxygen (respiration) (consumes h3oplus)
- $(-1) \cdot (p\_sed\_4\_resp\_nh4) / (cgt\_cellheight \cdot cgt\_density)$  recycling of sedimentary detritus to ammonium using oxygen (respiration) (consumes h3oplus)

continued on next page...

## Tracer equations, continued from previous page

|                                                                                                          |                                                                                                    |
|----------------------------------------------------------------------------------------------------------|----------------------------------------------------------------------------------------------------|
| $- (-1)*(p\_sed\_5\_resp\_nh4) / (cgt\_cellheight*cgt\_density)$                                         | recycling of sedimentary detritus to ammonium using oxygen (respiration) (consumes h3oplus)        |
| $- (-1)*(p\_sed\_6\_resp\_nh4) / (cgt\_cellheight*cgt\_density)$                                         | recycling of sedimentary detritus to ammonium using oxygen (respiration) (consumes h3oplus)        |
| $- (-1)*(p\_sed\_1\_denit\_nh4)* ((1.0+5.3*rfr\_pc\_enrichment\_det)) / (cgt\_cellheight*cgt\_density)$  | recycling of sedimentary detritus to ammonium using nitrate (denitrification) (consumes h3oplus)   |
| $- (-1)*(p\_sed\_2\_denit\_nh4)* ((1.0+5.3*rfr\_pc\_enrichment\_det)) / (cgt\_cellheight*cgt\_density)$  | recycling of sedimentary detritus to ammonium using nitrate (denitrification) (consumes h3oplus)   |
| $- (-1)*(p\_sed\_3\_denit\_nh4)* ((1.0+5.3*rfr\_pc\_enrichment\_det)) / (cgt\_cellheight*cgt\_density)$  | recycling of sedimentary detritus to ammonium using nitrate (denitrification) (consumes h3oplus)   |
| $- (-1)*(p\_sed\_4\_denit\_nh4)* ((1.0+5.3*rfr\_pc\_enrichment\_det)) / (cgt\_cellheight*cgt\_density)$  | recycling of sedimentary detritus to ammonium using nitrate (denitrification) (consumes h3oplus)   |
| $- (-1)*(p\_sed\_5\_denit\_nh4)* ((1.0+5.3*rfr\_pc\_enrichment\_det)) / (cgt\_cellheight*cgt\_density)$  | recycling of sedimentary detritus to ammonium using nitrate (denitrification) (consumes h3oplus)   |
| $- (-1)*(p\_sed\_6\_denit\_nh4)* ((1.0+5.3*rfr\_pc\_enrichment\_det)) / (cgt\_cellheight*cgt\_density)$  | recycling of sedimentary detritus to ammonium using nitrate (denitrification) (consumes h3oplus)   |
| $- (-1)*(p\_sed\_1\_sulf\_nh4)* ((1.0+rfr\_pc\_enrichment\_det*6.625)) / (cgt\_cellheight*cgt\_density)$ | recycling of sedimentary detritus to ammonium using sulfate (sulfate reduction) (consumes h3oplus) |
| $- (-1)*(p\_sed\_2\_sulf\_nh4)* ((1.0+rfr\_pc\_enrichment\_det*6.625)) / (cgt\_cellheight*cgt\_density)$ | recycling of sedimentary detritus to ammonium using sulfate (sulfate reduction) (consumes h3oplus) |

continued on next page...

## Tracer equations, continued from previous page

|                                                                                                        |                                                                                                          |
|--------------------------------------------------------------------------------------------------------|----------------------------------------------------------------------------------------------------------|
| - (-1)*(p_sed_3_sulf_nh4)*<br>((1.0+rfr_pc_enrichment_det*<br>6.625))/(cgt_cellheight*<br>cgt_density) | recycling of sedimentary detritus to ammonium<br>using sulfate (sulfate reduction) (consumes<br>h3oplus) |
| - (-1)*(p_sed_4_sulf_nh4)*<br>((1.0+rfr_pc_enrichment_det*<br>6.625))/(cgt_cellheight*<br>cgt_density) | recycling of sedimentary detritus to ammonium<br>using sulfate (sulfate reduction) (consumes<br>h3oplus) |
| - (-1)*(p_sed_5_sulf_nh4)*<br>((1.0+rfr_pc_enrichment_det*<br>6.625))/(cgt_cellheight*<br>cgt_density) | recycling of sedimentary detritus to ammonium<br>using sulfate (sulfate reduction) (consumes<br>h3oplus) |
| - (-1)*(p_sed_6_sulf_nh4)*<br>((1.0+rfr_pc_enrichment_det*<br>6.625))/(cgt_cellheight*<br>cgt_density) | recycling of sedimentary detritus to ammonium<br>using sulfate (sulfate reduction) (consumes<br>h3oplus) |
| - (-1)*(p_h2s_oxno3_sul)*<br>(0.4)                                                                     | oxidation of hydrogen sulfide with nitrate<br>(consumes h3oplus)                                         |
| - (-1)*(p_det_1_resp_nh4)                                                                              | recycling of detritus to ammonium using<br>oxygen (respiration) (consumes h3oplus)                       |
| - (-1)*(p_det_2_resp_nh4)                                                                              | recycling of detritus to ammonium using<br>oxygen (respiration) (consumes h3oplus)                       |
| - (-1)*(p_det_3_resp_nh4)                                                                              | recycling of detritus to ammonium using<br>oxygen (respiration) (consumes h3oplus)                       |
| - (-1)*(p_det_4_resp_nh4)                                                                              | recycling of detritus to ammonium using<br>oxygen (respiration) (consumes h3oplus)                       |
| - (-1)*(p_det_5_resp_nh4)                                                                              | recycling of detritus to ammonium using<br>oxygen (respiration) (consumes h3oplus)                       |
| - (-1)*(p_det_6_resp_nh4)                                                                              | recycling of detritus to ammonium using<br>oxygen (respiration) (consumes h3oplus)                       |
| - (-1)*(p_det_1_denit_nh4)*<br>((1.0+5.3*<br>rfr_pc_enrichment_det))                                   | recycling of detritus to ammonium using<br>nitrate (denitrification) (consumes h3oplus)                  |

continued on next page...

## Tracer equations, continued from previous page

|                                                                       |                                                                                                          |
|-----------------------------------------------------------------------|----------------------------------------------------------------------------------------------------------|
| - (-1)*(p_det_2_denit_nh4)*<br>((1.0+5.3*<br>rfr_pc_enrichment_det))  | recycling of detritus to ammonium using<br>nitrate (denitrification) (consumes h3oplus)                  |
| - (-1)*(p_det_3_denit_nh4)*<br>((1.0+5.3*<br>rfr_pc_enrichment_det))  | recycling of detritus to ammonium using<br>nitrate (denitrification) (consumes h3oplus)                  |
| - (-1)*(p_det_4_denit_nh4)*<br>((1.0+5.3*<br>rfr_pc_enrichment_det))  | recycling of detritus to ammonium using<br>nitrate (denitrification) (consumes h3oplus)                  |
| - (-1)*(p_det_5_denit_nh4)*<br>((1.0+5.3*<br>rfr_pc_enrichment_det))  | recycling of detritus to ammonium using<br>nitrate (denitrification) (consumes h3oplus)                  |
| - (-1)*(p_det_6_denit_nh4)*<br>((1.0+5.3*<br>rfr_pc_enrichment_det))  | recycling of detritus to ammonium using<br>nitrate (denitrification) (consumes h3oplus)                  |
| - (-1)*(p_det_1_sulf_nh4)*<br>((1.0+rfr_pc_enrichment_det*<br>6.625)) | recycling of sedimentary detritus to ammonium<br>using sulfate (sulfate reduction) (consumes<br>h3oplus) |
| - (-1)*(p_det_2_sulf_nh4)*<br>((1.0+rfr_pc_enrichment_det*<br>6.625)) | recycling of sedimentary detritus to ammonium<br>using sulfate (sulfate reduction) (consumes<br>h3oplus) |
| - (-1)*(p_det_3_sulf_nh4)*<br>((1.0+rfr_pc_enrichment_det*<br>6.625)) | recycling of sedimentary detritus to ammonium<br>using sulfate (sulfate reduction) (consumes<br>h3oplus) |
| - (-1)*(p_det_4_sulf_nh4)*<br>((1.0+rfr_pc_enrichment_det*<br>6.625)) | recycling of sedimentary detritus to ammonium<br>using sulfate (sulfate reduction) (consumes<br>h3oplus) |
| - (-1)*(p_det_5_sulf_nh4)*<br>((1.0+rfr_pc_enrichment_det*<br>6.625)) | recycling of sedimentary detritus to ammonium<br>using sulfate (sulfate reduction) (consumes<br>h3oplus) |
| - (-1)*(p_det_6_sulf_nh4)*<br>((1.0+rfr_pc_enrichment_det*<br>6.625)) | recycling of sedimentary detritus to ammonium<br>using sulfate (sulfate reduction) (consumes<br>h3oplus) |

continued on next page. . .



## Tracer equations, continued from previous page

|                                                                                                                   |                                                                                                              |
|-------------------------------------------------------------------------------------------------------------------|--------------------------------------------------------------------------------------------------------------|
| $- (-1) * (p\_sed\_1\_mnred\_mn2) * ((1.0 + 26.5 * rfr\_pc\_enrichment\_det)) / (cgt\_cellheight * cgt\_density)$ | recycling of sedimentary detritus to ammonium using manganese oxide (manganese reduction) (consumes h3oplus) |
| $- (-1) * (p\_sed\_2\_mnred\_mn2) * ((1.0 + 26.5 * rfr\_pc\_enrichment\_det)) / (cgt\_cellheight * cgt\_density)$ | recycling of sedimentary detritus to ammonium using manganese oxide (manganese reduction) (consumes h3oplus) |
| $- (-1) * (p\_sed\_3\_mnred\_mn2) * ((1.0 + 26.5 * rfr\_pc\_enrichment\_det)) / (cgt\_cellheight * cgt\_density)$ | recycling of sedimentary detritus to ammonium using manganese oxide (manganese reduction) (consumes h3oplus) |
| $- (-1) * (p\_sed\_4\_mnred\_mn2) * ((1.0 + 26.5 * rfr\_pc\_enrichment\_det)) / (cgt\_cellheight * cgt\_density)$ | recycling of sedimentary detritus to ammonium using manganese oxide (manganese reduction) (consumes h3oplus) |
| $- (-1) * (p\_sed\_5\_mnred\_mn2) * ((1.0 + 26.5 * rfr\_pc\_enrichment\_det)) / (cgt\_cellheight * cgt\_density)$ | recycling of sedimentary detritus to ammonium using manganese oxide (manganese reduction) (consumes h3oplus) |
| $- (-1) * (p\_sed\_6\_mnred\_mn2) * ((1.0 + 26.5 * rfr\_pc\_enrichment\_det)) / (cgt\_cellheight * cgt\_density)$ | recycling of sedimentary detritus to ammonium using manganese oxide (manganese reduction) (consumes h3oplus) |
| $- (-1) * (p\_sed\_1\_irred\_ims) / (cgt\_cellheight * cgt\_density)$                                             | recycling of sedimentary detritus to ammonium using iron hydroxide (iron reduction) (consumes h3oplus)       |
| $- (-1) * (p\_sed\_2\_irred\_ims) / (cgt\_cellheight * cgt\_density)$                                             | recycling of sedimentary detritus to ammonium using iron hydroxide (iron reduction) (consumes h3oplus)       |
| $- (-1) * (p\_sed\_3\_irred\_ims) / (cgt\_cellheight * cgt\_density)$                                             | recycling of sedimentary detritus to ammonium using iron hydroxide (iron reduction) (consumes h3oplus)       |

continued on next page...

## Tracer equations, continued from previous page

```

- (-1)*(p_sed_4_irred_ims) recycling of sedimentary detritus to ammonium
/(cgt_cellheight*cgt_density) using iron hydroxide (iron reduction)
                               (consumes h3oplus)

- (-1)*(p_sed_5_irred_ims) recycling of sedimentary detritus to ammonium
/(cgt_cellheight*cgt_density) using iron hydroxide (iron reduction)
                               (consumes h3oplus)

- (-1)*(p_sed_6_irred_ims) recycling of sedimentary detritus to ammonium
/(cgt_cellheight*cgt_density) using iron hydroxide (iron reduction)
                               (consumes h3oplus)

- (-1)*(p_sed_1_irredips_ims) recycling of sedimentary detritus to ammonium
*((1.0+159.1875*          using iron phosphate (iron reduction)
rfr_pc_enrichment_det)) (consumes h3oplus)
/(cgt_cellheight*cgt_density)

- (-1)*(p_sed_2_irredips_ims) recycling of sedimentary detritus to ammonium
*((1.0+159.1875*          using iron phosphate (iron reduction)
rfr_pc_enrichment_det)) (consumes h3oplus)
/(cgt_cellheight*cgt_density)

- (-1)*(p_sed_3_irredips_ims) recycling of sedimentary detritus to ammonium
*((1.0+159.1875*          using iron phosphate (iron reduction)
rfr_pc_enrichment_det)) (consumes h3oplus)
/(cgt_cellheight*cgt_density)

- (-1)*(p_sed_4_irredips_ims) recycling of sedimentary detritus to ammonium
*((1.0+159.1875*          using iron phosphate (iron reduction)
rfr_pc_enrichment_det)) (consumes h3oplus)
/(cgt_cellheight*cgt_density)

- (-1)*(p_sed_5_irredips_ims) recycling of sedimentary detritus to ammonium
*((1.0+159.1875*          using iron phosphate (iron reduction)
rfr_pc_enrichment_det)) (consumes h3oplus)
/(cgt_cellheight*cgt_density)

- (-1)*(p_sed_6_irredips_ims) recycling of sedimentary detritus to ammonium
*((1.0+159.1875*          using iron phosphate (iron reduction)
rfr_pc_enrichment_det)) (consumes h3oplus)
/(cgt_cellheight*cgt_density)

```

continued on next page...

## Tracer equations, continued from previous page

```

- (-1)*(p_sed_1_irred_iim)*  recycling of sedimentary detritus to ammonium
(53.0*rfr_pc_enrichment_det) using iron hydroxide (iron reduction)
/(cgt_cellheight*cgt_density) (consumes h3oplus)

- (-1)*(p_sed_1_irred_iim)    recycling of sedimentary detritus to ammonium
/(cgt_cellheight*cgt_density) using iron hydroxide (iron reduction)
                                (consumes h3oplus)

- (-1)*(p_sed_2_irred_iim)*  recycling of sedimentary detritus to ammonium
(53.0*rfr_pc_enrichment_det) using iron hydroxide (iron reduction)
/(cgt_cellheight*cgt_density) (consumes h3oplus)

- (-1)*(p_sed_2_irred_iim)    recycling of sedimentary detritus to ammonium
/(cgt_cellheight*cgt_density) using iron hydroxide (iron reduction)
                                (consumes h3oplus)

- (-1)*(p_sed_3_irred_iim)*  recycling of sedimentary detritus to ammonium
(53.0*rfr_pc_enrichment_det) using iron hydroxide (iron reduction)
/(cgt_cellheight*cgt_density) (consumes h3oplus)

- (-1)*(p_sed_3_irred_iim)    recycling of sedimentary detritus to ammonium
/(cgt_cellheight*cgt_density) using iron hydroxide (iron reduction)
                                (consumes h3oplus)

- (-1)*(p_sed_4_irred_iim)*  recycling of sedimentary detritus to ammonium
(53.0*rfr_pc_enrichment_det) using iron hydroxide (iron reduction)
/(cgt_cellheight*cgt_density) (consumes h3oplus)

- (-1)*(p_sed_4_irred_iim)    recycling of sedimentary detritus to ammonium
/(cgt_cellheight*cgt_density) using iron hydroxide (iron reduction)
                                (consumes h3oplus)

- (-1)*(p_sed_5_irred_iim)*  recycling of sedimentary detritus to ammonium
(53.0*rfr_pc_enrichment_det) using iron hydroxide (iron reduction)
/(cgt_cellheight*cgt_density) (consumes h3oplus)

- (-1)*(p_sed_5_irred_iim)    recycling of sedimentary detritus to ammonium
/(cgt_cellheight*cgt_density) using iron hydroxide (iron reduction)
                                (consumes h3oplus)

- (-1)*(p_sed_6_irred_iim)*  recycling of sedimentary detritus to ammonium
(53.0*rfr_pc_enrichment_det) using iron hydroxide (iron reduction)
/(cgt_cellheight*cgt_density) (consumes h3oplus)

```

continued on next page...

## Tracer equations, continued from previous page

- $(-1) \cdot (p_{\text{sed}_6\text{irred\_iim}})$  recycling of sedimentary detritus to ammonium  
 $/(\text{cgt\_cellheight} \cdot \text{cgt\_density})$  using iron hydroxide (iron reduction)  
 (consumes h3oplus)
  
- $(-1) \cdot (p_{\text{sed}_1\text{irredips\_iim}})$  recycling of sedimentary detritus to ammonium  
 $\cdot ((1+53.0 \cdot \text{rfr\_pc\_enrichment\_det}))$  using iron hydroxide (iron reduction)  
 $/(\text{cgt\_cellheight} \cdot \text{cgt\_density})$  (consumes h3oplus)
  
- $(-1) \cdot (p_{\text{sed}_2\text{irredips\_iim}})$  recycling of sedimentary detritus to ammonium  
 $\cdot ((1+53.0 \cdot \text{rfr\_pc\_enrichment\_det}))$  using iron hydroxide (iron reduction)  
 $/(\text{cgt\_cellheight} \cdot \text{cgt\_density})$  (consumes h3oplus)
  
- $(-1) \cdot (p_{\text{sed}_3\text{irredips\_iim}})$  recycling of sedimentary detritus to ammonium  
 $\cdot ((1+53.0 \cdot \text{rfr\_pc\_enrichment\_det}))$  using iron hydroxide (iron reduction)  
 $/(\text{cgt\_cellheight} \cdot \text{cgt\_density})$  (consumes h3oplus)
  
- $(-1) \cdot (p_{\text{sed}_4\text{irredips\_iim}})$  recycling of sedimentary detritus to ammonium  
 $\cdot ((1+53.0 \cdot \text{rfr\_pc\_enrichment\_det}))$  using iron hydroxide (iron reduction)  
 $/(\text{cgt\_cellheight} \cdot \text{cgt\_density})$  (consumes h3oplus)
  
- $(-1) \cdot (p_{\text{sed}_5\text{irredips\_iim}})$  recycling of sedimentary detritus to ammonium  
 $\cdot ((1+53.0 \cdot \text{rfr\_pc\_enrichment\_det}))$  using iron hydroxide (iron reduction)  
 $/(\text{cgt\_cellheight} \cdot \text{cgt\_density})$  (consumes h3oplus)
  
- $(-1) \cdot (p_{\text{sed}_6\text{irredips\_iim}})$  recycling of sedimentary detritus to ammonium  
 $\cdot ((1+53.0 \cdot \text{rfr\_pc\_enrichment\_det}))$  using iron hydroxide (iron reduction)  
 $/(\text{cgt\_cellheight} \cdot \text{cgt\_density})$  (consumes h3oplus)
  
- $(-1) \cdot (p_{\text{i3i}_1\text{irred\_i2i}})$  recycling of sedimentary detritus to ammonium  
 $/(\text{cgt\_cellheight} \cdot \text{cgt\_density})$  using iron-III in clay minerals (iron reduction)  
 (consumes h3oplus)
  
- $(-1) \cdot (p_{\text{i3i}_2\text{irred\_i2i}})$  recycling of sedimentary detritus to ammonium  
 $/(\text{cgt\_cellheight} \cdot \text{cgt\_density})$  using iron-III in clay minerals (iron reduction)  
 (consumes h3oplus)

continued on next page...

## Tracer equations, continued from previous page

- $(-1) \cdot (p_{i3i\_3\_irred\_i2i}) / (cgt\_cellheight \cdot cgt\_density)$  recycling of sedimentary detritus to ammonium using iron-III in clay minerals (iron reduction) (consumes h3oplus)
- $(-1) \cdot (p_{i3i\_4\_irred\_i2i}) / (cgt\_cellheight \cdot cgt\_density)$  recycling of sedimentary detritus to ammonium using iron-III in clay minerals (iron reduction) (consumes h3oplus)
- $(-1) \cdot (p_{i3i\_5\_irred\_i2i}) / (cgt\_cellheight \cdot cgt\_density)$  recycling of sedimentary detritus to ammonium using iron-III in clay minerals (iron reduction) (consumes h3oplus)
- $(-1) \cdot (p_{i3i\_6\_irred\_i2i}) / (cgt\_cellheight \cdot cgt\_density)$  recycling of sedimentary detritus to ammonium using iron-III in clay minerals (iron reduction) (consumes h3oplus)
- $(-1) \cdot (p_{ims\_diss\_fe2}) \cdot (2.0) / (cgt\_cellheight \cdot cgt\_density)$  dissolution of magnetite to iron II (precipitating iron hydroxides) (consumes h3oplus)
- $(-1) \cdot (p_{rho\_diss\_mn2}) \cdot (3.2) / (cgt\_cellheight \cdot cgt\_density)$  rhodochrosite dissolution to manganese-II (consumes h3oplus)
- $(-1) \cdot (p_{ims\_form2\_pyr}) \cdot (0.5) / (cgt\_cellheight \cdot cgt\_density)$  pyrite formation from iron monosulfide (consumes h3oplus)
- $(-1) \cdot (p_{pyr\_oxmos\_ihs}) \cdot (1.25) / (cgt\_cellheight \cdot cgt\_density)$  oxidation of pyrite by manganese oxide to iron oxyhydroxide (consumes h3oplus)
- $(-1) \cdot (p_{po4\_ads\_pim}) \cdot (3) / (cgt\_cellheight \cdot cgt\_density)$  phosphate adsorption to illite-montmorillonite mixed layer minerals (consumes h3oplus)
- $(-1) \cdot (p_{h2s\_mnox\_so4}) \cdot (1.5) / (cgt\_cellheight \cdot cgt\_density)$  oxidation of h2s by reduction of MnO2 (consumes h3oplus)
- $(-1) \cdot (p_{sed\_1\_sulfdeep\_nh4}) \cdot ((1.0 + rfr\_pc\_enrichment\_det \cdot 6.625)) / (cgt\_cellheight \cdot cgt\_density)$  parameterization for recycling of sedimentary detritus to ammonium below the deepest sediment layer (sulfate reduction / methane formation) (consumes h3oplus)

continued on next page...

## Tracer equations, continued from previous page

- $(-1) \cdot (p\_sed\_2\_sulfdeep\_nh4) \cdot ((1.0 + rfr\_pc\_enrichment\_det \cdot 6.625) / (cgt\_cellheight \cdot cgt\_density))$  parameterization for recycling of sedimentary detritus to ammonium below the deepest sediment layer (sulfate reduction / methane formation) (consumes h3oplus)
- $(-1) \cdot (p\_sed\_3\_sulfdeep\_nh4) \cdot ((1.0 + rfr\_pc\_enrichment\_det \cdot 6.625) / (cgt\_cellheight \cdot cgt\_density))$  parameterization for recycling of sedimentary detritus to ammonium below the deepest sediment layer (sulfate reduction / methane formation) (consumes h3oplus)
- $(-1) \cdot (p\_sed\_4\_sulfdeep\_nh4) \cdot ((1.0 + rfr\_pc\_enrichment\_det \cdot 6.625) / (cgt\_cellheight \cdot cgt\_density))$  parameterization for recycling of sedimentary detritus to ammonium below the deepest sediment layer (sulfate reduction / methane formation) (consumes h3oplus)
- $(-1) \cdot (p\_sed\_5\_sulfdeep\_nh4) \cdot ((1.0 + rfr\_pc\_enrichment\_det \cdot 6.625) / (cgt\_cellheight \cdot cgt\_density))$  parameterization for recycling of sedimentary detritus to ammonium below the deepest sediment layer (sulfate reduction / methane formation) (consumes h3oplus)
- $(-1) \cdot (p\_sed\_6\_sulfdeep\_nh4) \cdot ((1.0 + rfr\_pc\_enrichment\_det \cdot 6.625) / (cgt\_cellheight \cdot cgt\_density))$  parameterization for recycling of sedimentary detritus to ammonium below the deepest sediment layer (sulfate reduction / methane formation) (consumes h3oplus)
- $(-1) \cdot (p\_ims\_biores\_ihw) \cdot (0.25) / (cgt\_cellheight \cdot cgt\_density)$  bio resuspension of iron monosulfide (consumes h3oplus)
- $(-1) \cdot (p\_rho\_biores\_mow) \cdot (1.7) / (cgt\_cellheight \cdot cgt\_density)$  bio resuspension of rhodochrosite (consumes h3oplus)
- $(-1) \cdot (p\_iim\_biores\_ihw) \cdot (0.25) / (cgt\_cellheight \cdot cgt\_density)$  bio resuspension of iron in clay minerals (consumes h3oplus)
- $(-1) \cdot (p\_ims\_ero\_ihw) \cdot (0.25) / (cgt\_cellheight \cdot cgt\_density)$  resuspension of iron monosulfide (consumes h3oplus)
- $(-1) \cdot (p\_rho\_ero\_mow) \cdot (1.7) / (cgt\_cellheight \cdot cgt\_density)$  bio resuspension of rhodochrosite (consumes h3oplus)

continued on next page...

## Tracer equations, continued from previous page

|                                                                                                |                                                                                                            |
|------------------------------------------------------------------------------------------------|------------------------------------------------------------------------------------------------------------|
| - (-1)*(p_iim_ero_ihw)*(0.25)<br>/(cgt_cellheight*cgt_density)                                 | bio resuspension of iron in clay minerals<br>(consumes h3oplus)                                            |
| - (-1)*(p_poc_denit)*(0.8)                                                                     | recycling of POC using nitrate (denitrification)<br>(consumes h3oplus)                                     |
| - (-1)*(p_poc_sulf)                                                                            | Mineralization of POC, e-acceptor sulfate<br>(sulfate reduction) (consumes h3oplus)                        |
| + (2)*(p_lpp_resp_nh4)*<br>(rfr_p)                                                             | respiration of large-cell phytoplankton<br>(produces t_po4)                                                |
| + (2)*(p_spp_resp_nh4)*<br>(rfr_p)                                                             | respiration of small-cell phytoplankton<br>(produces t_po4)                                                |
| + (2)*(p_cya_resp_nh4)*<br>(rfr_p)                                                             | respiration of diazotroph cyanobacteria<br>(produces t_po4)                                                |
| + (2)*(p_zoo_resp_nh4)*<br>(rfr_p)                                                             | respiration of zooplankton (produces t_po4)                                                                |
| + (2)*(p_sed_1_irredips_ims)*<br>(26.5*rfr_pc_enrichment_det)<br>/(cgt_cellheight*cgt_density) | recycling of sedimentary detritus to ammonium<br>using iron phosphate (iron reduction)<br>(produces t_po4) |
| + (2)*(p_sed_2_irredips_ims)*<br>(26.5*rfr_pc_enrichment_det)<br>/(cgt_cellheight*cgt_density) | recycling of sedimentary detritus to ammonium<br>using iron phosphate (iron reduction)<br>(produces t_po4) |
| + (2)*(p_sed_3_irredips_ims)*<br>(26.5*rfr_pc_enrichment_det)<br>/(cgt_cellheight*cgt_density) | recycling of sedimentary detritus to ammonium<br>using iron phosphate (iron reduction)<br>(produces t_po4) |
| + (2)*(p_sed_4_irredips_ims)*<br>(26.5*rfr_pc_enrichment_det)<br>/(cgt_cellheight*cgt_density) | recycling of sedimentary detritus to ammonium<br>using iron phosphate (iron reduction)<br>(produces t_po4) |
| + (2)*(p_sed_5_irredips_ims)*<br>(26.5*rfr_pc_enrichment_det)<br>/(cgt_cellheight*cgt_density) | recycling of sedimentary detritus to ammonium<br>using iron phosphate (iron reduction)<br>(produces t_po4) |
| + (2)*(p_sed_6_irredips_ims)*<br>(26.5*rfr_pc_enrichment_det)<br>/(cgt_cellheight*cgt_density) | recycling of sedimentary detritus to ammonium<br>using iron phosphate (iron reduction)<br>(produces t_po4) |

continued on next page...

## Tracer equations, continued from previous page

```

+ (2)*(p_sed_1_irredips_iim)* recycling of sedimentary detritus to ammonium
(rfr_pc_enrichment_det*26.5) using iron hydroxide (iron reduction) (produces
/(cgt_cellheight*cgt_density) t_po4)

+ (2)*(p_sed_2_irredips_iim)* recycling of sedimentary detritus to ammonium
(rfr_pc_enrichment_det*26.5) using iron hydroxide (iron reduction) (produces
/(cgt_cellheight*cgt_density) t_po4)

+ (2)*(p_sed_3_irredips_iim)* recycling of sedimentary detritus to ammonium
(rfr_pc_enrichment_det*26.5) using iron hydroxide (iron reduction) (produces
/(cgt_cellheight*cgt_density) t_po4)

+ (2)*(p_sed_4_irredips_iim)* recycling of sedimentary detritus to ammonium
(rfr_pc_enrichment_det*26.5) using iron hydroxide (iron reduction) (produces
/(cgt_cellheight*cgt_density) t_po4)

+ (2)*(p_sed_5_irredips_iim)* recycling of sedimentary detritus to ammonium
(rfr_pc_enrichment_det*26.5) using iron hydroxide (iron reduction) (produces
/(cgt_cellheight*cgt_density) t_po4)

+ (2)*(p_sed_6_irredips_iim)* recycling of sedimentary detritus to ammonium
(rfr_pc_enrichment_det*26.5) using iron hydroxide (iron reduction) (produces
/(cgt_cellheight*cgt_density) t_po4)

+ (2)*(p_ips_diss_po4)          dissolution of iron phosphate (produces t_po4)
/(cgt_cellheight*cgt_density)

+ (2)*(p_ipw_diss_po4)          dissolution of iron phosphate (produces t_po4)

+ (2)*(p_pim_lib_po4)          phosphate liberation from illite-
/(cgt_cellheight*cgt_density) montmorillonite mixed layer minerals
(produces t_po4)

+ (2)*(p_detp_1_remin_po4)* recycling of detritus to ammonium using
(rfr_pc_enrichment_det*rfr_p) oxygen (respiration) (produces t_po4)

+ (2)*(p_detp_2_remin_po4)* recycling of detritus to ammonium using
(rfr_pc_enrichment_det*rfr_p) oxygen (respiration) (produces t_po4)

+ (2)*(p_detp_3_remin_po4)* recycling of detritus to ammonium using
(rfr_pc_enrichment_det*rfr_p) oxygen (respiration) (produces t_po4)

+ (2)*(p_detp_4_remin_po4)* recycling of detritus to ammonium using
(rfr_pc_enrichment_det*rfr_p) oxygen (respiration) (produces t_po4)

```

continued on next page...



## Tracer equations, continued from previous page

```

+ (2)*(p_detp_5_remin_po4)* recycling of detritus to ammonium using
(rfr_pc_enrichment_det*rfr_p) oxygen (respiration) (produces t_po4)

+ (2)*(p_detp_6_remin_po4)* recycling of detritus to ammonium using
(rfr_pc_enrichment_det*rfr_p) oxygen (respiration) (produces t_po4)

+ (2)*(p_sedp_1_remin_po4)* recycling of sediment detrital phosphate
(rfr_pc_enrichment_det*rfr_p) (produces t_po4)
/(cgt_cellheight*cgt_density)

+ (2)*(p_sedp_2_remin_po4)* recycling of sediment detrital phosphate
(rfr_pc_enrichment_det*rfr_p) (produces t_po4)
/(cgt_cellheight*cgt_density)

+ (2)*(p_sedp_3_remin_po4)* recycling of sediment detrital phosphate
(rfr_pc_enrichment_det*rfr_p) (produces t_po4)
/(cgt_cellheight*cgt_density)

+ (2)*(p_sedp_4_remin_po4)* recycling of sediment detrital phosphate
(rfr_pc_enrichment_det*rfr_p) (produces t_po4)
/(cgt_cellheight*cgt_density)

+ (2)*(p_sedp_5_remin_po4)* recycling of sediment detrital phosphate
(rfr_pc_enrichment_det*rfr_p) (produces t_po4)
/(cgt_cellheight*cgt_density)

+ (2)*(p_sedp_6_remin_po4)* recycling of sediment detrital phosphate
(rfr_pc_enrichment_det*rfr_p) (produces t_po4)
/(cgt_cellheight*cgt_density)

+ (2)*(p_sedp_1_sulfdeep_po4) parameterization for recycling of sedimentary
*(rfr_pc_enrichment_det* detritus to ammonium below the deepest
rfr_p)/(cgt_cellheight* sediment layer (sulfate reduction / methane
cgt_density) formation) (produces t_po4)

+ (2)*(p_sedp_2_sulfdeep_po4) parameterization for recycling of sedimentary
*(rfr_pc_enrichment_det* detritus to ammonium below the deepest
rfr_p)/(cgt_cellheight* sediment layer (sulfate reduction / methane
cgt_density) formation) (produces t_po4)

+ (2)*(p_sedp_3_sulfdeep_po4) parameterization for recycling of sedimentary
*(rfr_pc_enrichment_det* detritus to ammonium below the deepest
rfr_p)/(cgt_cellheight* sediment layer (sulfate reduction / methane
cgt_density) formation) (produces t_po4)

```

continued on next page...

## Tracer equations, continued from previous page

|                                                                                                                       |                                                                                                                                                                           |
|-----------------------------------------------------------------------------------------------------------------------|---------------------------------------------------------------------------------------------------------------------------------------------------------------------------|
| $+(2)*(p\_sedp\_4\_sulfdeep\_po4)*$<br>$(rfr\_pc\_enrichment\_det*$<br>$rfr\_p)/(cgt\_cellheight*$<br>$cgt\_density)$ | parameterization for recycling of sedimentary<br>detritus to ammonium below the deepest<br>sediment layer (sulfate reduction / methane<br>formation) (produces $t\_po4$ ) |
| $+(2)*(p\_sedp\_5\_sulfdeep\_po4)*$<br>$(rfr\_pc\_enrichment\_det*$<br>$rfr\_p)/(cgt\_cellheight*$<br>$cgt\_density)$ | parameterization for recycling of sedimentary<br>detritus to ammonium below the deepest<br>sediment layer (sulfate reduction / methane<br>formation) (produces $t\_po4$ ) |
| $+(2)*(p\_sedp\_6\_sulfdeep\_po4)*$<br>$(rfr\_pc\_enrichment\_det*$<br>$rfr\_p)/(cgt\_cellheight*$<br>$cgt\_density)$ | parameterization for recycling of sedimentary<br>detritus to ammonium below the deepest<br>sediment layer (sulfate reduction / methane<br>formation) (produces $t\_po4$ ) |
| $-(2)*(p\_no3\_assim\_lpp)*$<br>$(rfr\_p)$                                                                            | assimilation of nitrate by large-cell<br>phytoplankton (consumes $t\_po4$ )                                                                                               |
| $-(2)*(p\_nh4\_assim\_lpp)*$<br>$(rfr\_p)$                                                                            | assimilation of ammonium by large-cell<br>phytoplankton (consumes $t\_po4$ )                                                                                              |
| $-(2)*(p\_no3\_assim\_spp)*$<br>$(rfr\_p)$                                                                            | assimilation of nitrate by small-cell<br>phytoplankton (consumes $t\_po4$ )                                                                                               |
| $-(2)*(p\_nh4\_assim\_spp)*$<br>$(rfr\_p)$                                                                            | assimilation of ammonium by small-cell<br>phytoplankton (consumes $t\_po4$ )                                                                                              |
| $-(2)*(p\_n2\_assim\_cya)*$<br>$(rfr\_p)$                                                                             | fixation of dinitrogen by diazotroph<br>cyanobacteria (consumes $t\_po4$ )                                                                                                |
| $-(2)*(p\_po4\_ads\_ips)$<br>$/(cgt\_cellheight*cgt\_density)$                                                        | adsorption of phosphate to iron hydroxide<br>particles (consumes $t\_po4$ )                                                                                               |
| $-(2)*(p\_po4\_ads\_ipw)$                                                                                             | adsorption of phosphate to iron hydroxide<br>particles (consumes $t\_po4$ )                                                                                               |
| $-(2)*(p\_po4\_ads\_pim)$<br>$/(cgt\_cellheight*cgt\_density)$                                                        | phosphate adsorption to illite-montmorillonite<br>mixed layer minerals (consumes $t\_po4$ )                                                                               |

## Change of: iron-bound phosphate in the sediment

$$\frac{d}{dt} t\_ips =$$

$$+ p\_ipw\_sedi\_ips \quad \text{sedimentation of iron PO4}$$

continued on next page...

## Tracer equations, continued from previous page

|                                                           |                                                                                     |
|-----------------------------------------------------------|-------------------------------------------------------------------------------------|
| + p_po4_ads_ips                                           | adsorption of phosphate to iron hydroxide particles                                 |
| - p_ips_ero_ipw                                           | erosion of iron PO4                                                                 |
| - p_ips_biores_ipw                                        | bio resuspension of iron PO4                                                        |
| - (p_sed_1_irredips_ims)*<br>(26.5*rfr_pc_enrichment_det) | recycling of sedimentary detritus to ammonium using iron phosphate (iron reduction) |
| - (p_sed_2_irredips_ims)*<br>(26.5*rfr_pc_enrichment_det) | recycling of sedimentary detritus to ammonium using iron phosphate (iron reduction) |
| - (p_sed_3_irredips_ims)*<br>(26.5*rfr_pc_enrichment_det) | recycling of sedimentary detritus to ammonium using iron phosphate (iron reduction) |
| - (p_sed_4_irredips_ims)*<br>(26.5*rfr_pc_enrichment_det) | recycling of sedimentary detritus to ammonium using iron phosphate (iron reduction) |
| - (p_sed_5_irredips_ims)*<br>(26.5*rfr_pc_enrichment_det) | recycling of sedimentary detritus to ammonium using iron phosphate (iron reduction) |
| - (p_sed_6_irredips_ims)*<br>(26.5*rfr_pc_enrichment_det) | recycling of sedimentary detritus to ammonium using iron phosphate (iron reduction) |
| - (p_sed_1_irredips_iim)*<br>(26.5*rfr_pc_enrichment_det) | recycling of sedimentary detritus to ammonium using iron hydroxide (iron reduction) |
| - (p_sed_2_irredips_iim)*<br>(26.5*rfr_pc_enrichment_det) | recycling of sedimentary detritus to ammonium using iron hydroxide (iron reduction) |
| - (p_sed_3_irredips_iim)*<br>(26.5*rfr_pc_enrichment_det) | recycling of sedimentary detritus to ammonium using iron hydroxide (iron reduction) |
| - (p_sed_4_irredips_iim)*<br>(26.5*rfr_pc_enrichment_det) | recycling of sedimentary detritus to ammonium using iron hydroxide (iron reduction) |
| - (p_sed_5_irredips_iim)*<br>(26.5*rfr_pc_enrichment_det) | recycling of sedimentary detritus to ammonium using iron hydroxide (iron reduction) |
| - (p_sed_6_irredips_iim)*<br>(26.5*rfr_pc_enrichment_det) | recycling of sedimentary detritus to ammonium using iron hydroxide (iron reduction) |
| - p_ips_diss_po4                                          | dissolution of iron phosphate                                                       |

continued on next page...

## Tracer equations, continued from previous page

- p\_ips\_removal                      transport from fluffy layer to deep basins

**Change of: sulfate**

$\frac{d}{dt} t_{so4} =$

+ p\_sul\_oxo2\_so4                      oxidation of elemental sulfur with oxygen

+ p\_sul\_oxno3\_so4                      oxidation of elemental sulfur with nitrate

+                                              reduction of sedimentary iron hydroxide to  
p\_ihs\_red\_iim/(cgt\_cellheight\*iron-II  
cgt\_density)

+                                              reduction of sedimentary iron hydroxide to  
p\_ihs\_red\_ims/(cgt\_cellheight\*iron-II  
cgt\_density)

+ p\_so4\_relax\_upwards                      raise SO4 concentration in the water column to  
salinity-determined default value

+ (p\_pyr\_oxmos\_ihs)\*(0.375)                      oxidation of pyrite by manganese oxide to iron  
/(cgt\_cellheight\*cgt\_density) oxyhydroxide

+ (p\_pyr\_oxo2\_ihs)\*(0.25)                      oxidation of pyrite by manganese oxide to iron  
/(cgt\_cellheight\*cgt\_density) oxyhydroxide

+                                              reduction of iron-III in clay minerals to iron-II  
p\_i3i\_redh2s\_i2i/(cgt\_cellheight\*cgt\_density) consuming h2s

+                                              reduction of sedimentary iron hydroxide to  
p\_ihc\_red\_iim/(cgt\_cellheight\*iron-II  
cgt\_density)

+                                              reduction of sedimentary iron hydroxide to  
p\_ihc\_red\_ims/(cgt\_cellheight\*iron-II  
cgt\_density)

+ (p\_h2s\_mnox\_so4)\*(0.25)                      oxidation of h2s by reduction of MnO2  
/(cgt\_cellheight\*cgt\_density)

+                                              iron monosulfide oxidation to iron  
p\_ims\_oxo2\_ihs/(cgt\_cellheight\*cgt\_density) toxihydroxides

continued on next page...

## Tracer equations, continued from previous page

|                                                                                                     |                                                                                 |
|-----------------------------------------------------------------------------------------------------|---------------------------------------------------------------------------------|
| $+ (p\_pyr\_biores\_ihw) * (0.125)$<br>$/(cgt\_cellheight * cgt\_density)$                          | bio resuspension of pyrite                                                      |
| $+ (p\_pyr\_ero\_ihw) * (0.125)$<br>$/(cgt\_cellheight * cgt\_density)$                             | resuspension of pyrite                                                          |
| $- (p\_sed\_1\_sulf\_nh4) * (rfr\_pc\_enrichment\_det * 3.3125) / (cgt\_cellheight * cgt\_density)$ | recycling of sedimentary detritus to ammonium using sulfate (sulfate reduction) |
| $- (p\_sed\_2\_sulf\_nh4) * (rfr\_pc\_enrichment\_det * 3.3125) / (cgt\_cellheight * cgt\_density)$ | recycling of sedimentary detritus to ammonium using sulfate (sulfate reduction) |
| $- (p\_sed\_3\_sulf\_nh4) * (rfr\_pc\_enrichment\_det * 3.3125) / (cgt\_cellheight * cgt\_density)$ | recycling of sedimentary detritus to ammonium using sulfate (sulfate reduction) |
| $- (p\_sed\_4\_sulf\_nh4) * (rfr\_pc\_enrichment\_det * 3.3125) / (cgt\_cellheight * cgt\_density)$ | recycling of sedimentary detritus to ammonium using sulfate (sulfate reduction) |
| $- (p\_sed\_5\_sulf\_nh4) * (rfr\_pc\_enrichment\_det * 3.3125) / (cgt\_cellheight * cgt\_density)$ | recycling of sedimentary detritus to ammonium using sulfate (sulfate reduction) |
| $- (p\_sed\_6\_sulf\_nh4) * (rfr\_pc\_enrichment\_det * 3.3125) / (cgt\_cellheight * cgt\_density)$ | recycling of sedimentary detritus to ammonium using sulfate (sulfate reduction) |
| $- (p\_det\_1\_sulf\_nh4) * (rfr\_pc\_enrichment\_det * 3.3125)$                                    | recycling of sedimentary detritus to ammonium using sulfate (sulfate reduction) |
| $- (p\_det\_2\_sulf\_nh4) * (rfr\_pc\_enrichment\_det * 3.3125)$                                    | recycling of sedimentary detritus to ammonium using sulfate (sulfate reduction) |

continued on next page. . .

## Tracer equations, continued from previous page

|                                                                                                  |                                                                                                                                                      |
|--------------------------------------------------------------------------------------------------|------------------------------------------------------------------------------------------------------------------------------------------------------|
| - (p_det_3_sulf_nh4)*<br>(rfr_pc_enrichment_det*<br>3.3125)                                      | recycling of sedimentary detritus to ammonium<br>using sulfate (sulfate reduction)                                                                   |
| - (p_det_4_sulf_nh4)*<br>(rfr_pc_enrichment_det*<br>3.3125)                                      | recycling of sedimentary detritus to ammonium<br>using sulfate (sulfate reduction)                                                                   |
| - (p_det_5_sulf_nh4)*<br>(rfr_pc_enrichment_det*<br>3.3125)                                      | recycling of sedimentary detritus to ammonium<br>using sulfate (sulfate reduction)                                                                   |
| - (p_det_6_sulf_nh4)*<br>(rfr_pc_enrichment_det*<br>3.3125)                                      | recycling of sedimentary detritus to ammonium<br>using sulfate (sulfate reduction)                                                                   |
| - p_so4_relax_downwards                                                                          | lower SO4 concentration in the water column<br>to salinity-determined default value                                                                  |
| - (p_ims_form2_pyr)*(0.25)<br>/(cgt_cellheight*cgt_density)                                      | pyrite formation from iron monosulfide                                                                                                               |
| - (p_sed_1_sulfdeep_nh4)*<br>(rfr_pc_enrichment_det*<br>3.3125)/(cgt_cellheight*<br>cgt_density) | parameterization for recycling of sedimentary<br>detritus to ammonium below the deepest<br>sediment layer (sulfate reduction / methane<br>formation) |
| - (p_sed_2_sulfdeep_nh4)*<br>(rfr_pc_enrichment_det*<br>3.3125)/(cgt_cellheight*<br>cgt_density) | parameterization for recycling of sedimentary<br>detritus to ammonium below the deepest<br>sediment layer (sulfate reduction / methane<br>formation) |
| - (p_sed_3_sulfdeep_nh4)*<br>(rfr_pc_enrichment_det*<br>3.3125)/(cgt_cellheight*<br>cgt_density) | parameterization for recycling of sedimentary<br>detritus to ammonium below the deepest<br>sediment layer (sulfate reduction / methane<br>formation) |
| - (p_sed_4_sulfdeep_nh4)*<br>(rfr_pc_enrichment_det*<br>3.3125)/(cgt_cellheight*<br>cgt_density) | parameterization for recycling of sedimentary<br>detritus to ammonium below the deepest<br>sediment layer (sulfate reduction / methane<br>formation) |

continued on next page...

## Tracer equations, continued from previous page

|                                                                                                  |                                                                                                                                                      |
|--------------------------------------------------------------------------------------------------|------------------------------------------------------------------------------------------------------------------------------------------------------|
| - (p_sed_5_sulfdeep_nh4)*<br>(rfr_pc_enrichment_det*<br>3.3125)/(cgt_cellheight*<br>cgt_density) | parameterization for recycling of sedimentary<br>detritus to ammonium below the deepest<br>sediment layer (sulfate reduction / methane<br>formation) |
| - (p_sed_6_sulfdeep_nh4)*<br>(rfr_pc_enrichment_det*<br>3.3125)/(cgt_cellheight*<br>cgt_density) | parameterization for recycling of sedimentary<br>detritus to ammonium below the deepest<br>sediment layer (sulfate reduction / methane<br>formation) |
| - (p_ims_biores_ihw)*(0.125)<br>/(cgt_cellheight*cgt_density)                                    | bio resuspension of iron monosulfide                                                                                                                 |
| - (p_rho_biores_mow)*(0.25)<br>/(cgt_cellheight*cgt_density)                                     | bio resuspension of rhodochrosite                                                                                                                    |
| - (p_iim_biores_ihw)*(0.125)<br>/(cgt_cellheight*cgt_density)                                    | bio resuspension of iron in clay minerals                                                                                                            |
| - (p_ims_ero_ihw)*(0.125)<br>/(cgt_cellheight*cgt_density)                                       | resuspension of iron monosulfide                                                                                                                     |
| - (p_rho_ero_mow)*(0.25)<br>/(cgt_cellheight*cgt_density)                                        | bio resuspension of rhodochrosite                                                                                                                    |
| - (p_iim_ero_ihw)*(0.125)<br>/(cgt_cellheight*cgt_density)                                       | bio resuspension of iron in clay minerals                                                                                                            |
| - (p_poc_sulf)*(0.5)                                                                             | Mineralization of POC, e-acceptor sulfate<br>(sulfate reduction)                                                                                     |

## Change of: suspended iron phosphate

$$\frac{d}{dt} t_{ipw} =$$

|                                                   |                                                        |
|---------------------------------------------------|--------------------------------------------------------|
| +                                                 | erosion of iron PO4                                    |
| p_ips_ero_ipw/(cgt_cellheight*<br>cgt_density)    |                                                        |
| +                                                 | bio resuspension of iron PO4                           |
| p_ips_biores_ipw/(cgt_cellheight*<br>cgt_density) |                                                        |
| + p_po4_ads_ipw                                   | adsorption of phosphate to iron hydroxide<br>particles |

continued on next page...

## Tracer equations, continued from previous page

- sedimentation of iron PO4  
p\_ipw\_sedi\_ips/(cgt\_cellheight  
cgt\_density)
- p\_ipw\_diss\_po4 dissolution of iron phosphate

## Change of: large-cell phytoplankton

$$\frac{d}{dt} t_{lpp} =$$

- + p\_no3\_assim\_lpp assimilation of nitrate by large-cell phytoplankton
- + p\_nh4\_assim\_lpp assimilation of ammonium by large-cell phytoplankton
- p\_lpp\_graz\_zoo grazing of zooplankton eating large-cell phytoplankton
- p\_lpp\_resp\_nh4 respiration of large-cell phytoplankton
- p\_lpp\_mort\_det\_1 mortality of large-cell phytoplankton
- p\_lpp\_mort\_det\_2 mortality of large-cell phytoplankton
- p\_lpp\_mort\_det\_3 mortality of large-cell phytoplankton
- p\_lpp\_mort\_det\_4 mortality of large-cell phytoplankton
- p\_lpp\_mort\_det\_5 mortality of large-cell phytoplankton
- p\_lpp\_mort\_det\_6 mortality of large-cell phytoplankton

## Change of: diazotroph cyanobacteria

$$\frac{d}{dt} t_{cya} =$$

- + p\_n2\_assim\_cya fixation of dinitrogen by diazotroph cyanobacteria
- p\_cya\_graz\_zoo grazing of zooplankton eating diazotroph cyanobacteria
- p\_cya\_resp\_nh4 respiration of diazotroph cyanobacteria
- p\_cya\_mort\_det\_1 mortality of diazotroph cyanobacteria

continued on next page...



## Tracer equations, continued from previous page

|                    |                                       |
|--------------------|---------------------------------------|
| - p_cya_mort_det_2 | mortality of diazotroph cyanobacteria |
| - p_cya_mort_det_3 | mortality of diazotroph cyanobacteria |
| - p_cya_mort_det_4 | mortality of diazotroph cyanobacteria |
| - p_cya_mort_det_5 | mortality of diazotroph cyanobacteria |
| - p_cya_mort_det_6 | mortality of diazotroph cyanobacteria |

## Change of: detritus fractions\_1

$$\begin{aligned}
 \frac{d}{dt} t\_det\_1 = & \\
 & + (p\_lpp\_mort\_det\_1)* \quad \text{mortality of large-cell phytoplankton} \\
 & ((1.0/rfr\_pc\_enrichment\_det)) \\
 & + (p\_spp\_mort\_det\_1)* \quad \text{mortality of small-scale phytoplankton} \\
 & ((1.0/rfr\_pc\_enrichment\_det)) \\
 & + (p\_cya\_mort\_det\_1)* \quad \text{mortality of diazotroph cyanobacteria} \\
 & ((1.0/rfr\_pc\_enrichment\_det)) \\
 & + (p\_zoo\_mort\_det\_1)* \quad \text{mortality of zooplankton} \\
 & ((1.0/rfr\_pc\_enrichment\_det)) \\
 & + \quad \text{sedimentary detritus erosion} \\
 & p\_sed\_1\_ero\_det/(cgt\_cellheight \\
 & cgt\_density) \\
 & + \quad \text{bio resuspension of sedimentary detritus} \\
 & p\_sed\_1\_biores\_det/(cgt\_cellheight \\
 & cgt\_density) \\
 & + \quad \text{surface flux of detritus} \\
 & p\_stf\_det\_1/(cgt\_cellheight* \\
 & cgt\_density) \\
 & - \quad \text{detritus sedimentation} \\
 & p\_det\_1\_sedi\_sed/(cgt\_cellheight \\
 & cgt\_density) \\
 & - p\_det\_1\_resp\_nh4 \quad \text{recycling of detritus to ammonium using} \\
 & \quad \text{oxygen (respiration)}
 \end{aligned}$$

continued on next page...

## Tracer equations, continued from previous page

- p\_det\_1\_denit\_nh4      recycling of detritus to ammonium using  
nitrate (denitrification)
- p\_det\_1\_sulf\_nh4      recycling of sedimentary detritus to ammonium  
using sulfate (sulfate reduction)

**Change of: detritus fractions\_2**

$$\begin{aligned} \frac{d}{dt} t\_det\_2 = & \\ & + (p\_lpp\_mort\_det\_2)* \quad \text{mortality of large-cell phytoplankton} \\ & ((1.0/rfr\_pc\_enrichment\_det)) \\ & + (p\_spp\_mort\_det\_2)* \quad \text{mortality of small-scale phytoplankton} \\ & ((1.0/rfr\_pc\_enrichment\_det)) \\ & + (p\_cya\_mort\_det\_2)* \quad \text{mortality of diazotroph cyanobacteria} \\ & ((1.0/rfr\_pc\_enrichment\_det)) \\ & + (p\_zoo\_mort\_det\_2)* \quad \text{mortality of zooplankton} \\ & ((1.0/rfr\_pc\_enrichment\_det)) \\ & + \quad \text{sedimentary detritus erosion} \\ & p\_sed\_2\_ero\_det/(cgt\_cellheight \\ & cgt\_density) \\ & + \quad \text{bio resuspension of sedimentary detritus} \\ & p\_sed\_2\_biores\_det/(cgt\_cellheight \\ & cgt\_density) \\ & + \quad \text{surface flux of detritus} \\ & p\_stf\_det\_2/(cgt\_cellheight* \\ & cgt\_density) \\ & - \quad \text{detritus sedimentation} \\ & p\_det\_2\_sedi\_sed/(cgt\_cellheight \\ & cgt\_density) \\ & - p\_det\_2\_resp\_nh4 \quad \text{recycling of detritus to ammonium using} \\ & \text{oxygen (respiration)} \\ & - p\_det\_2\_denit\_nh4 \quad \text{recycling of detritus to ammonium using} \\ & \text{nitrate (denitrification)} \\ & - p\_det\_2\_sulf\_nh4 \quad \text{recycling of sedimentary detritus to ammonium} \\ & \text{using sulfate (sulfate reduction)} \end{aligned}$$

continued on next page...

## Tracer equations, continued from previous page

## Change of: detritus fractions\_3

$$\begin{aligned}
\frac{d}{dt} t\_det\_3 = & \\
& + (p\_lpp\_mort\_det\_3)* \quad \text{mortality of large-cell phytoplankton} \\
& \quad ((1.0/rfr\_pc\_enrichment\_det)) \\
& + (p\_spp\_mort\_det\_3)* \quad \text{mortality of small-scale phytoplankton} \\
& \quad ((1.0/rfr\_pc\_enrichment\_det)) \\
& + (p\_cya\_mort\_det\_3)* \quad \text{mortality of diazotroph cyanobacteria} \\
& \quad ((1.0/rfr\_pc\_enrichment\_det)) \\
& + (p\_zoo\_mort\_det\_3)* \quad \text{mortality of zooplankton} \\
& \quad ((1.0/rfr\_pc\_enrichment\_det)) \\
& + \quad \text{sedimentary detritus erosion} \\
& \quad p\_sed\_3\_ero\_det/(cgt\_cellheight \\
& \quad \quad cgt\_density) \\
& + \quad \text{bio resuspension of sedimentary detritus} \\
& \quad p\_sed\_3\_biores\_det/(cgt\_cellheight \\
& \quad \quad cgt\_density) \\
& + \quad \text{surface flux of detritus} \\
& \quad p\_stf\_det\_3/(cgt\_cellheight* \\
& \quad \quad cgt\_density) \\
& - \quad \text{detritus sedimentation} \\
& \quad p\_det\_3\_sedi\_sed/(cgt\_cellheight \\
& \quad \quad cgt\_density) \\
& - p\_det\_3\_resp\_nh4 \quad \text{recycling of detritus to ammonium using} \\
& \quad \quad \text{oxygen (respiration)} \\
& - p\_det\_3\_denit\_nh4 \quad \text{recycling of detritus to ammonium using} \\
& \quad \quad \text{nitrate (denitrification)} \\
& - p\_det\_3\_sulf\_nh4 \quad \text{recycling of sedimentary detritus to ammonium} \\
& \quad \quad \text{using sulfate (sulfate reduction)}
\end{aligned}$$

## Change of: detritus fractions\_4

$$\begin{aligned}
\frac{d}{dt} t\_det\_4 = & \\
& + (p\_lpp\_mort\_det\_4)* \quad \text{mortality of large-cell phytoplankton} \\
& \quad ((1.0/rfr\_pc\_enrichment\_det))
\end{aligned}$$

continued on next page...

## Tracer equations, continued from previous page

$$\begin{aligned}
& + (p\_spp\_mort\_det\_4)* \quad \text{mortality of small-scale phytoplankton} \\
& ((1.0/rfr\_pc\_enrichment\_det)) \\
& + (p\_cya\_mort\_det\_4)* \quad \text{mortality of diazotroph cyanobacteria} \\
& ((1.0/rfr\_pc\_enrichment\_det)) \\
& + (p\_zoo\_mort\_det\_4)* \quad \text{mortality of zooplankton} \\
& ((1.0/rfr\_pc\_enrichment\_det)) \\
& + \quad \text{sedimentary detritus erosion} \\
& p\_sed\_4\_ero\_det/(cgt\_cellheigh \\
& cgt\_density) \\
& + \quad \text{bio resuspension of sedimentary detritus} \\
& p\_sed\_4\_biores\_det/(cgt\_cellhe \\
& cgt\_density) \\
& + \quad \text{surface flux of detritus} \\
& p\_stf\_det\_4/(cgt\_cellheight* \\
& cgt\_density) \\
& - \quad \text{detritus sedimentation} \\
& p\_det\_4\_sedi\_sed/(cgt\_cellheig \\
& cgt\_density) \\
& - p\_det\_4\_resp\_nh4 \quad \text{recycling of detritus to ammonium using} \\
& \quad \text{oxygen (respiration)} \\
& - p\_det\_4\_denit\_nh4 \quad \text{recycling of detritus to ammonium using} \\
& \quad \text{nitrate (denitrification)} \\
& - p\_det\_4\_sulf\_nh4 \quad \text{recycling of sedimentary detritus to ammonium} \\
& \quad \text{using sulfate (sulfate reduction)}
\end{aligned}$$

## Change of: detritus fractions\_5

$$\frac{d}{dt} t\_det\_5 =$$

$$\begin{aligned}
& + (p\_lpp\_mort\_det\_5)* \quad \text{mortality of large-cell phytoplankton} \\
& ((1.0/rfr\_pc\_enrichment\_det)) \\
& + (p\_spp\_mort\_det\_5)* \quad \text{mortality of small-scale phytoplankton} \\
& ((1.0/rfr\_pc\_enrichment\_det)) \\
& + (p\_cya\_mort\_det\_5)* \quad \text{mortality of diazotroph cyanobacteria} \\
& ((1.0/rfr\_pc\_enrichment\_det))
\end{aligned}$$

continued on next page...

## Tracer equations, continued from previous page

$$\begin{aligned}
& + (p\_zoo\_mort\_det\_5) * \text{mortality of zooplankton} \\
& ((1.0/rfr\_pc\_enrichment\_det)) \\
& + \text{sedimentary detritus erosion} \\
& p\_sed\_5\_ero\_det / (cgt\_cellheight \\
& cgt\_density) \\
& + \text{bio resuspension of sedimentary detritus} \\
& p\_sed\_5\_biores\_det / (cgt\_cellheight \\
& cgt\_density) \\
& + \text{surface flux of detritus} \\
& p\_stf\_det\_5 / (cgt\_cellheight * \\
& cgt\_density) \\
& - \text{detritus sedimentation} \\
& p\_det\_5\_sedi\_sed / (cgt\_cellheight \\
& cgt\_density) \\
& - p\_det\_5\_resp\_nh4 \quad \text{recycling of detritus to ammonium using} \\
& \quad \text{oxygen (respiration)} \\
& - p\_det\_5\_denit\_nh4 \quad \text{recycling of detritus to ammonium using} \\
& \quad \text{nitrate (denitrification)} \\
& - p\_det\_5\_sulf\_nh4 \quad \text{recycling of sedimentary detritus to ammonium} \\
& \quad \text{using sulfate (sulfate reduction)}
\end{aligned}$$

## Change of: detritus fractions\_6

$$\frac{d}{dt} t\_det\_6 =$$

$$\begin{aligned}
& + (p\_lpp\_mort\_det\_6) * \text{mortality of large-cell phytoplankton} \\
& ((1.0/rfr\_pc\_enrichment\_det)) \\
& + (p\_spp\_mort\_det\_6) * \text{mortality of small-scale phytoplankton} \\
& ((1.0/rfr\_pc\_enrichment\_det)) \\
& + (p\_cya\_mort\_det\_6) * \text{mortality of diazotroph cyanobacteria} \\
& ((1.0/rfr\_pc\_enrichment\_det)) \\
& + (p\_zoo\_mort\_det\_6) * \text{mortality of zooplankton} \\
& ((1.0/rfr\_pc\_enrichment\_det)) \\
& + \text{sedimentary detritus erosion} \\
& p\_sed\_6\_ero\_det / (cgt\_cellheight \\
& cgt\_density)
\end{aligned}$$

continued on next page...

## Tracer equations, continued from previous page

|                                       |                                                                                 |
|---------------------------------------|---------------------------------------------------------------------------------|
| +                                     | bio resuspension of sedimentary detritus                                        |
| $p\_sed\_6\_biores\_det/(cgt\_cellhe$ |                                                                                 |
| $cgt\_density)$                       |                                                                                 |
| +                                     | surface flux of detritus                                                        |
| $p\_stf\_det\_6/(cgt\_cellheight*$    |                                                                                 |
| $cgt\_density)$                       |                                                                                 |
| -                                     | detritus sedimentation                                                          |
| $p\_det\_6\_sedi\_sed/(cgt\_cellheig$ |                                                                                 |
| $cgt\_density)$                       |                                                                                 |
| - $p\_det\_6\_resp\_nh4$              | recycling of detritus to ammonium using oxygen (respiration)                    |
| - $p\_det\_6\_denit\_nh4$             | recycling of detritus to ammonium using nitrate (denitrification)               |
| - $p\_det\_6\_sulf\_nh4$              | recycling of sedimentary detritus to ammonium using sulfate (sulfate reduction) |

## Change of: sedimentary detritus fractions\_1

$$\frac{d}{dt} t\_sed\_1 =$$

|   |                          |                                                                                           |
|---|--------------------------|-------------------------------------------------------------------------------------------|
| + | $p\_det\_1\_sedi\_sed$   | detritus sedimentation                                                                    |
| - | $p\_sed\_1\_resp\_nh4$   | recycling of sedimentary detritus to ammonium using oxygen (respiration)                  |
| - | $p\_sed\_1\_denit\_nh4$  | recycling of sedimentary detritus to ammonium using nitrate (denitrification)             |
| - | $p\_sed\_1\_sulf\_nh4$   | recycling of sedimentary detritus to ammonium using sulfate (sulfate reduction)           |
| - | $p\_sed\_1\_ero\_det$    | sedimentary detritus erosion                                                              |
| - | $p\_sed\_1\_biores\_det$ | bio resuspension of sedimentary detritus                                                  |
| - | $p\_sed\_1\_mnred\_mn2$  | recycling of sedimentary detritus to ammonium using manganese oxide (manganese reduction) |
| - | $p\_sed\_1\_irred\_ims$  | recycling of sedimentary detritus to ammonium using iron hydroxide (iron reduction)       |

continued on next page...

## Tracer equations, continued from previous page

|                        |                                                                                                                                             |
|------------------------|---------------------------------------------------------------------------------------------------------------------------------------------|
| - p_sed_1_irredips_ims | recycling of sedimentary detritus to ammonium using iron phosphate (iron reduction)                                                         |
| - p_sed_1_irred_iim    | recycling of sedimentary detritus to ammonium using iron hydroxide (iron reduction)                                                         |
| - p_sed_1_irredips_iim | recycling of sedimentary detritus to ammonium using iron hydroxide (iron reduction)                                                         |
| - p_i3i_1_irred_i2i    | recycling of sedimentary detritus to ammonium using iron-III in clay minerals (iron reduction)                                              |
| - p_sed_1_removal      | transport from fluffy layer to deep basins                                                                                                  |
| - p_sed_1_sulfdeep_nh4 | parameterization for recycling of sedimentary detritus to ammonium below the deepest sediment layer (sulfate reduction / methane formation) |

## Change of: sedimentary detritus fractions\_2

$$\frac{d}{dt} t_{sed\_2} =$$

|                      |                                                                                           |
|----------------------|-------------------------------------------------------------------------------------------|
| + p_det_2_sedi_sed   | detritus sedimentation                                                                    |
| - p_sed_2_resp_nh4   | recycling of sedimentary detritus to ammonium using oxygen (respiration)                  |
| - p_sed_2_denit_nh4  | recycling of sedimentary detritus to ammonium using nitrate (denitrification)             |
| - p_sed_2_sulf_nh4   | recycling of sedimentary detritus to ammonium using sulfate (sulfate reduction)           |
| - p_sed_2_ero_det    | sedimentary detritus erosion                                                              |
| - p_sed_2_biores_det | bio resuspension of sedimentary detritus                                                  |
| - p_sed_2_mnred_mn2  | recycling of sedimentary detritus to ammonium using manganese oxide (manganese reduction) |
| - p_sed_2_irred_ims  | recycling of sedimentary detritus to ammonium using iron hydroxide (iron reduction)       |

continued on next page...

## Tracer equations, continued from previous page

|                        |                                                                                                                                             |
|------------------------|---------------------------------------------------------------------------------------------------------------------------------------------|
| - p_sed_2_irredips_ims | recycling of sedimentary detritus to ammonium using iron phosphate (iron reduction)                                                         |
| - p_sed_2_irred_iim    | recycling of sedimentary detritus to ammonium using iron hydroxide (iron reduction)                                                         |
| - p_sed_2_irredips_iim | recycling of sedimentary detritus to ammonium using iron hydroxide (iron reduction)                                                         |
| - p_i3i_2_irred_i2i    | recycling of sedimentary detritus to ammonium using iron-III in clay minerals (iron reduction)                                              |
| - p_sed_2_removal      | transport from fluffy layer to deep basins                                                                                                  |
| - p_sed_2_sulfdeep_nh4 | parameterization for recycling of sedimentary detritus to ammonium below the deepest sediment layer (sulfate reduction / methane formation) |

## Change of: sedimentary detritus fractions\_3

|                             |                                                                                           |
|-----------------------------|-------------------------------------------------------------------------------------------|
| $\frac{d}{dt} t_{sed\_3} =$ |                                                                                           |
| + p_det_3_sedi_sed          | detritus sedimentation                                                                    |
| - p_sed_3_resp_nh4          | recycling of sedimentary detritus to ammonium using oxygen (respiration)                  |
| - p_sed_3_denit_nh4         | recycling of sedimentary detritus to ammonium using nitrate (denitrification)             |
| - p_sed_3_sulf_nh4          | recycling of sedimentary detritus to ammonium using sulfate (sulfate reduction)           |
| - p_sed_3_ero_det           | sedimentary detritus erosion                                                              |
| - p_sed_3_biores_det        | bio resuspension of sedimentary detritus                                                  |
| - p_sed_3_mnred_mn2         | recycling of sedimentary detritus to ammonium using manganese oxide (manganese reduction) |
| - p_sed_3_irred_ims         | recycling of sedimentary detritus to ammonium using iron hydroxide (iron reduction)       |
| - p_sed_3_irredips_ims      | recycling of sedimentary detritus to ammonium using iron phosphate (iron reduction)       |

continued on next page...



## Tracer equations, continued from previous page

|                        |                                                                                                                                             |
|------------------------|---------------------------------------------------------------------------------------------------------------------------------------------|
| - p_sed_3_irred_iim    | recycling of sedimentary detritus to ammonium using iron hydroxide (iron reduction)                                                         |
| - p_sed_3_irredips_iim | recycling of sedimentary detritus to ammonium using iron hydroxide (iron reduction)                                                         |
| - p_i3i_3_irred_i2i    | recycling of sedimentary detritus to ammonium using iron-III in clay minerals (iron reduction)                                              |
| - p_sed_3_removal      | transport from fluffy layer to deep basins                                                                                                  |
| - p_sed_3_sulfdeep_nh4 | parameterization for recycling of sedimentary detritus to ammonium below the deepest sediment layer (sulfate reduction / methane formation) |

## Change of: sedimentary detritus fractions\_4

|                            |                                                                                           |
|----------------------------|-------------------------------------------------------------------------------------------|
| $\frac{d}{dt} t\_sed\_4 =$ |                                                                                           |
| + p_det_4_sedi_sed         | detritus sedimentation                                                                    |
| - p_sed_4_resp_nh4         | recycling of sedimentary detritus to ammonium using oxygen (respiration)                  |
| - p_sed_4_denit_nh4        | recycling of sedimentary detritus to ammonium using nitrate (denitrification)             |
| - p_sed_4_sulf_nh4         | recycling of sedimentary detritus to ammonium using sulfate (sulfate reduction)           |
| - p_sed_4_ero_det          | sedimentary detritus erosion                                                              |
| - p_sed_4_biores_det       | bio resuspension of sedimentary detritus                                                  |
| - p_sed_4_mnred_mn2        | recycling of sedimentary detritus to ammonium using manganese oxide (manganese reduction) |
| - p_sed_4_irred_ims        | recycling of sedimentary detritus to ammonium using iron hydroxide (iron reduction)       |
| - p_sed_4_irredips_ims     | recycling of sedimentary detritus to ammonium using iron phosphate (iron reduction)       |

continued on next page...

| Tracer equations, continued from previous page |  |                                                                                                                                             |
|------------------------------------------------|--|---------------------------------------------------------------------------------------------------------------------------------------------|
| - p_sed_4_irred_iim                            |  | recycling of sedimentary detritus to ammonium using iron hydroxide (iron reduction)                                                         |
| - p_sed_4_irredips_iim                         |  | recycling of sedimentary detritus to ammonium using iron hydroxide (iron reduction)                                                         |
| - p_i3i_4_irred_i2i                            |  | recycling of sedimentary detritus to ammonium using iron-III in clay minerals (iron reduction)                                              |
| - p_sed_4_removal                              |  | transport from fluffy layer to deep basins                                                                                                  |
| - p_sed_4_sulfdeep_nh4                         |  | parameterization for recycling of sedimentary detritus to ammonium below the deepest sediment layer (sulfate reduction / methane formation) |

#### Change of: sedimentary detritus fractions\_5

|                             |  |                                                                                           |
|-----------------------------|--|-------------------------------------------------------------------------------------------|
| $\frac{d}{dt} t_{sed\_5} =$ |  |                                                                                           |
| + p_det_5_sedi_sed          |  | detritus sedimentation                                                                    |
| - p_sed_5_resp_nh4          |  | recycling of sedimentary detritus to ammonium using oxygen (respiration)                  |
| - p_sed_5_denit_nh4         |  | recycling of sedimentary detritus to ammonium using nitrate (denitrification)             |
| - p_sed_5_sulf_nh4          |  | recycling of sedimentary detritus to ammonium using sulfate (sulfate reduction)           |
| - p_sed_5_ero_det           |  | sedimentary detritus erosion                                                              |
| - p_sed_5_biores_det        |  | bio resuspension of sedimentary detritus                                                  |
| - p_sed_5_mnred_mn2         |  | recycling of sedimentary detritus to ammonium using manganese oxide (manganese reduction) |
| - p_sed_5_irred_ims         |  | recycling of sedimentary detritus to ammonium using iron hydroxide (iron reduction)       |
| - p_sed_5_irredips_ims      |  | recycling of sedimentary detritus to ammonium using iron phosphate (iron reduction)       |
| - p_sed_5_irred_iim         |  | recycling of sedimentary detritus to ammonium using iron hydroxide (iron reduction)       |

continued on next page...

## Tracer equations, continued from previous page

|                        |                                                                                                                                             |
|------------------------|---------------------------------------------------------------------------------------------------------------------------------------------|
| - p_sed_5_irredips_iim | recycling of sedimentary detritus to ammonium using iron hydroxide (iron reduction)                                                         |
| - p_i3i_5_irred_i2i    | recycling of sedimentary detritus to ammonium using iron-III in clay minerals (iron reduction)                                              |
| - p_sed_5_removal      | transport from fluffy layer to deep basins                                                                                                  |
| - p_sed_5_sulfdeep_nh4 | parameterization for recycling of sedimentary detritus to ammonium below the deepest sediment layer (sulfate reduction / methane formation) |

## Change of: sedimentary detritus fractions\_6

|                             |                                                                                           |
|-----------------------------|-------------------------------------------------------------------------------------------|
| $\frac{d}{dt} t_{sed\_6} =$ |                                                                                           |
| + p_det_6_sedi_sed          | detritus sedimentation                                                                    |
| - p_sed_6_resp_nh4          | recycling of sedimentary detritus to ammonium using oxygen (respiration)                  |
| - p_sed_6_denit_nh4         | recycling of sedimentary detritus to ammonium using nitrate (denitrification)             |
| - p_sed_6_sulf_nh4          | recycling of sedimentary detritus to ammonium using sulfate (sulfate reduction)           |
| - p_sed_6_ero_det           | sedimentary detritus erosion                                                              |
| - p_sed_6_biores_det        | bio resuspension of sedimentary detritus                                                  |
| - p_sed_6_mnred_mn2         | recycling of sedimentary detritus to ammonium using manganese oxide (manganese reduction) |
| - p_sed_6_irred_ims         | recycling of sedimentary detritus to ammonium using iron hydroxide (iron reduction)       |
| - p_sed_6_irredips_ims      | recycling of sedimentary detritus to ammonium using iron phosphate (iron reduction)       |
| - p_sed_6_irred_iim         | recycling of sedimentary detritus to ammonium using iron hydroxide (iron reduction)       |

continued on next page...

## Tracer equations, continued from previous page

|                        |                                                                                                                                             |
|------------------------|---------------------------------------------------------------------------------------------------------------------------------------------|
| - p_sed_6_irredips_iim | recycling of sedimentary detritus to ammonium using iron hydroxide (iron reduction)                                                         |
| - p_i3i_6_irred_i2i    | recycling of sedimentary detritus to ammonium using iron-III in clay minerals (iron reduction)                                              |
| - p_sed_6_removal      | transport from fluffy layer to deep basins                                                                                                  |
| - p_sed_6_sulfdeep_nh4 | parameterization for recycling of sedimentary detritus to ammonium below the deepest sediment layer (sulfate reduction / methane formation) |

## Change of: iron hydroxide in the sediment

|                                                    |                                                                                     |
|----------------------------------------------------|-------------------------------------------------------------------------------------|
| $\frac{d}{dt} t_{ihs} =$                           |                                                                                     |
| + p_ihw_sedi_ihs                                   | sedimentation of iron hydroxide                                                     |
| + p_fe2_ox_ihs                                     | oxidation of Fe <sup>2+</sup> to iron hydroxide in the sediment                     |
| + p_ips_diss_po4                                   | dissolution of iron phosphate                                                       |
| + p_pyr_oxmos_ihs                                  | oxidation of pyrite by manganese oxide to iron oxyhydroxide                         |
| + p_pyr_oxo2_ihs                                   | oxidation of pyrite by manganese oxide to iron oxyhydroxide                         |
| + p_imm_oxo2_ihs                                   | oxidation of minnesotaite by oxygen to iron oxyhydroxide                            |
| + (p_fe2_mnox_ihs)*(2.0)                           | oxidation of Fe <sup>2+</sup> by reduction of MnO <sub>2</sub>                      |
| + p_ims_oxo2_ihs                                   | iron monosulfide oxidation to iron oxihydroxides                                    |
| - p_ihs_ero_ihw                                    | erosion of iron PO <sub>4</sub>                                                     |
| - p_ihs_biores_ihw                                 | bio resuspension of iron hydroxyde                                                  |
| - (p_sed_1_irred_ims)*(26.5*rfr_pc_enrichment_det) | recycling of sedimentary detritus to ammonium using iron hydroxide (iron reduction) |

continued on next page...

| Tracer equations, continued from previous page     |                                                                                     |
|----------------------------------------------------|-------------------------------------------------------------------------------------|
| - (p_sed_2_irred_ims)*(26.5*rfr_pc_enrichment_det) | recycling of sedimentary detritus to ammonium using iron hydroxide (iron reduction) |
| - (p_sed_3_irred_ims)*(26.5*rfr_pc_enrichment_det) | recycling of sedimentary detritus to ammonium using iron hydroxide (iron reduction) |
| - (p_sed_4_irred_ims)*(26.5*rfr_pc_enrichment_det) | recycling of sedimentary detritus to ammonium using iron hydroxide (iron reduction) |
| - (p_sed_5_irred_ims)*(26.5*rfr_pc_enrichment_det) | recycling of sedimentary detritus to ammonium using iron hydroxide (iron reduction) |
| - (p_sed_6_irred_ims)*(26.5*rfr_pc_enrichment_det) | recycling of sedimentary detritus to ammonium using iron hydroxide (iron reduction) |
| - (p_sed_1_irred_iim)*(26.5*rfr_pc_enrichment_det) | recycling of sedimentary detritus to ammonium using iron hydroxide (iron reduction) |
| - (p_sed_2_irred_iim)*(26.5*rfr_pc_enrichment_det) | recycling of sedimentary detritus to ammonium using iron hydroxide (iron reduction) |
| - (p_sed_3_irred_iim)*(26.5*rfr_pc_enrichment_det) | recycling of sedimentary detritus to ammonium using iron hydroxide (iron reduction) |
| - (p_sed_4_irred_iim)*(26.5*rfr_pc_enrichment_det) | recycling of sedimentary detritus to ammonium using iron hydroxide (iron reduction) |
| - (p_sed_5_irred_iim)*(26.5*rfr_pc_enrichment_det) | recycling of sedimentary detritus to ammonium using iron hydroxide (iron reduction) |
| - (p_sed_6_irred_iim)*(26.5*rfr_pc_enrichment_det) | recycling of sedimentary detritus to ammonium using iron hydroxide (iron reduction) |
| - (p_ihs_red_iim)*(8.0)                            | reduction of sedimentary iron hydroxide to iron-II                                  |
| - (p_ihs_red_ims)*(8.0)                            | reduction of sedimentary iron hydroxide to iron-II                                  |
| - p_po4_ads_ips                                    | adsorption of phosphate to iron hydroxide particles                                 |
| - p_ihs_removal                                    | transport from fluffy layer to deep basins                                          |
| - p_ihs_trans_ihc                                  | transformation of amorphous iron oxyhydroxides to crystalline phase                 |
| continued on next page...                          |                                                                                     |

## Tracer equations, continued from previous page

**Change of: suspended iron hydroxide**

$$\begin{aligned}
\frac{d}{dt} t_{ihw} = & \\
& + \text{erosion of iron PO4} \\
& p_{ihs\_ero\_ihw}/(cgt\_cellheight* \\
& cgt\_density) \\
& + \text{erosion of larger-crystalline iron PO4} \\
& p_{ihc\_ero\_ihw}/(cgt\_cellheight* \\
& cgt\_density) \\
& + \text{bio resuspension of iron hydroxyde} \\
& p_{ihs\_biores\_ihw}/(cgt\_cellheig \\
& cgt\_density) \\
& + \text{bio resuspension of iron hydroxyde} \\
& p_{ihc\_biores\_ihw}/(cgt\_cellheig \\
& cgt\_density) \\
& + p_{fe2\_ox\_ihw} \quad \text{oxidation of Fe2+ to iron hydroxide in the} \\
& \quad \text{sediment} \\
& + p_{ipw\_diss\_po4} \quad \text{dissolution of iron phosphate} \\
& + \text{bio resuspension of iron monosulfide} \\
& p_{ims\_biores\_ihw}/(cgt\_cellheig \\
& cgt\_density) \\
& + \text{bio resuspension of pyrite} \\
& p_{pyr\_biores\_ihw}/(cgt\_cellheig \\
& cgt\_density) \\
& + \text{bio resuspension of iron in clay minerals} \\
& p_{iim\_biores\_ihw}/(cgt\_cellheig \\
& cgt\_density) \\
& + \text{resuspension of iron monosulfide} \\
& p_{ims\_ero\_ihw}/(cgt\_cellheight* \\
& cgt\_density) \\
& + \text{resuspension of pyrite} \\
& p_{pyr\_ero\_ihw}/(cgt\_cellheight* \\
& cgt\_density)
\end{aligned}$$

continued on next page...

## Tracer equations, continued from previous page

$$\begin{aligned}
& + \text{bio resuspension of iron in clay minerals} \\
& p_{iim\_ero\_ihw}/(cgt\_cellheight* \\
& cgt\_density) \\
& + \text{iron hydroxide generation by internal sources} \\
& p_{stf\_ihw\_3d}/(cgt\_cellheight* \\
& cgt\_density) \\
& - \text{sedimentation of iron hydroxide} \\
& p_{ihw\_sedi\_ihs}/(cgt\_cellheight \\
& cgt\_density) \\
& - p_{po4\_ads\_ipw} \quad \text{adsorption of phosphate to iron hydroxide} \\
& \quad \quad \quad \text{particles}
\end{aligned}$$

## Change of: ferrous iron

$$\begin{aligned}
\frac{d}{dt} t_{fe2} = & \\
& + \text{dissolution of magnetite to iron II} \\
& p_{ims\_diss\_fe2}/(cgt\_cellheight(precipitating iron hydroxides) \\
& cgt\_density) \\
& + \text{dissolution minnesotaite to of iron-II} \\
& p_{iim\_diss\_fe2}/(cgt\_cellheight \\
& cgt\_density) \\
& - \text{oxidation of Fe2+ to iron hydroxide in the} \\
& p_{fe2\_ox\_ihs}/(cgt\_cellheight* sediment \\
& cgt\_density) \\
& - p_{fe2\_ox\_ihw} \quad \text{oxidation of Fe2+ to iron hydroxide in the} \\
& \quad \quad \quad \text{sediment} \\
& - \text{precipitation of iron II as siderite} \\
& p_{fe2\_prec\_ims}/(cgt\_cellheight \\
& cgt\_density) \\
& - \text{precipitation of iron II as minnesotaite} \\
& p_{fe2\_prec\_iim}/(cgt\_cellheight \\
& cgt\_density) \\
& - (p_{fe2\_mnox\_ihs})*(2.0) \quad \text{oxidation of Fe2+ by reduction of MnO2} \\
& /(cgt\_cellheight*cgt\_density)
\end{aligned}$$

continued on next page...

## Tracer equations, continued from previous page

## Change of: pyrite

|                                 |                                                             |
|---------------------------------|-------------------------------------------------------------|
| $\frac{d}{dt} t_{\text{pyr}} =$ |                                                             |
| + p_ims_form2_pyr               | pyrite formation from iron monosulfide                      |
| - p_pyr_removal                 | transport from fluffy layer to deep basins                  |
| - p_pyr_oxmos_ihs               | oxidation of pyrite by manganese oxide to iron oxyhydroxide |
| - p_pyr_oxo2_ihs                | oxidation of pyrite by manganese oxide to iron oxyhydroxide |
| - p_pyr_biores_ihw              | bio resuspension of pyrite                                  |
| - p_pyr_ero_ihw                 | resuspension of pyrite                                      |

## Change of: iron monosulphide

|                                                       |                                                                                     |
|-------------------------------------------------------|-------------------------------------------------------------------------------------|
| $\frac{d}{dt} t_{\text{ims}} =$                       |                                                                                     |
| + (p_sed_1_irred_ims)*(26.5*rfr_pc_enrichment_det)    | recycling of sedimentary detritus to ammonium using iron hydroxide (iron reduction) |
| + (p_sed_2_irred_ims)*(26.5*rfr_pc_enrichment_det)    | recycling of sedimentary detritus to ammonium using iron hydroxide (iron reduction) |
| + (p_sed_3_irred_ims)*(26.5*rfr_pc_enrichment_det)    | recycling of sedimentary detritus to ammonium using iron hydroxide (iron reduction) |
| + (p_sed_4_irred_ims)*(26.5*rfr_pc_enrichment_det)    | recycling of sedimentary detritus to ammonium using iron hydroxide (iron reduction) |
| + (p_sed_5_irred_ims)*(26.5*rfr_pc_enrichment_det)    | recycling of sedimentary detritus to ammonium using iron hydroxide (iron reduction) |
| + (p_sed_6_irred_ims)*(26.5*rfr_pc_enrichment_det)    | recycling of sedimentary detritus to ammonium using iron hydroxide (iron reduction) |
| + (p_sed_1_irredips_ims)*(26.5*rfr_pc_enrichment_det) | recycling of sedimentary detritus to ammonium using iron phosphate (iron reduction) |
| + (p_sed_2_irredips_ims)*(26.5*rfr_pc_enrichment_det) | recycling of sedimentary detritus to ammonium using iron phosphate (iron reduction) |
| + (p_sed_3_irredips_ims)*(26.5*rfr_pc_enrichment_det) | recycling of sedimentary detritus to ammonium using iron phosphate (iron reduction) |

continued on next page...



## Tracer equations, continued from previous page

|                                                           |                                                                                        |
|-----------------------------------------------------------|----------------------------------------------------------------------------------------|
| + (p_sed_4_irredips_ims)*<br>(26.5*rfr_pc_enrichment_det) | recycling of sedimentary detritus to ammonium<br>using iron phosphate (iron reduction) |
| + (p_sed_5_irredips_ims)*<br>(26.5*rfr_pc_enrichment_det) | recycling of sedimentary detritus to ammonium<br>using iron phosphate (iron reduction) |
| + (p_sed_6_irredips_ims)*<br>(26.5*rfr_pc_enrichment_det) | recycling of sedimentary detritus to ammonium<br>using iron phosphate (iron reduction) |
| + (p_ihs_red_ims)*(8.0)                                   | reduction of sedimentary iron hydroxide to<br>iron-II                                  |
| + p_fe2_prec_ims                                          | precipitation of iron II as siderite                                                   |
| + p_iim_trans_ims                                         | minnesotaite transformation to iron<br>monosulfide                                     |
| + (p_ihc_red_ims)*(8.0)                                   | reduction of sedimentary iron hydroxide to<br>iron-II                                  |
| - p_ims_removal                                           | transport from fluffy layer to deep basins                                             |
| - p_ims_diss_fe2                                          | dissolution of magnetite to iron II<br>(precipitating iron hydroxides)                 |
| - p_ims_trans_iim                                         | iron monosulfide transformation to<br>minnesotaite                                     |
| - p_ims_form2_pyr                                         | pyrite formation from iron monosulfide                                                 |
| - p_ims_oxo2_ihs                                          | iron monosulfide oxidation to iron<br>oxihydroxides                                    |
| - p_ims_biores_ihw                                        | bio resuspension of iron monosulfide                                                   |
| - p_ims_ero_ihw                                           | resuspension of iron monosulfide                                                       |

## Change of: dissolved calcium

|                                                           |                                                                                                  |
|-----------------------------------------------------------|--------------------------------------------------------------------------------------------------|
| $\frac{d}{dt} t_{ca2} =$                                  |                                                                                                  |
| + p_ca2_relax_upwards                                     | raise Ca <sup>2+</sup> concentration in the water column<br>to salinity-determined default value |
| + (p_rho_diss_mn2)*(0.6)<br>/(cgt_cellheight*cgt_density) | rhodochrosite dissolution to manganese-II                                                        |

continued on next page...

## Tracer equations, continued from previous page

|                                                             |                                                                                                  |
|-------------------------------------------------------------|--------------------------------------------------------------------------------------------------|
| + (p_rho_biores_mow)*(0.6)<br>/(cgt_cellheight*cgt_density) | bio resuspension of rhodochrosite                                                                |
| + (p_rho_ero_mow)*(0.6)<br>/(cgt_cellheight*cgt_density)    | bio resuspension of rhodochrosite                                                                |
| - p_ca2_relax_downwards                                     | lower Ca <sup>2+</sup> concentration in the water column<br>to salinity-determined default value |
| - (p_mn2_prec_rho)*(0.6)<br>/(cgt_cellheight*cgt_density)   | manganese-II precipitation to rhodochrosite                                                      |

## Change of: manganese oxide in the sediments

|                                                         |                                                                                              |
|---------------------------------------------------------|----------------------------------------------------------------------------------------------|
| $\frac{d}{dt} t_{mos} =$                                |                                                                                              |
| + p_mow_sedi_mos                                        | sedimentation of iron hydroxide                                                              |
| + p_mn2_ox_mos                                          | oxidation of Mn <sup>2+</sup> to manganese oxide in the<br>sediment                          |
| - (p_sed_1_mnred_mn2)*(13.25*<br>rfr_pc_enrichment_det) | recycling of sedimentary detritus to ammonium<br>using manganese oxide (manganese reduction) |
| - (p_sed_2_mnred_mn2)*(13.25*<br>rfr_pc_enrichment_det) | recycling of sedimentary detritus to ammonium<br>using manganese oxide (manganese reduction) |
| - (p_sed_3_mnred_mn2)*(13.25*<br>rfr_pc_enrichment_det) | recycling of sedimentary detritus to ammonium<br>using manganese oxide (manganese reduction) |
| - (p_sed_4_mnred_mn2)*(13.25*<br>rfr_pc_enrichment_det) | recycling of sedimentary detritus to ammonium<br>using manganese oxide (manganese reduction) |
| - (p_sed_5_mnred_mn2)*(13.25*<br>rfr_pc_enrichment_det) | recycling of sedimentary detritus to ammonium<br>using manganese oxide (manganese reduction) |
| - (p_sed_6_mnred_mn2)*(13.25*<br>rfr_pc_enrichment_det) | recycling of sedimentary detritus to ammonium<br>using manganese oxide (manganese reduction) |
| - p_mos_removal                                         | transport from fluffy layer to deep basins                                                   |
| - p_pyr_oxmos_ihs                                       | oxidation of pyrite by manganese oxide to iron<br>oxyhydroxide                               |
| - p_fe2_mnox_ihs                                        | oxidation of Fe <sup>2+</sup> by reduction of MnO <sub>2</sub>                               |

continued on next page...

## Tracer equations, continued from previous page

- p\_h2s\_mnox\_so4                      oxidation of h2s by reduction of MnO2
- p\_mos\_biores\_mow                    bio resuspension of manganese oxide
- p\_mos\_ero\_mow                        bio resuspension of manganese oxide

## Change of: suspended manganese oxide

$$\begin{aligned} \frac{d}{dt} t_{\text{mow}} = & \\ & + \text{bio resuspension of manganese oxide} \\ & p_{\text{mos\_biores\_mow}} / (cgt\_cellheight \\ & cgt\_density) \\ & + \text{bio resuspension of rhodochrosite} \\ & p_{\text{rho\_biores\_mow}} / (cgt\_cellheight \\ & cgt\_density) \\ & + \text{bio resuspension of manganese oxide} \\ & p_{\text{mos\_ero\_mow}} / (cgt\_cellheight * \\ & cgt\_density) \\ & + \text{bio resuspension of rhodochrosite} \\ & p_{\text{rho\_ero\_mow}} / (cgt\_cellheight * \\ & cgt\_density) \\ & - \text{sedimentation of iron hydroxide} \\ & p_{\text{mow\_sedi\_mos}} / (cgt\_cellheight \\ & cgt\_density) \end{aligned}$$

## Change of: dissolved manganese-II

$$\begin{aligned} \frac{d}{dt} t_{\text{mn2}} = & \\ & + (p_{\text{sed\_1\_mnred\_mn2}}) * (13.25 * \text{recycling of sedimentary detritus to ammonium} \\ & rfr\_pc\_enrichment\_det) \text{ using manganese oxide (manganese reduction)} \\ & / (cgt\_cellheight * cgt\_density) \\ & + (p_{\text{sed\_2\_mnred\_mn2}}) * (13.25 * \text{recycling of sedimentary detritus to ammonium} \\ & rfr\_pc\_enrichment\_det) \text{ using manganese oxide (manganese reduction)} \\ & / (cgt\_cellheight * cgt\_density) \\ & + (p_{\text{sed\_3\_mnred\_mn2}}) * (13.25 * \text{recycling of sedimentary detritus to ammonium} \\ & rfr\_pc\_enrichment\_det) \text{ using manganese oxide (manganese reduction)} \\ & / (cgt\_cellheight * cgt\_density) \end{aligned}$$

continued on next page...

## Tracer equations, continued from previous page

```

+ (p_sed_4_mnred_mn2)*(13.25* recycling of sedimentary detritus to ammonium
rfr_pc_enrichment_det)          using manganese oxide (manganese reduction)
/(cgt_cellheight*cgt_density)

+ (p_sed_5_mnred_mn2)*(13.25* recycling of sedimentary detritus to ammonium
rfr_pc_enrichment_det)          using manganese oxide (manganese reduction)
/(cgt_cellheight*cgt_density)

+ (p_sed_6_mnred_mn2)*(13.25* recycling of sedimentary detritus to ammonium
rfr_pc_enrichment_det)          using manganese oxide (manganese reduction)
/(cgt_cellheight*cgt_density)

+                                rhodochrosite dissolution to manganese-II
p_rho_diss_mn2/(cgt_cellheight
cgt_density)

+                                oxidation of pyrite by manganese oxide to iron
p_pyr_oxmos_ihs/(cgt_cellheightoxyhydroxide
cgt_density)

+                                oxidation of Fe2+ by reduction of MnO2
p_fe2_mnox_ihs/(cgt_cellheight
cgt_density)

+                                oxidation of h2s by reduction of MnO2
p_h2s_mnox_so4/(cgt_cellheight
cgt_density)

-                                oxidation of Mn2+ to manganese oxide in the
p_mn2_ox_mos/(cgt_cellheight* sediment
cgt_density)

-                                manganese-II precipitation to rhodochrosite
p_mn2_prec_rho/(cgt_cellheight
cgt_density)

```

## Change of: rhodochrosite

```

 $\frac{d}{dt} t\_rho =$ 
+ p_mn2_prec_rho          manganese-II precipitation to rhodochrosite

- t_rho_removal          transport from fluffy layer to deep basins

- p_rho_diss_mn2          rhodochrosite dissolution to manganese-II

```

continued on next page...

## Tracer equations, continued from previous page

- p\_rho\_biores\_mow                      bio resuspension of rhodochrosite
- p\_rho\_ero\_mow                        bio resuspension of rhodochrosite

**Change of: OH- ions with realistically quick diffusion**

$$\frac{d}{dt} t_{ohm\_quickdiff} =$$

- + relax\_ohm\_quickdiff\_up              relax ohm\_quickdiff tracer against actual OH-concentration
- relax\_ohm\_quickdiff\_down            relax ohm\_quickdiff tracer against actual OH-concentration

**Change of: OH- ions which move unrealistically slow with alkalinity**

$$\frac{d}{dt} t_{ohm\_slowdiff} =$$

- + relax\_ohm\_slowdiff\_up              relax ohm\_slowdiff tracer against actual OH-concentration
- relax\_ohm\_slowdiff\_down            relax ohm\_slowdiff tracer against actual OH-concentration

**Change of: silicate**

$$\frac{d}{dt} t_{sil} =$$

- + (p\_sed\_1\_resp\_nh4)\*(rfr\_si) recycling of sedimentary detritus to ammonium / (cgt\_cellheight\*cgt\_density) using oxygen (respiration)
- + (p\_sed\_2\_resp\_nh4)\*(rfr\_si) recycling of sedimentary detritus to ammonium / (cgt\_cellheight\*cgt\_density) using oxygen (respiration)
- + (p\_sed\_3\_resp\_nh4)\*(rfr\_si) recycling of sedimentary detritus to ammonium / (cgt\_cellheight\*cgt\_density) using oxygen (respiration)
- + (p\_sed\_4\_resp\_nh4)\*(rfr\_si) recycling of sedimentary detritus to ammonium / (cgt\_cellheight\*cgt\_density) using oxygen (respiration)
- + (p\_sed\_5\_resp\_nh4)\*(rfr\_si) recycling of sedimentary detritus to ammonium / (cgt\_cellheight\*cgt\_density) using oxygen (respiration)
- + (p\_sed\_6\_resp\_nh4)\*(rfr\_si) recycling of sedimentary detritus to ammonium / (cgt\_cellheight\*cgt\_density) using oxygen (respiration)
- + (p\_sed\_1\_denit\_nh4)\*              recycling of sedimentary detritus to ammonium  
(rfr\_si)/(cgt\_cellheight\*              using nitrate (denitrification)  
cgt\_density)

continued on next page...

## Tracer equations, continued from previous page

|                                                                     |                                                                                              |
|---------------------------------------------------------------------|----------------------------------------------------------------------------------------------|
| + (p_sed_2_denit_nh4)*<br>(rfr_si)/(cgt_cellheight*<br>cgt_density) | recycling of sedimentary detritus to ammonium<br>using nitrate (denitrification)             |
| + (p_sed_3_denit_nh4)*<br>(rfr_si)/(cgt_cellheight*<br>cgt_density) | recycling of sedimentary detritus to ammonium<br>using nitrate (denitrification)             |
| + (p_sed_4_denit_nh4)*<br>(rfr_si)/(cgt_cellheight*<br>cgt_density) | recycling of sedimentary detritus to ammonium<br>using nitrate (denitrification)             |
| + (p_sed_5_denit_nh4)*<br>(rfr_si)/(cgt_cellheight*<br>cgt_density) | recycling of sedimentary detritus to ammonium<br>using nitrate (denitrification)             |
| + (p_sed_6_denit_nh4)*<br>(rfr_si)/(cgt_cellheight*<br>cgt_density) | recycling of sedimentary detritus to ammonium<br>using nitrate (denitrification)             |
| + (p_sed_1_sulf_nh4)*(rfr_si)<br>/(cgt_cellheight*cgt_density)      | recycling of sedimentary detritus to ammonium<br>using sulfate (sulfate reduction)           |
| + (p_sed_2_sulf_nh4)*(rfr_si)<br>/(cgt_cellheight*cgt_density)      | recycling of sedimentary detritus to ammonium<br>using sulfate (sulfate reduction)           |
| + (p_sed_3_sulf_nh4)*(rfr_si)<br>/(cgt_cellheight*cgt_density)      | recycling of sedimentary detritus to ammonium<br>using sulfate (sulfate reduction)           |
| + (p_sed_4_sulf_nh4)*(rfr_si)<br>/(cgt_cellheight*cgt_density)      | recycling of sedimentary detritus to ammonium<br>using sulfate (sulfate reduction)           |
| + (p_sed_5_sulf_nh4)*(rfr_si)<br>/(cgt_cellheight*cgt_density)      | recycling of sedimentary detritus to ammonium<br>using sulfate (sulfate reduction)           |
| + (p_sed_6_sulf_nh4)*(rfr_si)<br>/(cgt_cellheight*cgt_density)      | recycling of sedimentary detritus to ammonium<br>using sulfate (sulfate reduction)           |
| + (p_sed_1_mnred_mn2)*<br>(rfr_si)/(cgt_cellheight*<br>cgt_density) | recycling of sedimentary detritus to ammonium<br>using manganese oxide (manganese reduction) |
| + (p_sed_2_mnred_mn2)*<br>(rfr_si)/(cgt_cellheight*<br>cgt_density) | recycling of sedimentary detritus to ammonium<br>using manganese oxide (manganese reduction) |

continued on next page...

## Tracer equations, continued from previous page

|                                                                        |                                                                                              |
|------------------------------------------------------------------------|----------------------------------------------------------------------------------------------|
| + (p_sed_3_mnred_mn2)*<br>(rfr_si)/(cgt_cellheight*<br>cgt_density)    | recycling of sedimentary detritus to ammonium<br>using manganese oxide (manganese reduction) |
| + (p_sed_4_mnred_mn2)*<br>(rfr_si)/(cgt_cellheight*<br>cgt_density)    | recycling of sedimentary detritus to ammonium<br>using manganese oxide (manganese reduction) |
| + (p_sed_5_mnred_mn2)*<br>(rfr_si)/(cgt_cellheight*<br>cgt_density)    | recycling of sedimentary detritus to ammonium<br>using manganese oxide (manganese reduction) |
| + (p_sed_6_mnred_mn2)*<br>(rfr_si)/(cgt_cellheight*<br>cgt_density)    | recycling of sedimentary detritus to ammonium<br>using manganese oxide (manganese reduction) |
| + (p_sed_1_irred_ims)*<br>(rfr_si)/(cgt_cellheight*<br>cgt_density)    | recycling of sedimentary detritus to ammonium<br>using iron hydroxide (iron reduction)       |
| + (p_sed_2_irred_ims)*<br>(rfr_si)/(cgt_cellheight*<br>cgt_density)    | recycling of sedimentary detritus to ammonium<br>using iron hydroxide (iron reduction)       |
| + (p_sed_3_irred_ims)*<br>(rfr_si)/(cgt_cellheight*<br>cgt_density)    | recycling of sedimentary detritus to ammonium<br>using iron hydroxide (iron reduction)       |
| + (p_sed_4_irred_ims)*<br>(rfr_si)/(cgt_cellheight*<br>cgt_density)    | recycling of sedimentary detritus to ammonium<br>using iron hydroxide (iron reduction)       |
| + (p_sed_5_irred_ims)*<br>(rfr_si)/(cgt_cellheight*<br>cgt_density)    | recycling of sedimentary detritus to ammonium<br>using iron hydroxide (iron reduction)       |
| + (p_sed_6_irred_ims)*<br>(rfr_si)/(cgt_cellheight*<br>cgt_density)    | recycling of sedimentary detritus to ammonium<br>using iron hydroxide (iron reduction)       |
| + (p_sed_1_irredips_ims)*<br>(rfr_si)/(cgt_cellheight*<br>cgt_density) | recycling of sedimentary detritus to ammonium<br>using iron phosphate (iron reduction)       |

continued on next page...

## Tracer equations, continued from previous page

|                                                                        |                                                                                        |
|------------------------------------------------------------------------|----------------------------------------------------------------------------------------|
| + (p_sed_2_irredips_ims)*<br>(rfr_si)/(cgt_cellheight*<br>cgt_density) | recycling of sedimentary detritus to ammonium<br>using iron phosphate (iron reduction) |
| + (p_sed_3_irredips_ims)*<br>(rfr_si)/(cgt_cellheight*<br>cgt_density) | recycling of sedimentary detritus to ammonium<br>using iron phosphate (iron reduction) |
| + (p_sed_4_irredips_ims)*<br>(rfr_si)/(cgt_cellheight*<br>cgt_density) | recycling of sedimentary detritus to ammonium<br>using iron phosphate (iron reduction) |
| + (p_sed_5_irredips_ims)*<br>(rfr_si)/(cgt_cellheight*<br>cgt_density) | recycling of sedimentary detritus to ammonium<br>using iron phosphate (iron reduction) |
| + (p_sed_6_irredips_ims)*<br>(rfr_si)/(cgt_cellheight*<br>cgt_density) | recycling of sedimentary detritus to ammonium<br>using iron phosphate (iron reduction) |
| + (p_sed_1_irred_iim)*<br>(rfr_si)/(cgt_cellheight*<br>cgt_density)    | recycling of sedimentary detritus to ammonium<br>using iron hydroxide (iron reduction) |
| + (p_sed_2_irred_iim)*<br>(rfr_si)/(cgt_cellheight*<br>cgt_density)    | recycling of sedimentary detritus to ammonium<br>using iron hydroxide (iron reduction) |
| + (p_sed_3_irred_iim)*<br>(rfr_si)/(cgt_cellheight*<br>cgt_density)    | recycling of sedimentary detritus to ammonium<br>using iron hydroxide (iron reduction) |
| + (p_sed_4_irred_iim)*<br>(rfr_si)/(cgt_cellheight*<br>cgt_density)    | recycling of sedimentary detritus to ammonium<br>using iron hydroxide (iron reduction) |
| + (p_sed_5_irred_iim)*<br>(rfr_si)/(cgt_cellheight*<br>cgt_density)    | recycling of sedimentary detritus to ammonium<br>using iron hydroxide (iron reduction) |
| + (p_sed_6_irred_iim)*<br>(rfr_si)/(cgt_cellheight*<br>cgt_density)    | recycling of sedimentary detritus to ammonium<br>using iron hydroxide (iron reduction) |

continued on next page...



## Tracer equations, continued from previous page

|                                                                        |                                                                                                   |
|------------------------------------------------------------------------|---------------------------------------------------------------------------------------------------|
| + (p_sed_1_irredips_iim)*<br>(rfr_si)/(cgt_cellheight*<br>cgt_density) | recycling of sedimentary detritus to ammonium<br>using iron hydroxide (iron reduction)            |
| + (p_sed_2_irredips_iim)*<br>(rfr_si)/(cgt_cellheight*<br>cgt_density) | recycling of sedimentary detritus to ammonium<br>using iron hydroxide (iron reduction)            |
| + (p_sed_3_irredips_iim)*<br>(rfr_si)/(cgt_cellheight*<br>cgt_density) | recycling of sedimentary detritus to ammonium<br>using iron hydroxide (iron reduction)            |
| + (p_sed_4_irredips_iim)*<br>(rfr_si)/(cgt_cellheight*<br>cgt_density) | recycling of sedimentary detritus to ammonium<br>using iron hydroxide (iron reduction)            |
| + (p_sed_5_irredips_iim)*<br>(rfr_si)/(cgt_cellheight*<br>cgt_density) | recycling of sedimentary detritus to ammonium<br>using iron hydroxide (iron reduction)            |
| + (p_sed_6_irredips_iim)*<br>(rfr_si)/(cgt_cellheight*<br>cgt_density) | recycling of sedimentary detritus to ammonium<br>using iron hydroxide (iron reduction)            |
| + (p_i3i_1_irred_i2i)*<br>(rfr_si)/(cgt_cellheight*<br>cgt_density)    | recycling of sedimentary detritus to ammonium<br>using iron-III in clay minerals (iron reduction) |
| + (p_i3i_2_irred_i2i)*<br>(rfr_si)/(cgt_cellheight*<br>cgt_density)    | recycling of sedimentary detritus to ammonium<br>using iron-III in clay minerals (iron reduction) |
| + (p_i3i_3_irred_i2i)*<br>(rfr_si)/(cgt_cellheight*<br>cgt_density)    | recycling of sedimentary detritus to ammonium<br>using iron-III in clay minerals (iron reduction) |
| + (p_i3i_4_irred_i2i)*<br>(rfr_si)/(cgt_cellheight*<br>cgt_density)    | recycling of sedimentary detritus to ammonium<br>using iron-III in clay minerals (iron reduction) |
| + (p_i3i_5_irred_i2i)*<br>(rfr_si)/(cgt_cellheight*<br>cgt_density)    | recycling of sedimentary detritus to ammonium<br>using iron-III in clay minerals (iron reduction) |

continued on next page...

## Tracer equations, continued from previous page

|                                                                        |                                                                                                                                                      |
|------------------------------------------------------------------------|------------------------------------------------------------------------------------------------------------------------------------------------------|
| + (p_i3i_6_irred_i2i)*<br>(rfr_si)/(cgt_cellheight*<br>cgt_density)    | recycling of sedimentary detritus to ammonium<br>using iron-III in clay minerals (iron reduction)                                                    |
| + (p_sed_1_sulfdeep_nh4)*<br>(rfr_si)/(cgt_cellheight*<br>cgt_density) | parameterization for recycling of sedimentary<br>detritus to ammonium below the deepest<br>sediment layer (sulfate reduction / methane<br>formation) |
| + (p_sed_2_sulfdeep_nh4)*<br>(rfr_si)/(cgt_cellheight*<br>cgt_density) | parameterization for recycling of sedimentary<br>detritus to ammonium below the deepest<br>sediment layer (sulfate reduction / methane<br>formation) |
| + (p_sed_3_sulfdeep_nh4)*<br>(rfr_si)/(cgt_cellheight*<br>cgt_density) | parameterization for recycling of sedimentary<br>detritus to ammonium below the deepest<br>sediment layer (sulfate reduction / methane<br>formation) |
| + (p_sed_4_sulfdeep_nh4)*<br>(rfr_si)/(cgt_cellheight*<br>cgt_density) | parameterization for recycling of sedimentary<br>detritus to ammonium below the deepest<br>sediment layer (sulfate reduction / methane<br>formation) |
| + (p_sed_5_sulfdeep_nh4)*<br>(rfr_si)/(cgt_cellheight*<br>cgt_density) | parameterization for recycling of sedimentary<br>detritus to ammonium below the deepest<br>sediment layer (sulfate reduction / methane<br>formation) |
| + (p_sed_6_sulfdeep_nh4)*<br>(rfr_si)/(cgt_cellheight*<br>cgt_density) | parameterization for recycling of sedimentary<br>detritus to ammonium below the deepest<br>sediment layer (sulfate reduction / methane<br>formation) |
| - p_remove_silicate                                                    | remove silicate in water column as it gets too<br>much                                                                                               |

**Change of: iron-II adsorbed to illite-montmorillonite mixed layer minerals**

|                                                        |                                                                                        |
|--------------------------------------------------------|----------------------------------------------------------------------------------------|
| $\frac{d}{dt} t_{iim} =$                               |                                                                                        |
| + (p_sed_1_irred_iim)*(26.5*<br>rfr_pc_enrichment_det) | recycling of sedimentary detritus to ammonium<br>using iron hydroxide (iron reduction) |

continued on next page...

## Tracer equations, continued from previous page

|                                                       |                                                                                     |
|-------------------------------------------------------|-------------------------------------------------------------------------------------|
| + (p_sed_2_irred_iim)*(26.5*rfr_pc_enrichment_det)    | recycling of sedimentary detritus to ammonium using iron hydroxide (iron reduction) |
| + (p_sed_3_irred_iim)*(26.5*rfr_pc_enrichment_det)    | recycling of sedimentary detritus to ammonium using iron hydroxide (iron reduction) |
| + (p_sed_4_irred_iim)*(26.5*rfr_pc_enrichment_det)    | recycling of sedimentary detritus to ammonium using iron hydroxide (iron reduction) |
| + (p_sed_5_irred_iim)*(26.5*rfr_pc_enrichment_det)    | recycling of sedimentary detritus to ammonium using iron hydroxide (iron reduction) |
| + (p_sed_6_irred_iim)*(26.5*rfr_pc_enrichment_det)    | recycling of sedimentary detritus to ammonium using iron hydroxide (iron reduction) |
| + (p_sed_1_irredips_iim)*(26.5*rfr_pc_enrichment_det) | recycling of sedimentary detritus to ammonium using iron hydroxide (iron reduction) |
| + (p_sed_2_irredips_iim)*(26.5*rfr_pc_enrichment_det) | recycling of sedimentary detritus to ammonium using iron hydroxide (iron reduction) |
| + (p_sed_3_irredips_iim)*(26.5*rfr_pc_enrichment_det) | recycling of sedimentary detritus to ammonium using iron hydroxide (iron reduction) |
| + (p_sed_4_irredips_iim)*(26.5*rfr_pc_enrichment_det) | recycling of sedimentary detritus to ammonium using iron hydroxide (iron reduction) |
| + (p_sed_5_irredips_iim)*(26.5*rfr_pc_enrichment_det) | recycling of sedimentary detritus to ammonium using iron hydroxide (iron reduction) |
| + (p_sed_6_irredips_iim)*(26.5*rfr_pc_enrichment_det) | recycling of sedimentary detritus to ammonium using iron hydroxide (iron reduction) |
| + (p_ihs_red_iim)*(8.0)                               | reduction of sedimentary iron hydroxide to iron-II                                  |
| + p_fe2_prec_iim                                      | precipitation of iron II as minnesotaite                                            |
| + p_ims_trans_iim                                     | iron monosulfide transformation to minnesotaite                                     |
| + (p_ihc_red_iim)*(8.0)                               | reduction of sedimentary iron hydroxide to iron-II                                  |

continued on next page. . .

## Tracer equations, continued from previous page

|                    |                                                          |
|--------------------|----------------------------------------------------------|
| - p_iim_removal    | transport from fluffy layer to deep basins               |
| - p_iim_diss_fe2   | dissolution minnesotaite to of iron-II                   |
| - p_iim_trans_ims  | minnesotaite transformation to iron monosulfide          |
| - p_imm_oxo2_ihs   | oxidation of minnesotaite by oxygen to iron oxyhydroxide |
| - p_iim_biores_ihw | bio resuspension of iron in clay minerals                |
| - p_iim_ero_ihw    | bio resuspension of iron in clay minerals                |

**Change of: potentially reducible iron-III in illite-montmorillonite mixed layer minerals**

|                                                    |                                                                                                |
|----------------------------------------------------|------------------------------------------------------------------------------------------------|
| $\frac{d}{dt} t_{i3i} =$                           |                                                                                                |
| + p_i2i_oxo2_i3i                                   | oxidation of iron-II in illite-montmorillonite mixed layer minerals to iron-III                |
| - (p_i3i_1_irred_i2i)*(26.5*rfr_pc_enrichment_det) | recycling of sedimentary detritus to ammonium using iron-III in clay minerals (iron reduction) |
| - (p_i3i_2_irred_i2i)*(26.5*rfr_pc_enrichment_det) | recycling of sedimentary detritus to ammonium using iron-III in clay minerals (iron reduction) |
| - (p_i3i_3_irred_i2i)*(26.5*rfr_pc_enrichment_det) | recycling of sedimentary detritus to ammonium using iron-III in clay minerals (iron reduction) |
| - (p_i3i_4_irred_i2i)*(26.5*rfr_pc_enrichment_det) | recycling of sedimentary detritus to ammonium using iron-III in clay minerals (iron reduction) |
| - (p_i3i_5_irred_i2i)*(26.5*rfr_pc_enrichment_det) | recycling of sedimentary detritus to ammonium using iron-III in clay minerals (iron reduction) |
| - (p_i3i_6_irred_i2i)*(26.5*rfr_pc_enrichment_det) | recycling of sedimentary detritus to ammonium using iron-III in clay minerals (iron reduction) |
| - (p_i3i_redh2s_i2i)*(8)                           | reduction of iron-III in clay minerals to iron-II consuming h2s                                |

**Change of: iron hydroxide in the sediment - crystalline phase**

continued on next page...

## Tracer equations, continued from previous page

|                          |                                                                     |
|--------------------------|---------------------------------------------------------------------|
| $\frac{d}{dt} t_{ihc} =$ |                                                                     |
| + p_ihs_trans_ihc        | transformation of amorphous iron oxyhydroxides to crystalline phase |
| - p_ihc_ero_ihw          | erosion of larger-crystalline iron PO4                              |
| - p_ihc_biores_ihw       | bio resuspension of iron hydroxyde                                  |
| - p_ihc_removal          | transport from fluffy layer to deep basins                          |
| - (p_ihc_red_iim)*(8.0)  | reduction of sedimentary iron hydroxide to iron-II                  |
| - (p_ihc_red_ims)*(8.0)  | reduction of sedimentary iron hydroxide to iron-II                  |

## Change of: phosphate adsorbed to illite-montmorillonite

|                          |                                                                       |
|--------------------------|-----------------------------------------------------------------------|
| $\frac{d}{dt} t_{pim} =$ |                                                                       |
| + p_po4_ads_pim          | phosphate adsorption to illite-montmorillonite mixed layer minerals   |
| - p_pim_lib_po4          | phosphate liberation from illite-montmorillonite mixed layer minerals |

## Change of: ammonium adsorbed to illite-montmorillonite

|                          |                                                                      |
|--------------------------|----------------------------------------------------------------------|
| $\frac{d}{dt} t_{aim} =$ |                                                                      |
| + p_nh4_ads_aim          | ammonium adsorption to illite-montmorillonite mixed layer minerals   |
| - p_aim_lib_nh4          | ammonium liberation from illite-montmorillonite mixed layer minerals |
| - p_aim_nit_no3_sed      | nitrification in the sediment                                        |

## Change of: phosphate in detritus fractions\_1

|                                                        |                                        |
|--------------------------------------------------------|----------------------------------------|
| $\frac{d}{dt} t_{detp\_1} =$                           |                                        |
| + (p_lpp_mort_det_1)*<br>((1.0/rfr_pc_enrichment_det)) | mortality of large-cell phytoplankton  |
| + (p_spp_mort_det_1)*<br>((1.0/rfr_pc_enrichment_det)) | mortality of small-scale phytoplankton |

continued on next page...

## Tracer equations, continued from previous page

$$\begin{aligned}
& + (p\_cya\_mort\_det\_1) * \quad \text{mortality of diazotroph cyanobacteria} \\
& ((1.0/rfr\_pc\_enrichment\_det)) \\
& + (p\_zoo\_mort\_det\_1) * \quad \text{mortality of zooplankton} \\
& ((1.0/rfr\_pc\_enrichment\_det)) \\
& + \quad \text{sedimentary detritus erosion} \\
& p\_sedp\_1\_ero\_detp / (cgt\_cellhei \\
& cgt\_density) \\
& + \quad \text{bio resuspension of sedimentary detritus} \\
& p\_sedp\_1\_biores\_detp / (cgt\_cell \\
& cgt\_density) \\
& + \quad \text{surface flux of detritus} \\
& p\_stf\_det\_1 / (cgt\_cellheight * \\
& cgt\_density) \\
& - \quad \text{detritus sedimentation} \\
& p\_detp\_1\_sedi\_sedp / (cgt\_cellhe \\
& cgt\_density) \\
& - p\_detp\_1\_remin\_po4 \quad \text{recycling of detritus to ammonium using} \\
& \quad \text{oxygen (respiration)}
\end{aligned}$$

## Change of: phosphate in detritus fractions\_\_2

$$\frac{d}{dt} t\_detp\_2 =$$

$$\begin{aligned}
& + (p\_lpp\_mort\_det\_2) * \quad \text{mortality of large-cell phytoplankton} \\
& ((1.0/rfr\_pc\_enrichment\_det)) \\
& + (p\_spp\_mort\_det\_2) * \quad \text{mortality of small-scale phytoplankton} \\
& ((1.0/rfr\_pc\_enrichment\_det)) \\
& + (p\_cya\_mort\_det\_2) * \quad \text{mortality of diazotroph cyanobacteria} \\
& ((1.0/rfr\_pc\_enrichment\_det)) \\
& + (p\_zoo\_mort\_det\_2) * \quad \text{mortality of zooplankton} \\
& ((1.0/rfr\_pc\_enrichment\_det)) \\
& + \quad \text{sedimentary detritus erosion} \\
& p\_sedp\_2\_ero\_detp / (cgt\_cellhei \\
& cgt\_density)
\end{aligned}$$

continued on next page...

## Tracer equations, continued from previous page

```

+                                bio resuspension of sedimentary detritus
p_sedp_2_biores_detp/(cgt_cell
cgt_density)

+                                surface flux of detritus
p_stf_det_2/(cgt_cellheight*
cgt_density)

-                                detritus sedimentation
p_detp_2_sedi_sedp/(cgt_cellhe
cgt_density)

- p_detp_2_remin_po4            recycling of detritus to ammonium using
                                oxygen (respiration)

```

## Change of: phosphate in detritus fractions\_3

```

 $\frac{d}{dt}$  t_detp_3 =
+ (p_lpp_mort_det_3)*          mortality of large-cell phytoplankton
((1.0/rfr_pc_enrichment_det))

+ (p_spp_mort_det_3)*          mortality of small-scale phytoplankton
((1.0/rfr_pc_enrichment_det))

+ (p_cya_mort_det_3)*          mortality of diazotroph cyanobacteria
((1.0/rfr_pc_enrichment_det))

+ (p_zoo_mort_det_3)*          mortality of zooplankton
((1.0/rfr_pc_enrichment_det))

+                                sedimentary detritus erosion
p_sedp_3_ero_detp/(cgt_cellhei
cgt_density)

+                                bio resuspension of sedimentary detritus
p_sedp_3_biores_detp/(cgt_cell
cgt_density)

+                                surface flux of detritus
p_stf_det_3/(cgt_cellheight*
cgt_density)

-                                detritus sedimentation
p_detp_3_sedi_sedp/(cgt_cellhe
cgt_density)

```

continued on next page...

## Tracer equations, continued from previous page

- p\_detp\_3\_remin\_po4                      recycling of detritus to ammonium using  
oxygen (respiration)

**Change of: phosphate in detritus fractions\_4**

$$\frac{d}{dt} t\_detp\_4 =$$

+ (p\_lpp\_mort\_det\_4)\*                      mortality of large-cell phytoplankton  
((1.0/rfr\_pc\_enrichment\_det))

+ (p\_spp\_mort\_det\_4)\*                      mortality of small-scale phytoplankton  
((1.0/rfr\_pc\_enrichment\_det))

+ (p\_cya\_mort\_det\_4)\*                      mortality of diazotroph cyanobacteria  
((1.0/rfr\_pc\_enrichment\_det))

+ (p\_zoo\_mort\_det\_4)\*                      mortality of zooplankton  
((1.0/rfr\_pc\_enrichment\_det))

+                                                      sedimentary detritus erosion  
p\_sedp\_4\_ero\_detp/(cgt\_cellhei  
cgt\_density)

+                                                      bio resuspension of sedimentary detritus  
p\_sedp\_4\_biores\_detp/(cgt\_cell  
cgt\_density)

+                                                      surface flux of detritus  
p\_stf\_det\_4/(cgt\_cellheight\*  
cgt\_density)

-                                                      detritus sedimentation  
p\_detp\_4\_sedi\_sedp/(cgt\_cellhe  
cgt\_density)

- p\_detp\_4\_remin\_po4                      recycling of detritus to ammonium using  
oxygen (respiration)

**Change of: phosphate in detritus fractions\_5**

$$\frac{d}{dt} t\_detp\_5 =$$

+ (p\_lpp\_mort\_det\_5)\*                      mortality of large-cell phytoplankton  
((1.0/rfr\_pc\_enrichment\_det))

+ (p\_spp\_mort\_det\_5)\*                      mortality of small-scale phytoplankton  
((1.0/rfr\_pc\_enrichment\_det))

continued on next page...



## Tracer equations, continued from previous page

$$\begin{aligned}
& + (p\_cya\_mort\_det\_5) * \quad \text{mortality of diazotroph cyanobacteria} \\
& ((1.0/rfr\_pc\_enrichment\_det)) \\
& + (p\_zoo\_mort\_det\_5) * \quad \text{mortality of zooplankton} \\
& ((1.0/rfr\_pc\_enrichment\_det)) \\
& + \quad \text{sedimentary detritus erosion} \\
& p\_sedp\_5\_ero\_detp / (cgt\_cellhei \\
& cgt\_density) \\
& + \quad \text{bio resuspension of sedimentary detritus} \\
& p\_sedp\_5\_biores\_detp / (cgt\_cell \\
& cgt\_density) \\
& + \quad \text{surface flux of detritus} \\
& p\_stf\_det\_5 / (cgt\_cellheight * \\
& cgt\_density) \\
& - \quad \text{detritus sedimentation} \\
& p\_detp\_5\_sedi\_sedp / (cgt\_cellhe \\
& cgt\_density) \\
& - p\_detp\_5\_remin\_po4 \quad \text{recycling of detritus to ammonium using} \\
& \quad \text{oxygen (respiration)}
\end{aligned}$$

## Change of: phosphate in detritus fractions\_6

$$\frac{d}{dt} t\_detp\_6 =$$

$$\begin{aligned}
& + (p\_lpp\_mort\_det\_6) * \quad \text{mortality of large-cell phytoplankton} \\
& ((1.0/rfr\_pc\_enrichment\_det)) \\
& + (p\_spp\_mort\_det\_6) * \quad \text{mortality of small-scale phytoplankton} \\
& ((1.0/rfr\_pc\_enrichment\_det)) \\
& + (p\_cya\_mort\_det\_6) * \quad \text{mortality of diazotroph cyanobacteria} \\
& ((1.0/rfr\_pc\_enrichment\_det)) \\
& + (p\_zoo\_mort\_det\_6) * \quad \text{mortality of zooplankton} \\
& ((1.0/rfr\_pc\_enrichment\_det)) \\
& + \quad \text{sedimentary detritus erosion} \\
& p\_sedp\_6\_ero\_detp / (cgt\_cellhei \\
& cgt\_density)
\end{aligned}$$

continued on next page...

## Tracer equations, continued from previous page

$$\begin{aligned}
& + \text{p\_sedp\_6\_biores\_detp} / (\text{cgt\_cell} \\
& \text{cgt\_density}) \quad \text{bio resuspension of sedimentary detritus} \\
& + \text{p\_stf\_det\_6} / (\text{cgt\_cellheight} * \\
& \text{cgt\_density}) \quad \text{surface flux of detritus} \\
& - \text{p\_detp\_6\_sedi\_sedp} / (\text{cgt\_cellhe} \\
& \text{cgt\_density}) \quad \text{detritus sedimentation} \\
& - \text{p\_detp\_6\_remin\_po4} \quad \text{recycling of detritus to ammonium using} \\
& \quad \text{oxygen (respiration)}
\end{aligned}$$

## Change of: phosphate in sedimentary detritus fractions\_\_1

$$\begin{aligned}
\frac{d}{dt} \text{t\_sedp\_1} = & \\
& + \text{p\_detp\_1\_sedi\_sedp} \quad \text{detritus sedimentation} \\
& - \text{p\_sedp\_1\_ero\_detp} \quad \text{sedimentary detritus erosion} \\
& - \text{p\_sedp\_1\_biores\_detp} \quad \text{bio resuspension of sedimentary detritus} \\
& - \text{p\_sedp\_1\_removal} \quad \text{transport from fluffy layer to deep basins} \\
& - \text{p\_sedp\_1\_remin\_po4} \quad \text{recycling of sediment detrital phosphate} \\
& - \text{p\_sedp\_1\_sulfdeep\_po4} \quad \text{parameterization for recycling of sedimentary} \\
& \quad \text{detritus to ammonium below the deepest} \\
& \quad \text{sediment layer (sulfate reduction / methane} \\
& \quad \text{formation)}
\end{aligned}$$

## Change of: phosphate in sedimentary detritus fractions\_\_2

$$\begin{aligned}
\frac{d}{dt} \text{t\_sedp\_2} = & \\
& + \text{p\_detp\_2\_sedi\_sedp} \quad \text{detritus sedimentation} \\
& - \text{p\_sedp\_2\_ero\_detp} \quad \text{sedimentary detritus erosion} \\
& - \text{p\_sedp\_2\_biores\_detp} \quad \text{bio resuspension of sedimentary detritus} \\
& - \text{p\_sedp\_2\_removal} \quad \text{transport from fluffy layer to deep basins}
\end{aligned}$$

continued on next page...

## Tracer equations, continued from previous page

- p\_sedp\_2\_remin\_po4      recycling of sediment detrital phosphate
- p\_sedp\_2\_sulfdeep\_po4      parameterization for recycling of sedimentary detritus to ammonium below the deepest sediment layer (sulfate reduction / methane formation)

**Change of: phosphate in sedimentary detritus fractions\_3**

$$\frac{d}{dt} t\_sedp\_3 =$$

- + p\_detp\_3\_sedi\_sedp      detritus sedimentation
- p\_sedp\_3\_ero\_detp      sedimentary detritus erosion
- p\_sedp\_3\_biores\_detp      bio resuspension of sedimentary detritus
- p\_sedp\_3\_removal      transport from fluffy layer to deep basins
- p\_sedp\_3\_remin\_po4      recycling of sediment detrital phosphate
- p\_sedp\_3\_sulfdeep\_po4      parameterization for recycling of sedimentary detritus to ammonium below the deepest sediment layer (sulfate reduction / methane formation)

**Change of: phosphate in sedimentary detritus fractions\_4**

$$\frac{d}{dt} t\_sedp\_4 =$$

- + p\_detp\_4\_sedi\_sedp      detritus sedimentation
- p\_sedp\_4\_ero\_detp      sedimentary detritus erosion
- p\_sedp\_4\_biores\_detp      bio resuspension of sedimentary detritus
- p\_sedp\_4\_removal      transport from fluffy layer to deep basins
- p\_sedp\_4\_remin\_po4      recycling of sediment detrital phosphate
- p\_sedp\_4\_sulfdeep\_po4      parameterization for recycling of sedimentary detritus to ammonium below the deepest sediment layer (sulfate reduction / methane formation)

continued on next page...

## Tracer equations, continued from previous page

**Change of: phosphate in sedimentary detritus fractions\_5**

$$\frac{d}{dt} t\_sedp\_5 =$$

|                         |                                                                                                                                             |
|-------------------------|---------------------------------------------------------------------------------------------------------------------------------------------|
| + p_detp_5_sedi_sedp    | detritus sedimentation                                                                                                                      |
| - p_sedp_5_ero_detp     | sedimentary detritus erosion                                                                                                                |
| - p_sedp_5_biores_detp  | bio resuspension of sedimentary detritus                                                                                                    |
| - p_sedp_5_removal      | transport from fluffy layer to deep basins                                                                                                  |
| - p_sedp_5_remin_po4    | recycling of sediment detrital phosphate                                                                                                    |
| - p_sedp_5_sulfdeep_po4 | parameterization for recycling of sedimentary detritus to ammonium below the deepest sediment layer (sulfate reduction / methane formation) |

**Change of: phosphate in sedimentary detritus fractions\_6**

$$\frac{d}{dt} t\_sedp\_6 =$$

|                         |                                                                                                                                             |
|-------------------------|---------------------------------------------------------------------------------------------------------------------------------------------|
| + p_detp_6_sedi_sedp    | detritus sedimentation                                                                                                                      |
| - p_sedp_6_ero_detp     | sedimentary detritus erosion                                                                                                                |
| - p_sedp_6_biores_detp  | bio resuspension of sedimentary detritus                                                                                                    |
| - p_sedp_6_removal      | transport from fluffy layer to deep basins                                                                                                  |
| - p_sedp_6_remin_po4    | recycling of sediment detrital phosphate                                                                                                    |
| - p_sedp_6_sulfdeep_po4 | parameterization for recycling of sedimentary detritus to ammonium below the deepest sediment layer (sulfate reduction / methane formation) |

**Change of: particulate organic carbon**

$$\frac{d}{dt} t\_poc =$$

|                   |                          |
|-------------------|--------------------------|
| + p_assim_lpp_poc | Production of POC by LPP |
| + p_assim_spp_poc | Production of POC by SPP |

continued on next page...

| Tracer equations, continued from previous page |                                                               |
|------------------------------------------------|---------------------------------------------------------------|
| + p_assim_cya_poc                              | Production of POC by CYA                                      |
| - p_poc_resp                                   | respiration of POC                                            |
| - p_poc_denit                                  | recycling of POC using nitrate (denitrification)              |
| - p_poc_sulf                                   | Mineralization of POC, e-acceptor sulfate (sulfate reduction) |
